# Supplementary material for: Spatial Transcriptomic Analysis of Focal and Normal Areas of Myocyte Disarray in Human Hypertrophic Cardiomyopathy
Source: Int J Mol Sci. 2023 Aug 10;24(16):12625. doi: 10.3390/ijms241612625 (PMC10454036; doi:10.3390/ijms241612625)
Supplement: Supplementary file 1 [file ijms-24-12625-s001.zip]

Archive with 4 entries (4 files):
- ijms-2513977-supplementary figures.pdf
- supplemental_table_S1_phenotype_disarray_differential_expression_results.xlsx
- supplemental_table_S2_significant_ligand_receptor_pairs_results.xlsx
- supplemental_table_S3_overlapping_cell_marker_genes.xlsx
