# Supplementary material for: Spatial Transcriptomic Analysis of Focal and Normal Areas of Myocyte Disarray in Human Hypertrophic Cardiomyopathy
Source: Int J Mol Sci. 2023 Aug 10;24(16):12625. doi: 10.3390/ijms241612625 (PMC10454036; doi:10.3390/ijms241612625)
Supplement: Supplementary file 1 [file ijms-24-12625-s001.zip › supplemental_table_S1_phenotype_disarray_differential_expression_results.xlsx]

## Sheet: Sheet 1
Gene	Contrast	Estimate	P-Value	FDR Adjusted P-Value	Change Direction
H3-3A	CONTROL_Mild - HCM_Severe	0.796229	0.000352212	0.00308585	Upregulated
H3-3A	CONTROL_Normal - HCM_Severe	0.801954	0.00147508	0.00909511	Upregulated
H3-3A	CONTROL_Mild - HCM_Moderate	0.847316	0.000246465	0.0023307	Upregulated
H3-3A	CONTROL_Normal - HCM_Moderate	0.853041	0.00141767	0.00888208	Upregulated
H3-3A	CONTROL_Mild - HCM_Mild	0.981974	7.66908e-05	0.000900418	Upregulated
H3-3A	CONTROL_Normal - HCM_Mild	0.987699	0.00049016	0.00401544	Upregulated
H3-3A	CONTROL_Mild - HCM_Normal	1.00774	8.99365e-05	0.00103387	Upregulated
H3-3A	CONTROL_Normal - HCM_Normal	1.01346	0.000721339	0.00541004	Upregulated
H2AX	HCM_Mild - HCM_Severe	-0.14879	0.00369475	0.0179077	Downregulated
H2AX	HCM_Normal - HCM_Severe	-0.163331	0.000348313	0.00306093	Downregulated
H2AX	CONTROL_Mild - HCM_Severe	-0.465702	6.90727e-09	3.23082e-07	Downregulated
H2AX	CONTROL_Normal - HCM_Severe	-0.390233	8.15913e-12	1.24534e-09	Downregulated
H2AX	HCM_Mild - HCM_Moderate	-0.150594	0.00157614	0.00954814	Downregulated
H2AX	HCM_Normal - HCM_Moderate	-0.165135	7.13504e-05	0.000853849	Downregulated
H2AX	CONTROL_Mild - HCM_Moderate	-0.467506	2.1709e-09	1.19537e-07	Downregulated
H2AX	CONTROL_Normal - HCM_Moderate	-0.392037	2.84818e-13	7.07975e-11	Downregulated
H2AX	CONTROL_Mild - HCM_Mild	-0.316912	3.26483e-05	0.000455924	Downregulated
H2AX	CONTROL_Normal - HCM_Mild	-0.241443	5.69455e-06	0.00010586	Downregulated
H2AX	CONTROL_Mild - HCM_Normal	-0.302371	2.57098e-05	0.000379111	Downregulated
H2AX	CONTROL_Normal - HCM_Normal	-0.226902	1.24641e-06	2.81655e-05	Downregulated
H3C8	CONTROL_Mild - HCM_Severe	-0.673506	0.000209909	0.00205654	Downregulated
H3C8	CONTROL_Normal - HCM_Severe	-0.577047	3.95383e-06	7.7264e-05	Downregulated
H3C8	HCM_Mild - HCM_Moderate	-0.319402	0.00646134	0.0275557	Downregulated
H3C8	CONTROL_Mild - HCM_Moderate	-0.69887	7.32154e-05	0.000867811	Downregulated
H3C8	CONTROL_Normal - HCM_Moderate	-0.602412	2.42379e-07	7.07615e-06	Downregulated
H3C8	CONTROL_Mild - HCM_Normal	-0.468775	0.00598286	0.0260515	Downregulated
H3C8	CONTROL_Normal - HCM_Normal	-0.372317	0.00071318	0.00536272	Downregulated
A2M	CONTROL_Mild - HCM_Severe	0.964134	0.00391756	0.0187474	Upregulated
A2M	CONTROL_Normal - HCM_Severe	1.02783	0.00545575	0.0241798	Upregulated
A2M	CONTROL_Mild - HCM_Moderate	1.0026	0.00330279	0.0164218	Upregulated
A2M	CONTROL_Normal - HCM_Moderate	1.0663	0.00532582	0.0237248	Upregulated
A2M	CONTROL_Mild - HCM_Mild	1.15654	0.00146163	0.00903779	Upregulated
A2M	CONTROL_Normal - HCM_Mild	1.22024	0.00251524	0.0134994	Upregulated
A2M	CONTROL_Mild - HCM_Normal	1.06006	0.00260585	0.013866	Upregulated
A2M	CONTROL_Normal - HCM_Normal	1.12376	0.00435661	0.0202877	Upregulated
ABCF1	HCM_Mild - HCM_Severe	-0.307856	2.00483e-07	5.97331e-06	Downregulated
ABCF1	HCM_Normal - HCM_Severe	-0.247331	1.1444e-06	2.61321e-05	Downregulated
ABCF1	CONTROL_Mild - HCM_Severe	-0.381956	2.02413e-06	4.30561e-05	Downregulated
ABCF1	CONTROL_Normal - HCM_Severe	-0.38093	9.38985e-11	9.59143e-09	Downregulated
ABCF1	HCM_Mild - HCM_Moderate	-0.329624	5.67265e-09	2.72663e-07	Downregulated
ABCF1	HCM_Normal - HCM_Moderate	-0.269099	1.53004e-08	6.52518e-07	Downregulated
ABCF1	CONTROL_Mild - HCM_Moderate	-0.403725	2.88001e-07	8.05661e-06	Downregulated
ABCF1	CONTROL_Normal - HCM_Moderate	-0.402698	7.40256e-13	1.61006e-10	Downregulated
ABCF1	CONTROL_Normal - HCM_Normal	-0.1336	0.003668	0.0178177	Downregulated
AKT2	HCM_Normal - HCM_Moderate	-0.241066	0.0125137	0.0458202	Downregulated
ALDOC	CONTROL_Mild - HCM_Severe	0.552528	0.00343418	0.0168894	Upregulated
ALDOC	CONTROL_Normal - HCM_Severe	0.454435	0.0116554	0.0435899	Upregulated
ALDOC	CONTROL_Mild - HCM_Moderate	0.451239	0.0095855	0.0373628	Upregulated
API5	CONTROL_Mild - HCM_Moderate	-0.30584	0.0120131	0.044455	Downregulated
APP	CONTROL_Mild - HCM_Severe	1.01954	3.02658e-07	8.41255e-06	Upregulated
APP	CONTROL_Normal - HCM_Severe	1.01997	4.24464e-05	0.000563791	Upregulated
APP	CONTROL_Mild - HCM_Moderate	1.03948	2.3684e-07	6.96116e-06	Upregulated
APP	CONTROL_Normal - HCM_Moderate	1.03991	6.58533e-05	0.000802415	Upregulated
APP	CONTROL_Mild - HCM_Mild	1.21684	2.82987e-08	1.1242e-06	Upregulated
APP	CONTROL_Normal - HCM_Mild	1.21727	9.13591e-06	0.000160896	Upregulated
APP	CONTROL_Mild - HCM_Normal	1.2133	6.29438e-08	2.29126e-06	Upregulated
APP	CONTROL_Normal - HCM_Normal	1.21373	3.4056e-05	0.000470369	Upregulated
ATG7	HCM_Mild - HCM_Severe	-0.283453	0.000248591	0.00234826	Downregulated
ATG7	HCM_Normal - HCM_Severe	-0.20538	0.00195525	0.0111692	Downregulated
ATG7	CONTROL_Mild - HCM_Severe	-0.581909	3.41768e-07	9.29181e-06	Downregulated
ATG7	CONTROL_Normal - HCM_Severe	-0.496113	7.01659e-10	4.62457e-08	Downregulated
ATG7	HCM_Mild - HCM_Moderate	-0.264632	0.000214679	0.00209619	Downregulated
ATG7	HCM_Normal - HCM_Moderate	-0.186558	0.00174112	0.0102558	Downregulated
ATG7	CONTROL_Mild - HCM_Moderate	-0.563087	2.93075e-07	8.17227e-06	Downregulated
ATG7	CONTROL_Normal - HCM_Moderate	-0.477291	1.34457e-10	1.26742e-08	Downregulated
ATG7	CONTROL_Mild - HCM_Mild	-0.298456	0.00548965	0.0242806	Downregulated
ATG7	CONTROL_Normal - HCM_Mild	-0.212659	0.00403741	0.0191838	Downregulated
ATG7	CONTROL_Mild - HCM_Normal	-0.376529	0.000280732	0.0025955	Downregulated
ATG7	CONTROL_Normal - HCM_Normal	-0.290733	1.59624e-05	0.00025256	Downregulated
ATRX	HCM_Moderate - HCM_Severe	-0.134631	0.00172656	0.0102045	Downregulated
AXL	CONTROL_Mild - HCM_Severe	-0.437657	5.24861e-05	0.00066564	Downregulated
AXL	CONTROL_Normal - HCM_Severe	-0.526258	1.06308e-10	1.051e-08	Downregulated
AXL	CONTROL_Mild - HCM_Moderate	-0.372779	0.000273479	0.00254195	Downregulated
AXL	CONTROL_Normal - HCM_Moderate	-0.46138	3.02509e-10	2.39257e-08	Downregulated
AXL	CONTROL_Mild - HCM_Mild	-0.336595	0.0018016	0.0104842	Downregulated
AXL	CONTROL_Normal - HCM_Mild	-0.425196	1.39733e-07	4.42065e-06	Downregulated
AXL	CONTROL_Mild - HCM_Normal	-0.281382	0.00508969	0.022967	Downregulated
AXL	CONTROL_Normal - HCM_Normal	-0.369983	1.29147e-07	4.16142e-06	Downregulated
BBS1	CONTROL_Mild - HCM_Severe	-0.436413	0.000321337	0.00288209	Downregulated
BBS1	CONTROL_Normal - HCM_Severe	-0.475885	0.000668779	0.00510384	Downregulated
BBS1	CONTROL_Mild - HCM_Moderate	-0.483907	6.48072e-05	0.000794117	Downregulated
BBS1	CONTROL_Normal - HCM_Moderate	-0.523379	0.000659037	0.00506057	Downregulated
BBS1	CONTROL_Mild - HCM_Mild	-0.409093	0.000758474	0.00560451	Downregulated
BBS1	CONTROL_Normal - HCM_Mild	-0.448565	0.000660503	0.00506735	Downregulated
BBS1	CONTROL_Mild - HCM_Normal	-0.419256	0.000398589	0.00341409	Downregulated
BBS1	CONTROL_Normal - HCM_Normal	-0.458728	0.00140589	0.00882486	Downregulated
BCL6	CONTROL_Normal - HCM_Severe	-0.300726	0.0130668	0.0474678	Downregulated
BCL6	CONTROL_Mild - HCM_Moderate	-0.323561	0.00600716	0.0261183	Downregulated
BCL6	CONTROL_Normal - HCM_Moderate	-0.338605	0.00814742	0.032938	Downregulated
BMP4	HCM_Mild - HCM_Severe	-0.271554	0.000114835	0.00126464	Downregulated
BMP4	HCM_Normal - HCM_Severe	-0.32983	3.63267e-07	9.72437e-06	Downregulated
BMP4	CONTROL_Mild - HCM_Severe	-0.540453	1.88555e-07	5.69594e-06	Downregulated
BMP4	CONTROL_Normal - HCM_Severe	-0.514912	1.11273e-11	1.6691e-09	Downregulated
BMP4	HCM_Mild - HCM_Moderate	-0.258525	7.41339e-05	0.000876311	Downregulated
BMP4	HCM_Normal - HCM_Moderate	-0.316801	8.04671e-08	2.80025e-06	Downregulated
BMP4	CONTROL_Mild - HCM_Moderate	-0.527424	1.33034e-07	4.25513e-06	Downregulated
BMP4	CONTROL_Normal - HCM_Moderate	-0.501882	1.11487e-12	2.15541e-10	Downregulated
BMP4	CONTROL_Mild - HCM_Mild	-0.268899	0.00562525	0.0247703	Downregulated
BMP4	CONTROL_Normal - HCM_Mild	-0.243358	0.000363728	0.00316744	Downregulated
BMP4	CONTROL_Normal - HCM_Normal	-0.185081	0.00154088	0.00938774	Downregulated
BNIP3L	HCM_Mild - HCM_Severe	-0.289966	0.00117122	0.00771937	Downregulated
BNIP3L	HCM_Normal - HCM_Severe	-0.312287	0.000988081	0.00680484	Downregulated
BNIP3L	CONTROL_Mild - HCM_Severe	-0.361528	0.000339009	0.00299733	Downregulated
BNIP3L	CONTROL_Normal - HCM_Severe	-0.357882	0.00186382	0.0107656	Downregulated
BNIP3L	HCM_Mild - HCM_Moderate	-0.223141	0.00417313	0.0196491	Downregulated
BNIP3L	HCM_Normal - HCM_Moderate	-0.245462	0.0028944	0.0150426	Downregulated
BNIP3L	CONTROL_Mild - HCM_Moderate	-0.294704	0.00162721	0.00974981	Downregulated
BNIP3L	CONTROL_Normal - HCM_Moderate	-0.291057	0.00570835	0.0251075	Downregulated
C1QBP	CONTROL_Normal - HCM_Severe	0.242442	0.00343403	0.0168894	Upregulated
C1QBP	CONTROL_Normal - HCM_Moderate	0.212418	0.00768922	0.0314214	Upregulated
C1QBP	CONTROL_Mild - HCM_Mild	0.228106	0.00753004	0.0309728	Upregulated
C1QBP	CONTROL_Normal - HCM_Mild	0.313603	0.000606975	0.00476596	Upregulated
C1QBP	CONTROL_Mild - HCM_Normal	0.239324	0.0034981	0.0171354	Upregulated
C1QBP	CONTROL_Normal - HCM_Normal	0.324821	0.00158541	0.00957185	Upregulated
C1S	HCM_Normal - HCM_Severe	-0.402973	0.00917644	0.0361168	Downregulated
C1S	CONTROL_Mild - HCM_Severe	-0.545205	0.00348438	0.0171087	Downregulated
C1S	CONTROL_Normal - HCM_Severe	-0.480678	0.0109584	0.0413828	Downregulated
C3	HCM_Mild - HCM_Severe	-0.509546	0.00548938	0.0242806	Downregulated
C3	HCM_Normal - HCM_Severe	-0.5796	0.00271226	0.0142923	Downregulated
C3	HCM_Normal - HCM_Moderate	-0.433989	0.00876733	0.0348609	Downregulated
C7	HCM_Normal - HCM_Severe	-0.583602	0.0139009	0.0497483	Downregulated
CACNA2D1	HCM_Mild - HCM_Severe	-0.333862	0.00982331	0.0380342	Downregulated
CACNA2D1	HCM_Normal - HCM_Severe	-0.320821	0.0133431	0.0482683	Downregulated
CACNA2D1	HCM_Mild - HCM_Moderate	-0.326304	0.00831735	0.033485	Downregulated
CACNA2D1	HCM_Normal - HCM_Moderate	-0.313263	0.0123524	0.0453635	Downregulated
CACNA2D1	CONTROL_Mild - HCM_Mild	0.508506	0.00155177	0.00943424	Upregulated
CACNA2D1	CONTROL_Normal - HCM_Mild	0.523528	0.00712255	0.0297343	Upregulated
CACNA2D1	CONTROL_Mild - HCM_Normal	0.495465	0.0019835	0.0113009	Upregulated
CACNA2D1	CONTROL_Normal - HCM_Normal	0.510487	0.0122544	0.0451177	Upregulated
CACNB2	HCM_Mild - HCM_Severe	-0.243421	0.00794726	0.0322637	Downregulated
CACNB2	HCM_Normal - HCM_Severe	-0.272845	0.0039151	0.0187459	Downregulated
CACNB2	CONTROL_Mild - HCM_Severe	-0.415069	0.000370922	0.00320778	Downregulated
CACNB2	CONTROL_Normal - HCM_Severe	-0.29094	0.00783634	0.0318729	Downregulated
CACNB2	HCM_Mild - HCM_Moderate	-0.223905	0.00870704	0.0347007	Downregulated
CACNB2	HCM_Normal - HCM_Moderate	-0.253329	0.00423727	0.0198622	Downregulated
CACNB2	CONTROL_Mild - HCM_Moderate	-0.395553	0.000437993	0.00366751	Downregulated
CACNB2	CONTROL_Normal - HCM_Moderate	-0.271424	0.0109128	0.0412607	Downregulated
CAPN2	HCM_Mild - HCM_Severe	-0.17856	0.00677771	0.0286104	Downregulated
CAPN2	HCM_Mild - HCM_Moderate	-0.145276	0.0139126	0.0497696	Downregulated
CAPN2	CONTROL_Mild - HCM_Mild	0.298952	0.000244626	0.00232088	Upregulated
CAPN2	CONTROL_Mild - HCM_Normal	0.248144	0.00108913	0.00729827	Upregulated
CCND2	CONTROL_Mild - HCM_Severe	1.08037	0.00221302	0.0122789	Upregulated
CCND2	CONTROL_Normal - HCM_Severe	1.14486	0.00338791	0.016728	Upregulated
CCND2	CONTROL_Mild - HCM_Moderate	1.06513	0.00254101	0.0135958	Upregulated
CCND2	CONTROL_Normal - HCM_Moderate	1.12961	0.00410529	0.0194426	Upregulated
CCND2	CONTROL_Mild - HCM_Mild	1.16795	0.00142004	0.00888801	Upregulated
CCND2	CONTROL_Normal - HCM_Mild	1.23244	0.00231197	0.0126903	Upregulated
CCND2	CONTROL_Mild - HCM_Normal	1.16128	0.00171268	0.0101363	Upregulated
CCND2	CONTROL_Normal - HCM_Normal	1.22577	0.00296209	0.0153212	Upregulated
CD163	HCM_Mild - HCM_Severe	-0.557765	7.34057e-05	0.000868884	Downregulated
CD163	HCM_Normal - HCM_Severe	-0.608995	0.000185943	0.00187235	Downregulated
CD163	CONTROL_Mild - HCM_Severe	-0.702597	1.77219e-06	3.82169e-05	Downregulated
CD163	CONTROL_Normal - HCM_Severe	-0.760845	0.000456053	0.00378594	Downregulated
CD163	HCM_Mild - HCM_Moderate	-0.451205	0.000263443	0.00246712	Downregulated
CD163	HCM_Normal - HCM_Moderate	-0.502435	0.000516362	0.00418282	Downregulated
CD163	CONTROL_Mild - HCM_Moderate	-0.596037	1.18609e-05	0.000197681	Downregulated
CD163	CONTROL_Normal - HCM_Moderate	-0.654284	0.00195425	0.0111692	Downregulated
CD164	HCM_Moderate - HCM_Severe	0.104011	0.0108121	0.0409804	Upregulated
CD36	CONTROL_Mild - HCM_Severe	1.79299	0.00702746	0.0293796	Upregulated
CD36	CONTROL_Mild - HCM_Moderate	1.68201	0.00935314	0.0366377	Upregulated
CD59	HCM_Mild - HCM_Moderate	0.302878	0.0109593	0.0413828	Upregulated
CD63	CONTROL_Mild - HCM_Severe	0.759065	0.00123605	0.00797156	Upregulated
CD63	CONTROL_Normal - HCM_Severe	0.788757	0.00335723	0.0166326	Upregulated
CD63	CONTROL_Mild - HCM_Moderate	0.764952	0.00123819	0.00797355	Upregulated
CD63	CONTROL_Normal - HCM_Moderate	0.794643	0.00389793	0.0186843	Upregulated
CD63	CONTROL_Mild - HCM_Mild	0.828521	0.00070221	0.00529376	Upregulated
CD63	CONTROL_Normal - HCM_Mild	0.858212	0.00211346	0.0118703	Upregulated
CD63	CONTROL_Mild - HCM_Normal	0.808487	0.000991626	0.00681988	Upregulated
CD63	CONTROL_Normal - HCM_Normal	0.838179	0.00324613	0.0161934	Upregulated
CD81	CONTROL_Mild - HCM_Severe	0.964039	0.00154065	0.00938774	Upregulated
CD81	CONTROL_Normal - HCM_Severe	0.950887	0.00224727	0.0124451	Upregulated
CD81	CONTROL_Mild - HCM_Moderate	0.994086	0.00146044	0.00903684	Upregulated
CD81	CONTROL_Normal - HCM_Moderate	0.980935	0.00219855	0.0122192	Upregulated
CD81	CONTROL_Mild - HCM_Mild	0.963749	0.00147384	0.00909389	Upregulated
CD81	CONTROL_Normal - HCM_Mild	0.950598	0.0021356	0.0119407	Upregulated
CD81	CONTROL_Mild - HCM_Normal	0.990084	0.0014284	0.00893391	Upregulated
CD81	CONTROL_Normal - HCM_Normal	0.976933	0.00212455	0.0119022	Upregulated
CD9	HCM_Mild - HCM_Severe	-0.273874	0.0124181	0.0455662	Downregulated
CD9	HCM_Normal - HCM_Severe	-0.313441	0.00720806	0.0299905	Downregulated
CDH2	CONTROL_Mild - HCM_Severe	1.22682	0.000529508	0.00425759	Upregulated
CDH2	CONTROL_Normal - HCM_Severe	1.28377	0.000759664	0.00560451	Upregulated
CDH2	CONTROL_Mild - HCM_Moderate	1.22938	0.000588289	0.00462759	Upregulated
CDH2	CONTROL_Normal - HCM_Moderate	1.28633	0.000890168	0.0062759	Upregulated
CDH2	CONTROL_Mild - HCM_Mild	1.08438	0.000981963	0.006791	Upregulated
CDH2	CONTROL_Normal - HCM_Mild	1.14133	0.00121647	0.00789438	Upregulated
CDH2	CONTROL_Mild - HCM_Normal	1.13052	0.000889558	0.0062759	Upregulated
CDH2	CONTROL_Normal - HCM_Normal	1.18747	0.00120271	0.00783791	Upregulated
CDK4	HCM_Mild - HCM_Severe	-0.293104	0.00262346	0.0139341	Downregulated
CDK4	HCM_Normal - HCM_Severe	-0.300969	0.00245888	0.0132624	Downregulated
CDK4	CONTROL_Mild - HCM_Severe	-0.336108	0.00274164	0.0143949	Downregulated
CDK4	CONTROL_Normal - HCM_Severe	-0.422088	0.00252461	0.0135406	Downregulated
CDK4	HCM_Mild - HCM_Moderate	-0.292069	0.00181607	0.0105403	Downregulated
CDK4	HCM_Normal - HCM_Moderate	-0.299933	0.00189714	0.0109088	Downregulated
CDK4	CONTROL_Mild - HCM_Moderate	-0.335072	0.00239651	0.0130147	Downregulated
CDK4	CONTROL_Normal - HCM_Moderate	-0.421052	0.00306684	0.0156674	Downregulated
CHUK	HCM_Mild - HCM_Severe	-0.263425	0.00656769	0.0279544	Downregulated
CHUK	HCM_Normal - HCM_Severe	-0.292203	0.00366163	0.0178123	Downregulated
CHUK	CONTROL_Mild - HCM_Severe	-0.471758	0.000142042	0.00150703	Downregulated
CHUK	CONTROL_Normal - HCM_Severe	-0.447281	0.00131127	0.00833313	Downregulated
CHUK	HCM_Mild - HCM_Moderate	-0.265819	0.00422391	0.0198316	Downregulated
CHUK	HCM_Normal - HCM_Moderate	-0.294597	0.00264514	0.0140141	Downregulated
CHUK	CONTROL_Mild - HCM_Moderate	-0.474152	9.3008e-05	0.00105951	Downregulated
CHUK	CONTROL_Normal - HCM_Moderate	-0.449675	0.00179045	0.0104473	Downregulated
CLEC14A	CONTROL_Mild - HCM_Severe	-0.309044	0.00301584	0.0155008	Downregulated
CLEC14A	CONTROL_Normal - HCM_Severe	-0.325696	0.00504683	0.0228447	Downregulated
CLEC14A	CONTROL_Mild - HCM_Moderate	-0.325853	0.00166078	0.00990998	Downregulated
CLEC14A	CONTROL_Normal - HCM_Moderate	-0.342506	0.00469145	0.0215272	Downregulated
CMTM6	HCM_Mild - HCM_Severe	-0.229476	0.0120068	0.044455	Downregulated
CMTM6	HCM_Normal - HCM_Severe	-0.235522	0.0100335	0.0385905	Downregulated
CMTM6	CONTROL_Mild - HCM_Severe	-0.506035	4.1732e-05	0.000556001	Downregulated
CMTM6	CONTROL_Normal - HCM_Severe	-0.464027	0.00118746	0.00777341	Downregulated
CMTM6	HCM_Mild - HCM_Moderate	-0.238673	0.00681734	0.0287638	Downregulated
CMTM6	HCM_Normal - HCM_Moderate	-0.244719	0.00641631	0.0274579	Downregulated
CMTM6	CONTROL_Mild - HCM_Moderate	-0.515232	2.19429e-05	0.000332584	Downregulated
CMTM6	CONTROL_Normal - HCM_Moderate	-0.473224	0.0017439	0.0102652	Downregulated
CMTM6	CONTROL_Mild - HCM_Mild	-0.276559	0.0124382	0.0456013	Downregulated
CMTM6	CONTROL_Mild - HCM_Normal	-0.270513	0.010817	0.0409804	Downregulated
CNOT2	CONTROL_Mild - HCM_Severe	-0.407308	0.00252602	0.0135406	Downregulated
CNOT2	CONTROL_Normal - HCM_Severe	-0.392781	0.00972734	0.0377803	Downregulated
CNOT2	CONTROL_Mild - HCM_Moderate	-0.371969	0.0038837	0.0186536	Downregulated
COL1A1	HCM_Mild - HCM_Severe	-0.534734	0.000878456	0.00622359	Downregulated
COL1A1	HCM_Normal - HCM_Severe	-0.580385	0.000667746	0.00510384	Downregulated
COL1A1	CONTROL_Mild - HCM_Severe	-0.41135	0.0113118	0.0424927	Downregulated
COL1A1	HCM_Mild - HCM_Moderate	-0.335898	0.0102395	0.0392612	Downregulated
COL1A1	HCM_Normal - HCM_Moderate	-0.38155	0.00521721	0.0233847	Downregulated
COL1A2	HCM_Normal - HCM_Severe	-0.655709	0.0115795	0.0433482	Downregulated
COL1A2	CONTROL_Mild - HCM_Normal	0.867007	0.00872835	0.0347536	Upregulated
COL27A1	HCM_Normal - HCM_Severe	-0.164777	0.0136825	0.049108	Downregulated
COL27A1	CONTROL_Mild - HCM_Severe	-0.371781	0.000652401	0.00501475	Downregulated
COL27A1	CONTROL_Normal - HCM_Severe	-0.375184	1.03252e-06	2.4083e-05	Downregulated
COL27A1	HCM_Normal - HCM_Moderate	-0.149148	0.0129445	0.0471398	Downregulated
COL27A1	CONTROL_Mild - HCM_Moderate	-0.356151	0.000674199	0.00513619	Downregulated
COL27A1	CONTROL_Normal - HCM_Moderate	-0.359554	3.40846e-07	9.29181e-06	Downregulated
COL27A1	CONTROL_Normal - HCM_Mild	-0.263135	0.000632921	0.00491848	Downregulated
COL27A1	CONTROL_Normal - HCM_Normal	-0.210407	0.00149838	0.00917376	Downregulated
COL3A1	HCM_Normal - HCM_Severe	-0.533392	0.00867873	0.0346194	Downregulated
COL5A1	HCM_Mild - HCM_Severe	-0.35715	0.000347697	0.00305861	Downregulated
COL5A1	HCM_Normal - HCM_Severe	-0.380746	0.000294228	0.00269735	Downregulated
COL5A1	CONTROL_Mild - HCM_Severe	-0.375385	0.000874084	0.00620344	Downregulated
COL5A1	CONTROL_Normal - HCM_Severe	-0.392666	0.00102831	0.00699533	Downregulated
COL5A1	HCM_Mild - HCM_Moderate	-0.252736	0.00305723	0.015655	Downregulated
COL5A1	HCM_Normal - HCM_Moderate	-0.276332	0.00170925	0.0101235	Downregulated
COL5A1	CONTROL_Mild - HCM_Moderate	-0.270971	0.00943118	0.036877	Downregulated
COL5A1	CONTROL_Normal - HCM_Moderate	-0.288252	0.00596929	0.0260054	Downregulated
CPSF7	CONTROL_Mild - HCM_Severe	-0.309664	0.0011754	0.00772356	Downregulated
CPSF7	CONTROL_Normal - HCM_Severe	-0.370909	8.30321e-08	2.85525e-06	Downregulated
CPSF7	CONTROL_Mild - HCM_Moderate	-0.320074	0.00052765	0.00425085	Downregulated
CPSF7	CONTROL_Normal - HCM_Moderate	-0.381318	3.91188e-09	2.00196e-07	Downregulated
CPSF7	CONTROL_Normal - HCM_Mild	-0.276568	6.33592e-05	0.000779668	Downregulated
CPSF7	CONTROL_Normal - HCM_Normal	-0.262605	1.53535e-05	0.000247362	Downregulated
CREB1	HCM_Mild - HCM_Severe	-0.222808	0.000115621	0.00127168	Downregulated
CREB1	HCM_Normal - HCM_Severe	-0.224236	1.31498e-05	0.000215855	Downregulated
CREB1	CONTROL_Mild - HCM_Severe	-0.308022	0.000121897	0.00133397	Downregulated
CREB1	CONTROL_Normal - HCM_Severe	-0.411116	2.66249e-11	3.50965e-09	Downregulated
CREB1	HCM_Mild - HCM_Moderate	-0.143315	0.00544964	0.0241651	Downregulated
CREB1	HCM_Normal - HCM_Moderate	-0.144743	0.00110739	0.0073697	Downregulated
CREB1	CONTROL_Mild - HCM_Moderate	-0.22853	0.00232366	0.0127304	Downregulated
CREB1	CONTROL_Normal - HCM_Moderate	-0.331624	8.84601e-10	5.61754e-08	Downregulated
CREB1	CONTROL_Normal - HCM_Mild	-0.188308	0.000722272	0.00541237	Downregulated
CREB1	CONTROL_Normal - HCM_Normal	-0.18688	0.000137413	0.00147423	Downregulated
CUL1	HCM_Mild - HCM_Severe	-0.252428	0.00530258	0.0236577	Downregulated
CUL1	HCM_Normal - HCM_Severe	-0.311956	0.00307218	0.0156807	Downregulated
CUL1	HCM_Mild - HCM_Moderate	-0.293692	0.00182746	0.0105982	Downregulated
CUL1	HCM_Normal - HCM_Moderate	-0.35322	0.00178273	0.0104162	Downregulated
CUL1	CONTROL_Mild - HCM_Moderate	-0.250725	0.00642351	0.0274752	Downregulated
DDIT3	CONTROL_Mild - HCM_Severe	-0.353512	0.00703927	0.0294148	Downregulated
DDIT3	CONTROL_Normal - HCM_Severe	-0.350004	0.00952977	0.0371789	Downregulated
DDIT3	CONTROL_Mild - HCM_Moderate	-0.338294	0.00782321	0.0318493	Downregulated
DDIT3	CONTROL_Normal - HCM_Moderate	-0.334786	0.0114786	0.0430261	Downregulated
DSP	CONTROL_Mild - HCM_Severe	0.916944	0.00456959	0.0210904	Upregulated
DSP	CONTROL_Normal - HCM_Severe	0.80643	0.0107011	0.0406994	Upregulated
DSP	CONTROL_Mild - HCM_Moderate	0.848627	0.00664649	0.0282208	Upregulated
DSP	CONTROL_Mild - HCM_Normal	0.696727	0.0134253	0.0484646	Upregulated
DST	CONTROL_Mild - HCM_Severe	1.07006	0.000245781	0.00232676	Upregulated
DST	CONTROL_Normal - HCM_Severe	1.05964	0.000785308	0.00574615	Upregulated
DST	CONTROL_Mild - HCM_Moderate	1.02867	0.000349493	0.0030682	Upregulated
DST	CONTROL_Normal - HCM_Moderate	1.01825	0.00114259	0.00757662	Upregulated
DST	CONTROL_Mild - HCM_Mild	0.931385	0.000491172	0.00401994	Upregulated
DST	CONTROL_Normal - HCM_Mild	0.92096	0.00126632	0.00812461	Upregulated
DST	CONTROL_Mild - HCM_Normal	1.00261	0.000402549	0.00344364	Upregulated
DST	CONTROL_Normal - HCM_Normal	0.992189	0.00121682	0.00789438	Upregulated
EFNA5	CONTROL_Mild - HCM_Severe	-0.405765	0.00103385	0.00702696	Downregulated
EFNA5	CONTROL_Normal - HCM_Severe	-0.336386	0.00717607	0.029895	Downregulated
EFNA5	CONTROL_Mild - HCM_Moderate	-0.429682	0.000454705	0.00377835	Downregulated
EFNA5	CONTROL_Normal - HCM_Moderate	-0.360304	0.00627363	0.0269934	Downregulated
EGF	CONTROL_Mild - HCM_Severe	-0.455802	0.00721591	0.0300088	Downregulated
EGF	CONTROL_Mild - HCM_Moderate	-0.41409	0.0107331	0.0407588	Downregulated
EIF2AK2	CONTROL_Mild - HCM_Severe	-0.257488	0.00384703	0.0185219	Downregulated
EIF2AK2	CONTROL_Normal - HCM_Severe	-0.275544	9.95136e-06	0.000173849	Downregulated
EIF2AK2	HCM_Mild - HCM_Moderate	-0.197134	0.0010054	0.00689824	Downregulated
EIF2AK2	HCM_Normal - HCM_Moderate	-0.191368	0.000207851	0.00204098	Downregulated
EIF2AK2	CONTROL_Mild - HCM_Moderate	-0.318476	0.000276534	0.00256486	Downregulated
EIF2AK2	CONTROL_Normal - HCM_Moderate	-0.336532	2.11863e-08	8.57308e-07	Downregulated
EIF2AK2	CONTROL_Normal - HCM_Normal	-0.145164	0.00742355	0.0306671	Downregulated
ENG	CONTROL_Mild - HCM_Severe	0.547905	0.00917805	0.0361168	Upregulated
ENG	CONTROL_Normal - HCM_Severe	0.619907	0.00643296	0.0274753	Upregulated
ENG	CONTROL_Mild - HCM_Moderate	0.702254	0.00159547	0.00961925	Upregulated
ENG	CONTROL_Normal - HCM_Moderate	0.774256	0.00240898	0.0130499	Upregulated
ENG	CONTROL_Mild - HCM_Mild	0.674726	0.00255011	0.0136361	Upregulated
ENG	CONTROL_Normal - HCM_Mild	0.746727	0.00238474	0.012967	Upregulated
ENG	CONTROL_Mild - HCM_Normal	0.553871	0.00823314	0.0332382	Upregulated
ENG	CONTROL_Normal - HCM_Normal	0.625872	0.00673922	0.0285032	Upregulated
EPM2AIP1	HCM_Mild - HCM_Severe	-0.387708	0.00225297	0.0124521	Downregulated
EPM2AIP1	HCM_Normal - HCM_Severe	-0.38585	0.00256326	0.013698	Downregulated
EPM2AIP1	HCM_Mild - HCM_Moderate	-0.286756	0.00805893	0.0326257	Downregulated
EPM2AIP1	HCM_Normal - HCM_Moderate	-0.284898	0.00848526	0.0340269	Downregulated
ERBB2	CONTROL_Mild - HCM_Severe	-0.45596	0.00467624	0.0214687	Downregulated
ERBB2	CONTROL_Normal - HCM_Severe	-0.496372	0.0088869	0.0353041	Downregulated
ERBB2	CONTROL_Mild - HCM_Moderate	-0.374402	0.0126119	0.0460828	Downregulated
ETV1	HCM_Mild - HCM_Severe	-0.392107	3.06838e-07	8.50156e-06	Downregulated
ETV1	HCM_Normal - HCM_Severe	-0.389597	1.51093e-08	6.47543e-07	Downregulated
ETV1	CONTROL_Mild - HCM_Severe	-0.361943	0.00028612	0.00263691	Downregulated
ETV1	CONTROL_Normal - HCM_Severe	-0.35954	3.38419e-07	9.28784e-06	Downregulated
ETV1	HCM_Mild - HCM_Moderate	-0.385162	7.61904e-08	2.66208e-06	Downregulated
ETV1	HCM_Normal - HCM_Moderate	-0.382651	1.42932e-09	8.51721e-08	Downregulated
ETV1	CONTROL_Mild - HCM_Moderate	-0.354997	0.000220256	0.00212738	Downregulated
ETV1	CONTROL_Normal - HCM_Moderate	-0.352595	6.09455e-08	2.22784e-06	Downregulated
EWSR1	HCM_Mild - HCM_Severe	0.240417	0.0133546	0.0482897	Upregulated
EWSR1	HCM_Normal - HCM_Severe	0.234296	0.0128495	0.0468528	Upregulated
F13A1	CONTROL_Mild - HCM_Severe	-0.588837	2.84966e-06	5.75222e-05	Downregulated
F13A1	CONTROL_Normal - HCM_Severe	-0.74983	5.42233e-14	1.7472e-11	Downregulated
F13A1	CONTROL_Mild - HCM_Moderate	-0.550712	4.68751e-06	8.96293e-05	Downregulated
F13A1	CONTROL_Normal - HCM_Moderate	-0.711705	1.10357e-14	4.36411e-12	Downregulated
F13A1	CONTROL_Mild - HCM_Mild	-0.464058	0.000192394	0.00192173	Downregulated
F13A1	CONTROL_Normal - HCM_Mild	-0.625051	1.56224e-10	1.40612e-08	Downregulated
F13A1	CONTROL_Mild - HCM_Normal	-0.478409	5.27641e-05	0.000668191	Downregulated
F13A1	CONTROL_Normal - HCM_Normal	-0.639402	8.29511e-13	1.73482e-10	Downregulated
FGF11	CONTROL_Mild - HCM_Severe	-0.694686	0.00016359	0.00168231	Downregulated
FGF11	CONTROL_Normal - HCM_Severe	-0.630259	0.00145624	0.00902371	Downregulated
FGF11	CONTROL_Mild - HCM_Moderate	-0.67773	0.000167144	0.0017148	Downregulated
FGF11	CONTROL_Normal - HCM_Moderate	-0.613303	0.00193341	0.0110808	Downregulated
FGF11	CONTROL_Mild - HCM_Mild	-0.478906	0.00380213	0.0183362	Downregulated
FGF11	CONTROL_Normal - HCM_Mild	-0.414479	0.0103407	0.0395796	Downregulated
FGF11	CONTROL_Mild - HCM_Normal	-0.462297	0.00419942	0.0197273	Downregulated
FGF11	CONTROL_Normal - HCM_Normal	-0.397871	0.0136973	0.0491409	Downregulated
FGF18	CONTROL_Mild - HCM_Mild	-0.296944	0.00875076	0.0348269	Downregulated
FH	HCM_Moderate - HCM_Severe	0.123861	0.0128832	0.0469362	Upregulated
FLNC	CONTROL_Mild - HCM_Severe	2.11184	0.00072132	0.00541004	Upregulated
FLNC	CONTROL_Normal - HCM_Severe	2.13592	0.0013811	0.00868175	Upregulated
FLNC	CONTROL_Mild - HCM_Moderate	2.18609	0.000636624	0.00493199	Upregulated
FLNC	CONTROL_Normal - HCM_Moderate	2.21017	0.0013724	0.00865129	Upregulated
FLNC	CONTROL_Mild - HCM_Mild	1.62037	0.00307532	0.0156831	Upregulated
FLNC	CONTROL_Normal - HCM_Mild	1.64445	0.00423472	0.019861	Upregulated
FLNC	CONTROL_Mild - HCM_Normal	1.713	0.0024582	0.0132624	Upregulated
FLNC	CONTROL_Normal - HCM_Normal	1.73708	0.00381666	0.0183961	Upregulated
FYN	CONTROL_Mild - HCM_Severe	-0.297336	0.0137302	0.0492387	Downregulated
FYN	CONTROL_Mild - HCM_Moderate	-0.311733	0.00978339	0.0379303	Downregulated
FYN	CONTROL_Mild - HCM_Mild	-0.39511	0.00278324	0.0145638	Downregulated
FYN	CONTROL_Normal - HCM_Mild	-0.327336	0.0107984	0.0409708	Downregulated
FYN	CONTROL_Mild - HCM_Normal	-0.395333	0.00278386	0.0145638	Downregulated
FYN	CONTROL_Normal - HCM_Normal	-0.327559	0.0118055	0.0439485	Downregulated
FZD1	CONTROL_Normal - CONTROL_Mild	-0.216312	0.00388264	0.0186536	Downregulated
FZD6	CONTROL_Mild - HCM_Severe	-0.491567	0.000109137	0.00120954	Downregulated
FZD6	CONTROL_Normal - HCM_Severe	-0.456729	0.00132148	0.00839186	Downregulated
FZD6	CONTROL_Mild - HCM_Moderate	-0.548122	2.09743e-05	0.000319015	Downregulated
FZD6	CONTROL_Normal - HCM_Moderate	-0.513284	0.00110305	0.00735932	Downregulated
FZD6	CONTROL_Mild - HCM_Mild	-0.536721	4.4615e-05	0.000587217	Downregulated
FZD6	CONTROL_Normal - HCM_Mild	-0.501883	0.000578609	0.00457212	Downregulated
FZD6	CONTROL_Mild - HCM_Normal	-0.465458	0.000173774	0.00177117	Downregulated
FZD6	CONTROL_Normal - HCM_Normal	-0.43062	0.00263904	0.0139913	Downregulated
FZD7	CONTROL_Mild - HCM_Severe	-0.264465	0.000152169	0.00159119	Downregulated
FZD7	CONTROL_Normal - HCM_Severe	-0.265086	9.38492e-08	3.15246e-06	Downregulated
FZD7	CONTROL_Mild - HCM_Moderate	-0.296094	1.54277e-05	0.00024764	Downregulated
FZD7	CONTROL_Normal - HCM_Moderate	-0.296716	4.38722e-10	3.23464e-08	Downregulated
FZD7	CONTROL_Mild - HCM_Mild	-0.328869	8.23261e-06	0.000147374	Downregulated
FZD7	CONTROL_Normal - HCM_Mild	-0.32949	1.90002e-09	1.05288e-07	Downregulated
FZD7	CONTROL_Mild - HCM_Normal	-0.297812	1.54616e-05	0.000247727	Downregulated
FZD7	CONTROL_Normal - HCM_Normal	-0.298434	5.68322e-10	4.01984e-08	Downregulated
GAS1	HCM_Normal - HCM_Severe	-0.234929	0.00585293	0.0256011	Downregulated
GAS1	CONTROL_Mild - HCM_Severe	-0.593894	1.19972e-06	2.71811e-05	Downregulated
GAS1	CONTROL_Normal - HCM_Severe	-0.625917	0.000109348	0.00121034	Downregulated
GAS1	CONTROL_Mild - HCM_Moderate	-0.465335	2.7374e-05	0.000396923	Downregulated
GAS1	CONTROL_Normal - HCM_Moderate	-0.497358	0.000744405	0.00553213	Downregulated
GAS1	CONTROL_Mild - HCM_Mild	-0.407341	0.000287808	0.00264967	Downregulated
GAS1	CONTROL_Normal - HCM_Mild	-0.439364	0.000429813	0.00362615	Downregulated
GAS1	CONTROL_Mild - HCM_Normal	-0.358965	0.000691073	0.00523999	Downregulated
GAS1	CONTROL_Normal - HCM_Normal	-0.390987	0.00237497	0.012922	Downregulated
GBP4	HCM_Mild - HCM_Severe	-0.269177	0.000333076	0.00297511	Downregulated
GBP4	HCM_Normal - HCM_Severe	-0.297729	1.05239e-05	0.000179576	Downregulated
GBP4	CONTROL_Mild - HCM_Severe	-0.561019	4.08284e-07	1.0699e-05	Downregulated
GBP4	CONTROL_Normal - HCM_Severe	-0.511643	1.2757e-10	1.23317e-08	Downregulated
GBP4	HCM_Mild - HCM_Moderate	-0.217963	0.00142953	0.00893459	Downregulated
GBP4	HCM_Normal - HCM_Moderate	-0.246515	3.89004e-05	0.000525518	Downregulated
GBP4	CONTROL_Mild - HCM_Moderate	-0.509805	1.2802e-06	2.87055e-05	Downregulated
GBP4	CONTROL_Normal - HCM_Moderate	-0.460429	1.69013e-10	1.48527e-08	Downregulated
GBP4	CONTROL_Mild - HCM_Mild	-0.291842	0.00524021	0.0234485	Downregulated
GBP4	CONTROL_Normal - HCM_Mild	-0.242466	0.000875606	0.00620845	Downregulated
GBP4	CONTROL_Mild - HCM_Normal	-0.26329	0.00720013	0.0299718	Downregulated
GBP4	CONTROL_Normal - HCM_Normal	-0.213914	0.000724434	0.0054239	Downregulated
GIMAP6	CONTROL_Mild - HCM_Severe	-0.295019	0.00107424	0.00723807	Downregulated
GIMAP6	CONTROL_Normal - HCM_Severe	-0.310157	0.00151928	0.00928865	Downregulated
GIMAP6	CONTROL_Mild - HCM_Moderate	-0.321241	0.000310972	0.00282112	Downregulated
GIMAP6	CONTROL_Normal - HCM_Moderate	-0.336378	0.00149465	0.00916854	Downregulated
GIMAP6	CONTROL_Mild - HCM_Mild	-0.309826	0.000812081	0.0058635	Downregulated
GIMAP6	CONTROL_Normal - HCM_Mild	-0.324964	0.000862191	0.00613835	Downregulated
GIMAP6	CONTROL_Mild - HCM_Normal	-0.279034	0.00145145	0.00900043	Downregulated
GIMAP6	CONTROL_Normal - HCM_Normal	-0.294171	0.00308741	0.0157112	Downregulated
GLUD1	CONTROL_Mild - HCM_Severe	-0.311643	0.0092601	0.0363387	Downregulated
GLUD1	CONTROL_Normal - HCM_Severe	-0.341074	0.00740396	0.0306007	Downregulated
GLUD1	CONTROL_Mild - HCM_Moderate	-0.344519	0.00413504	0.0195346	Downregulated
GLUD1	CONTROL_Normal - HCM_Moderate	-0.373951	0.00508735	0.022967	Downregulated
GLUD1	CONTROL_Mild - HCM_Mild	-0.362987	0.0037081	0.0179524	Downregulated
GLUD1	CONTROL_Normal - HCM_Mild	-0.392419	0.00349995	0.0171354	Downregulated
GLUD1	CONTROL_Mild - HCM_Normal	-0.365068	0.00315857	0.0159118	Downregulated
GLUD1	CONTROL_Normal - HCM_Normal	-0.394499	0.00434962	0.0202793	Downregulated
GNAS	CONTROL_Mild - HCM_Severe	1.87566	0.0016878	0.0100299	Upregulated
GNAS	CONTROL_Normal - HCM_Severe	1.82133	0.00294332	0.0152512	Upregulated
GNAS	CONTROL_Mild - HCM_Moderate	1.83501	0.00207141	0.0117174	Upregulated
GNAS	CONTROL_Normal - HCM_Moderate	1.78069	0.00363946	0.0177385	Upregulated
GNAS	CONTROL_Mild - HCM_Mild	1.82152	0.00181393	0.0105352	Upregulated
GNAS	CONTROL_Normal - HCM_Mild	1.7672	0.00309468	0.0157175	Upregulated
GNAS	CONTROL_Mild - HCM_Normal	1.80475	0.00213726	0.0119423	Upregulated
GNAS	CONTROL_Normal - HCM_Normal	1.75042	0.0036801	0.0178566	Upregulated
GOT1	CONTROL_Mild - HCM_Severe	1.00627	4.65643e-05	0.000611025	Upregulated
GOT1	CONTROL_Normal - HCM_Severe	1.06368	0.000311373	0.00282182	Upregulated
GOT1	CONTROL_Mild - HCM_Moderate	0.955461	7.02071e-05	0.000847159	Upregulated
GOT1	CONTROL_Normal - HCM_Moderate	1.01287	0.000517755	0.0041902	Upregulated
GOT1	CONTROL_Mild - HCM_Mild	0.939924	7.2861e-05	0.000865971	Upregulated
GOT1	CONTROL_Normal - HCM_Mild	0.997332	0.000336853	0.00298434	Upregulated
GOT1	CONTROL_Mild - HCM_Normal	0.919592	0.000108873	0.00120815	Upregulated
GOT1	CONTROL_Normal - HCM_Normal	0.977	0.000627507	0.00489185	Upregulated
GOT2	HCM_Mild - HCM_Severe	0.287371	0.000642989	0.00497165	Upregulated
GOT2	HCM_Normal - HCM_Severe	0.317496	2.69284e-05	0.000393082	Upregulated
GOT2	CONTROL_Mild - HCM_Severe	1.09436	7.10941e-14	2.20899e-11	Upregulated
GOT2	CONTROL_Normal - HCM_Severe	1.10875	2.70539e-21	1.17685e-17	Upregulated
GOT2	HCM_Mild - HCM_Moderate	0.20637	0.00673197	0.0285003	Upregulated
GOT2	HCM_Normal - HCM_Moderate	0.236495	0.000361403	0.00315051	Upregulated
GOT2	CONTROL_Mild - HCM_Moderate	1.01336	2.60279e-13	6.86191e-11	Upregulated
GOT2	CONTROL_Normal - HCM_Moderate	1.02775	1.10169e-21	9.58469e-18	Upregulated
GOT2	CONTROL_Mild - HCM_Mild	0.806988	2.38293e-09	1.28767e-07	Upregulated
GOT2	CONTROL_Normal - HCM_Mild	0.82138	7.60751e-15	3.15168e-12	Upregulated
GOT2	CONTROL_Mild - HCM_Normal	0.776863	1.23708e-09	7.52631e-08	Upregulated
GOT2	CONTROL_Normal - HCM_Normal	0.791255	1.34116e-16	8.97545e-14	Upregulated
GRB2	HCM_Mild - HCM_Severe	-0.237272	0.000221642	0.00213306	Downregulated
GRB2	HCM_Normal - HCM_Severe	-0.235502	3.61383e-05	0.000493568	Downregulated
GRB2	CONTROL_Normal - HCM_Severe	-0.242545	5.22917e-05	0.000665114	Downregulated
GRB2	HCM_Mild - HCM_Moderate	-0.193367	0.000955405	0.0066337	Downregulated
GRB2	HCM_Normal - HCM_Moderate	-0.191596	0.000148916	0.0015647	Downregulated
GRB2	CONTROL_Normal - HCM_Moderate	-0.198639	0.000220563	0.00212738	Downregulated
GSK3B	HCM_Mild - HCM_Severe	-0.351184	0.00102054	0.00697465	Downregulated
GSK3B	HCM_Normal - HCM_Severe	-0.347647	0.00161254	0.00970198	Downregulated
GSK3B	HCM_Mild - HCM_Moderate	-0.337517	0.000912938	0.00639497	Downregulated
GSK3B	HCM_Normal - HCM_Moderate	-0.33398	0.00167931	0.00999317	Downregulated
HES1	HCM_Mild - HCM_Severe	-0.256566	0.0116751	0.0436104	Downregulated
HES1	HCM_Normal - HCM_Severe	-0.281692	0.00764565	0.0312727	Downregulated
HES1	CONTROL_Mild - HCM_Severe	-0.328207	0.00635754	0.0273154	Downregulated
HES1	CONTROL_Normal - HCM_Severe	-0.432047	0.00323818	0.0161771	Downregulated
HES1	CONTROL_Normal - HCM_Moderate	-0.330673	0.0113998	0.0427862	Downregulated
ICAM2	HCM_Mild - HCM_Severe	-0.195745	0.00188682	0.0108711	Downregulated
ICAM2	HCM_Normal - HCM_Severe	-0.132829	0.0140044	0.0499951	Downregulated
ICAM2	CONTROL_Mild - HCM_Severe	-0.212073	0.0136275	0.0489714	Downregulated
ICAM2	CONTROL_Normal - HCM_Severe	-0.215996	0.000254696	0.00239552	Downregulated
ICAM2	HCM_Mild - HCM_Moderate	-0.24425	4.78515e-05	0.000622284	Downregulated
ICAM2	HCM_Normal - HCM_Moderate	-0.181334	0.000299728	0.00273336	Downregulated
ICAM2	CONTROL_Mild - HCM_Moderate	-0.260578	0.00191595	0.010988	Downregulated
ICAM2	CONTROL_Normal - HCM_Moderate	-0.264501	2.33465e-06	4.8592e-05	Downregulated
ICOS	CONTROL_Mild - HCM_Severe	-0.575522	0.000160401	0.00166129	Downregulated
ICOS	CONTROL_Normal - HCM_Severe	-0.602543	0.000907329	0.00637108	Downregulated
ICOS	CONTROL_Mild - HCM_Moderate	-0.54617	0.000194158	0.00193713	Downregulated
ICOS	CONTROL_Normal - HCM_Moderate	-0.573191	0.00183093	0.0105982	Downregulated
ICOS	CONTROL_Mild - HCM_Mild	-0.531088	0.000465679	0.00384749	Downregulated
ICOS	CONTROL_Normal - HCM_Mild	-0.558109	0.000896208	0.00631337	Downregulated
ICOS	CONTROL_Mild - HCM_Normal	-0.484353	0.00079362	0.00578533	Downregulated
ICOS	CONTROL_Normal - HCM_Normal	-0.511374	0.00330512	0.0164218	Downregulated
IDH1	CONTROL_Mild - HCM_Severe	-0.520419	1.29123e-07	4.16142e-06	Downregulated
IDH1	CONTROL_Normal - HCM_Severe	-0.443841	1.95313e-10	1.66591e-08	Downregulated
IDH1	CONTROL_Mild - HCM_Moderate	-0.562571	7.51255e-09	3.42799e-07	Downregulated
IDH1	CONTROL_Normal - HCM_Moderate	-0.485993	5.18902e-13	1.18801e-10	Downregulated
IDH1	CONTROL_Mild - HCM_Mild	-0.443171	5.82882e-06	0.000107895	Downregulated
IDH1	CONTROL_Normal - HCM_Mild	-0.366593	1.3525e-07	4.29829e-06	Downregulated
IDH1	CONTROL_Mild - HCM_Normal	-0.444465	1.73094e-06	3.7554e-05	Downregulated
IDH1	CONTROL_Normal - HCM_Normal	-0.367887	3.8015e-09	1.95699e-07	Downregulated
IDH2	CONTROL_Mild - HCM_Severe	1.53188	0.000197829	0.0019625	Upregulated
IDH2	CONTROL_Normal - HCM_Severe	1.61118	0.000531333	0.00426833	Upregulated
IDH2	CONTROL_Mild - HCM_Moderate	1.43868	0.000318942	0.00287246	Upregulated
IDH2	CONTROL_Normal - HCM_Moderate	1.51798	0.000860094	0.00612843	Upregulated
IDH2	CONTROL_Mild - HCM_Mild	1.15796	0.00102597	0.00699533	Upregulated
IDH2	CONTROL_Normal - HCM_Mild	1.23726	0.00157906	0.00954814	Upregulated
IDH2	CONTROL_Mild - HCM_Normal	1.1339	0.00131074	0.00833313	Upregulated
IDH2	CONTROL_Normal - HCM_Normal	1.2132	0.0021909	0.0121872	Upregulated
IFNGR2	HCM_Mild - HCM_Severe	-0.15521	0.0117472	0.0438064	Downregulated
IFNGR2	HCM_Normal - HCM_Severe	-0.153923	0.012478	0.0457089	Downregulated
IFNGR2	CONTROL_Mild - HCM_Severe	-0.312455	0.000107651	0.00119612	Downregulated
IFNGR2	CONTROL_Normal - HCM_Severe	-0.199536	0.0101892	0.0391027	Downregulated
IFNGR2	CONTROL_Mild - HCM_Moderate	-0.286949	0.000189081	0.00189955	Downregulated
IL2RA	CONTROL_Mild - HCM_Severe	-0.509518	8.27181e-06	0.000147772	Downregulated
IL2RA	CONTROL_Normal - HCM_Severe	-0.509004	8.25267e-10	5.31839e-08	Downregulated
IL2RA	CONTROL_Mild - HCM_Moderate	-0.597702	1.57677e-07	4.8818e-06	Downregulated
IL2RA	CONTROL_Normal - HCM_Moderate	-0.597188	2.72798e-13	6.98041e-11	Downregulated
IL2RA	CONTROL_Mild - HCM_Mild	-0.573581	1.55475e-06	3.40713e-05	Downregulated
IL2RA	CONTROL_Normal - HCM_Mild	-0.573067	1.6076e-10	1.42715e-08	Downregulated
IL2RA	CONTROL_Mild - HCM_Normal	-0.555368	8.56655e-07	2.05314e-05	Downregulated
IL2RA	CONTROL_Normal - HCM_Normal	-0.554854	5.29996e-12	8.38357e-10	Downregulated
IL32	CONTROL_Mild - HCM_Severe	-0.321815	5.45001e-05	0.000687176	Downregulated
IL32	CONTROL_Normal - HCM_Severe	-0.270568	8.70655e-07	2.08096e-05	Downregulated
IL32	CONTROL_Mild - HCM_Moderate	-0.284251	0.000177051	0.00179737	Downregulated
IL32	CONTROL_Normal - HCM_Moderate	-0.233004	2.49067e-06	5.147e-05	Downregulated
IL32	CONTROL_Mild - HCM_Mild	-0.199124	0.0109758	0.0414057	Downregulated
IL32	CONTROL_Normal - HCM_Mild	-0.147877	0.0061662	0.026663	Downregulated
IL32	CONTROL_Mild - HCM_Normal	-0.254029	0.000741009	0.00551478	Downregulated
IL32	CONTROL_Normal - HCM_Normal	-0.202782	3.50683e-05	0.000481981	Downregulated
IL4R	CONTROL_Mild - HCM_Severe	-0.58801	8.88957e-08	3.02107e-06	Downregulated
IL4R	CONTROL_Normal - HCM_Severe	-0.523407	8.80274e-05	0.00101705	Downregulated
IL4R	CONTROL_Mild - HCM_Moderate	-0.551992	1.50814e-07	4.71973e-06	Downregulated
IL4R	CONTROL_Normal - HCM_Moderate	-0.487388	0.000298803	0.00272779	Downregulated
IL4R	CONTROL_Mild - HCM_Mild	-0.646815	1.74972e-08	7.38961e-07	Downregulated
IL4R	CONTROL_Normal - HCM_Mild	-0.582212	1.92113e-05	0.000294828	Downregulated
IL4R	CONTROL_Mild - HCM_Normal	-0.670857	6.1613e-09	2.94523e-07	Downregulated
IL4R	CONTROL_Normal - HCM_Normal	-0.606254	0.000137425	0.00147423	Downregulated
IRS1	CONTROL_Mild - HCM_Severe	-0.411436	0.00181399	0.0105352	Downregulated
IRS1	CONTROL_Normal - HCM_Severe	-0.378977	0.006433	0.0274753	Downregulated
IRS1	CONTROL_Mild - HCM_Moderate	-0.328475	0.00699267	0.0292904	Downregulated
ITGA9	HCM_Moderate - HCM_Severe	0.119449	0.00770955	0.0314897	Upregulated
ITGB1	CONTROL_Mild - HCM_Severe	1.00118	0.000839246	0.00601932	Upregulated
ITGB1	CONTROL_Normal - HCM_Severe	0.956479	0.00225426	0.0124521	Upregulated
ITGB1	CONTROL_Mild - HCM_Moderate	1.07552	0.000625658	0.0048862	Upregulated
ITGB1	CONTROL_Normal - HCM_Moderate	1.03082	0.00193642	0.0110908	Upregulated
ITGB1	CONTROL_Mild - HCM_Mild	1.15498	0.000344842	0.00303964	Upregulated
ITGB1	CONTROL_Normal - HCM_Mild	1.11028	0.00106157	0.0071817	Upregulated
ITGB1	CONTROL_Mild - HCM_Normal	1.22371	0.000312145	0.00282587	Upregulated
ITGB1	CONTROL_Normal - HCM_Normal	1.17901	0.00108276	0.00726851	Upregulated
JADE1	CONTROL_Mild - HCM_Severe	-0.540157	0.00365446	0.0178017	Downregulated
JADE1	CONTROL_Normal - HCM_Severe	-0.465468	0.0128633	0.0468835	Downregulated
JADE1	CONTROL_Mild - HCM_Moderate	-0.545064	0.00345387	0.0169766	Downregulated
JADE1	CONTROL_Normal - HCM_Moderate	-0.470375	0.0132626	0.0480369	Downregulated
JADE1	CONTROL_Mild - HCM_Mild	-0.530233	0.00389731	0.0186843	Downregulated
JADE1	CONTROL_Normal - HCM_Mild	-0.455544	0.0130673	0.0474678	Downregulated
JADE1	CONTROL_Mild - HCM_Normal	-0.440371	0.0101186	0.0388661	Downregulated
JAG1	CONTROL_Mild - HCM_Severe	-0.564689	0.000146548	0.00154355	Downregulated
JAG1	CONTROL_Normal - HCM_Severe	-0.47202	0.00208938	0.0117807	Downregulated
JAG1	CONTROL_Mild - HCM_Moderate	-0.468557	0.000643458	0.00497165	Downregulated
JAG1	CONTROL_Normal - HCM_Moderate	-0.375887	0.00655963	0.0279338	Downregulated
JAG1	CONTROL_Mild - HCM_Mild	-0.45179	0.00118156	0.00774645	Downregulated
JAG1	CONTROL_Normal - HCM_Mild	-0.359121	0.00735464	0.0304402	Downregulated
JAG1	CONTROL_Mild - HCM_Normal	-0.458575	0.000910122	0.00638554	Downregulated
JAG1	CONTROL_Normal - HCM_Normal	-0.365905	0.00800449	0.0324658	Downregulated
JAG2	CONTROL_Mild - HCM_Severe	-0.434434	9.6995e-05	0.00109308	Downregulated
JAG2	CONTROL_Normal - HCM_Severe	-0.386746	0.00320509	0.0160624	Downregulated
JAG2	CONTROL_Mild - HCM_Moderate	-0.362266	0.000440953	0.00368167	Downregulated
JAG2	CONTROL_Normal - HCM_Moderate	-0.314578	0.00913266	0.0360173	Downregulated
JAG2	CONTROL_Mild - HCM_Mild	-0.378999	0.000437416	0.00366751	Downregulated
JAG2	CONTROL_Normal - HCM_Mild	-0.331312	0.00441033	0.0205077	Downregulated
JAG2	CONTROL_Mild - HCM_Normal	-0.449281	6.36306e-05	0.000780798	Downregulated
JAG2	CONTROL_Normal - HCM_Normal	-0.401593	0.00467112	0.0214601	Downregulated
JAK3	CONTROL_Mild - HCM_Severe	-0.530906	0.000176676	0.00179566	Downregulated
JAK3	CONTROL_Normal - HCM_Severe	-0.580268	0.000987937	0.00680484	Downregulated
JAK3	CONTROL_Mild - HCM_Moderate	-0.481857	0.000342085	0.00301839	Downregulated
JAK3	CONTROL_Normal - HCM_Moderate	-0.531219	0.00207597	0.0117279	Downregulated
JAK3	CONTROL_Mild - HCM_Mild	-0.47169	0.000627175	0.00489185	Downregulated
JAK3	CONTROL_Normal - HCM_Mild	-0.521052	0.00120124	0.00783791	Downregulated
JAK3	CONTROL_Mild - HCM_Normal	-0.379419	0.00306483	0.0156671	Downregulated
JAK3	CONTROL_Normal - HCM_Normal	-0.428781	0.00531181	0.0236867	Downregulated
JAM3	CONTROL_Mild - HCM_Severe	-0.323663	0.000478057	0.00393481	Downregulated
JAM3	CONTROL_Normal - HCM_Severe	-0.19361	0.0135352	0.048724	Downregulated
JAM3	CONTROL_Mild - HCM_Moderate	-0.319725	0.000365246	0.0031713	Downregulated
JAM3	CONTROL_Mild - HCM_Mild	-0.382741	8.5653e-05	0.000997565	Downregulated
JAM3	CONTROL_Normal - HCM_Mild	-0.252688	0.00336793	0.0166577	Downregulated
JAM3	CONTROL_Mild - HCM_Normal	-0.372635	7.2476e-05	0.000863755	Downregulated
JAM3	CONTROL_Normal - HCM_Normal	-0.242582	0.00644743	0.0275234	Downregulated
KMT2C	HCM_Mild - HCM_Severe	-0.159272	0.001108	0.0073697	Downregulated
KMT2C	HCM_Normal - HCM_Severe	-0.148259	0.000546836	0.0043767	Downregulated
KMT2C	CONTROL_Mild - HCM_Severe	-0.179307	0.00717492	0.029895	Downregulated
KMT2C	CONTROL_Normal - HCM_Severe	-0.145148	0.00123806	0.00797355	Downregulated
KMT2C	HCM_Mild - HCM_Moderate	-0.168646	0.000224827	0.00215656	Downregulated
KMT2C	HCM_Normal - HCM_Moderate	-0.157634	5.96365e-05	0.000742191	Downregulated
KMT2C	CONTROL_Mild - HCM_Moderate	-0.188681	0.00342987	0.0168873	Downregulated
KMT2C	CONTROL_Normal - HCM_Moderate	-0.154523	0.000196372	0.00195474	Downregulated
KMT2D	HCM_Mild - HCM_Severe	-0.319886	6.29676e-06	0.000116063	Downregulated
KMT2D	HCM_Normal - HCM_Severe	-0.301857	1.4642e-06	3.24964e-05	Downregulated
KMT2D	CONTROL_Normal - HCM_Severe	-0.190206	0.0021246	0.0119022	Downregulated
KMT2D	HCM_Mild - HCM_Moderate	-0.274007	2.22884e-05	0.000336065	Downregulated
KMT2D	HCM_Normal - HCM_Moderate	-0.255977	4.29597e-06	8.32404e-05	Downregulated
KMT2D	CONTROL_Normal - HCM_Moderate	-0.144326	0.00936387	0.0366572	Downregulated
LAMP1	CONTROL_Mild - HCM_Moderate	0.208519	0.0131297	0.047615	Upregulated
LAMP1	CONTROL_Mild - HCM_Mild	0.284933	0.00231052	0.0126903	Upregulated
LAMP1	CONTROL_Normal - HCM_Mild	0.224848	0.0119505	0.0443367	Upregulated
LAMP1	CONTROL_Mild - HCM_Normal	0.249116	0.00519228	0.023309	Upregulated
LDHB	CONTROL_Mild - HCM_Severe	2.08002	0.00322462	0.0161327	Upregulated
LDHB	CONTROL_Normal - HCM_Severe	2.12791	0.00701345	0.0293351	Upregulated
LDHB	CONTROL_Mild - HCM_Moderate	2.00064	0.00418565	0.0196945	Upregulated
LDHB	CONTROL_Normal - HCM_Moderate	2.04853	0.00920362	0.0361823	Upregulated
LDHB	CONTROL_Mild - HCM_Mild	1.64619	0.00661575	0.028104	Upregulated
LDHB	CONTROL_Normal - HCM_Mild	1.69408	0.0115043	0.0431039	Upregulated
LDHB	CONTROL_Mild - HCM_Normal	1.59742	0.00848718	0.0340269	Upregulated
LGALS3	CONTROL_Mild - HCM_Severe	0.568381	0.00665603	0.0282476	Upregulated
LGALS3	CONTROL_Normal - HCM_Severe	0.532819	0.0119748	0.0443889	Upregulated
LTBP1	HCM_Normal - HCM_Severe	-0.387549	0.00906771	0.0359076	Downregulated
LTBP1	HCM_Normal - HCM_Moderate	-0.370196	0.00734304	0.0304067	Downregulated
MAP2K1	HCM_Mild - HCM_Severe	-0.327824	8.76801e-08	2.99689e-06	Downregulated
MAP2K1	HCM_Normal - HCM_Severe	-0.337645	1.35178e-09	8.1107e-08	Downregulated
MAP2K1	CONTROL_Mild - HCM_Severe	-0.233042	0.00258799	0.0138047	Downregulated
MAP2K1	CONTROL_Normal - HCM_Severe	-0.211703	6.56966e-05	0.000802415	Downregulated
MAP2K1	HCM_Mild - HCM_Moderate	-0.336013	6.79038e-09	3.19331e-07	Downregulated
MAP2K1	HCM_Normal - HCM_Moderate	-0.345834	2.84994e-11	3.70066e-09	Downregulated
MAP2K1	CONTROL_Mild - HCM_Moderate	-0.241231	0.00125617	0.00807141	Downregulated
MAP2K1	CONTROL_Normal - HCM_Moderate	-0.219892	7.67479e-06	0.000138528	Downregulated
MAP2K1	CONTROL_Normal - HCM_Normal	0.125943	0.00728039	0.0302336	Upregulated
MAP3K5	HCM_Mild - HCM_Severe	-0.416283	1.9044e-07	5.73297e-06	Downregulated
MAP3K5	HCM_Normal - HCM_Severe	-0.42168	5.28986e-09	2.5855e-07	Downregulated
MAP3K5	CONTROL_Mild - HCM_Severe	-0.407678	9.78426e-05	0.00109978	Downregulated
MAP3K5	CONTROL_Normal - HCM_Severe	-0.292408	3.09863e-05	0.000437327	Downregulated
MAP3K5	HCM_Mild - HCM_Moderate	-0.424389	1.85433e-08	7.75609e-07	Downregulated
MAP3K5	HCM_Normal - HCM_Moderate	-0.429787	1.54726e-10	1.40612e-08	Downregulated
MAP3K5	CONTROL_Mild - HCM_Moderate	-0.415785	4.08092e-05	0.000546956	Downregulated
MAP3K5	CONTROL_Normal - HCM_Moderate	-0.300515	3.79923e-06	7.46125e-05	Downregulated
MAP3K7	HCM_Moderate - HCM_Severe	0.14061	0.0107285	0.0407588	Upregulated
MAPKAPK2	CONTROL_Mild - HCM_Severe	0.75543	4.88041e-11	5.58679e-09	Upregulated
MAPKAPK2	CONTROL_Normal - HCM_Severe	0.637172	1.53274e-14	5.5562e-12	Upregulated
MAPKAPK2	CONTROL_Mild - HCM_Moderate	0.718955	6.50794e-11	6.99001e-09	Upregulated
MAPKAPK2	CONTROL_Normal - HCM_Moderate	0.600697	3.87927e-15	1.98527e-12	Upregulated
MAPKAPK2	CONTROL_Mild - HCM_Mild	0.797374	2.18731e-11	2.97337e-09	Upregulated
MAPKAPK2	CONTROL_Normal - HCM_Mild	0.679116	1.41261e-14	5.34336e-12	Upregulated
MAPKAPK2	CONTROL_Mild - HCM_Normal	0.814747	1.46098e-12	2.70438e-10	Upregulated
MAPKAPK2	CONTROL_Normal - HCM_Normal	0.696489	2.13375e-17	2.16317e-14	Upregulated
MAVS	HCM_Mild - HCM_Severe	-0.260977	0.00129924	0.00828692	Downregulated
MAVS	HCM_Normal - HCM_Severe	-0.2957	0.000702793	0.00529376	Downregulated
MAVS	HCM_Mild - HCM_Moderate	-0.225349	0.00224903	0.0124469	Downregulated
MAVS	HCM_Normal - HCM_Moderate	-0.260072	0.00115221	0.00762298	Downregulated
MAVS	CONTROL_Mild - HCM_Mild	0.277281	0.00204386	0.0115765	Upregulated
MAVS	CONTROL_Normal - HCM_Mild	0.259737	0.00489178	0.0222586	Upregulated
MAVS	CONTROL_Mild - HCM_Normal	0.312004	0.000649853	0.00500772	Upregulated
MAVS	CONTROL_Normal - HCM_Normal	0.29446	0.00391308	0.0187459	Upregulated
MCAM	HCM_Moderate - HCM_Severe	-0.143631	0.00743565	0.0306879	Downregulated
MCAM	CONTROL_Mild - HCM_Moderate	0.269355	0.0139964	0.0499873	Upregulated
MCAM	CONTROL_Mild - HCM_Normal	0.279323	0.0126305	0.0461315	Upregulated
MDM4	HCM_Mild - HCM_Severe	-0.278976	0.000103086	0.0011498	Downregulated
MDM4	HCM_Normal - HCM_Severe	-0.268498	2.38928e-05	0.000354119	Downregulated
MDM4	CONTROL_Normal - HCM_Severe	-0.206993	0.00137094	0.00864918	Downregulated
MDM4	HCM_Mild - HCM_Moderate	-0.207369	0.00137327	0.00865129	Downregulated
MDM4	HCM_Normal - HCM_Moderate	-0.196891	0.000398703	0.00341409	Downregulated
ME2	HCM_Mild - HCM_Severe	-0.282671	2.20061e-05	0.000332962	Downregulated
ME2	HCM_Normal - HCM_Severe	-0.292409	1.02319e-06	2.39939e-05	Downregulated
ME2	CONTROL_Normal - HCM_Severe	-0.163333	0.00520115	0.0233368	Downregulated
ME2	HCM_Mild - HCM_Moderate	-0.297138	2.23112e-06	4.65485e-05	Downregulated
ME2	HCM_Normal - HCM_Moderate	-0.306875	3.2316e-08	1.25513e-06	Downregulated
ME2	CONTROL_Normal - HCM_Moderate	-0.177799	0.000967311	0.00670032	Downregulated
MFGE8	HCM_Mild - HCM_Severe	-0.325177	0.0106116	0.0404382	Downregulated
MFGE8	HCM_Normal - HCM_Severe	-0.395877	0.00618924	0.0267493	Downregulated
MFGE8	CONTROL_Mild - HCM_Severe	0.631237	0.000153558	0.00159994	Upregulated
MFGE8	CONTROL_Normal - HCM_Severe	0.64984	0.00371883	0.0179843	Upregulated
MFGE8	HCM_Normal - HCM_Moderate	-0.329459	0.0108434	0.0410165	Downregulated
MFGE8	CONTROL_Mild - HCM_Moderate	0.697655	5.38799e-05	0.000680341	Upregulated
MFGE8	CONTROL_Normal - HCM_Moderate	0.716258	0.00419268	0.0197063	Upregulated
MFGE8	CONTROL_Mild - HCM_Mild	0.956414	2.51704e-06	5.18915e-05	Upregulated
MFGE8	CONTROL_Normal - HCM_Mild	0.975017	0.00058754	0.00462588	Upregulated
MFGE8	CONTROL_Mild - HCM_Normal	1.02711	2.20107e-06	4.60319e-05	Upregulated
MFGE8	CONTROL_Normal - HCM_Normal	1.04572	0.00161902	0.0097168	Upregulated
MIB1	HCM_Mild - HCM_Severe	-0.243666	0.00322469	0.0161327	Downregulated
MIB1	HCM_Normal - HCM_Severe	-0.271634	0.00201114	0.0114209	Downregulated
MIB1	CONTROL_Mild - HCM_Severe	-0.44347	2.68458e-05	0.000392536	Downregulated
MIB1	CONTROL_Normal - HCM_Severe	-0.272316	0.00584589	0.025596	Downregulated
MIB1	HCM_Mild - HCM_Moderate	-0.210048	0.00539124	0.0239549	Downregulated
MIB1	HCM_Normal - HCM_Moderate	-0.238015	0.00316719	0.0159307	Downregulated
MIB1	CONTROL_Mild - HCM_Moderate	-0.409852	4.73619e-05	0.00061696	Downregulated
MIB1	CONTROL_Normal - HCM_Moderate	-0.238697	0.0116562	0.0435899	Downregulated
MLF1	HCM_Mild - HCM_Severe	-0.330242	0.0107704	0.0408824	Downregulated
MMRN2	CONTROL_Mild - HCM_Severe	-0.274417	0.0101948	0.0391071	Downregulated
MMRN2	CONTROL_Normal - HCM_Severe	-0.273842	0.0122848	0.0451913	Downregulated
MMRN2	CONTROL_Mild - HCM_Mild	-0.336832	0.00290525	0.0150899	Downregulated
MMRN2	CONTROL_Normal - HCM_Mild	-0.336257	0.00453594	0.0209685	Downregulated
MMRN2	CONTROL_Mild - HCM_Normal	-0.328007	0.00315134	0.0158937	Downregulated
MMRN2	CONTROL_Normal - HCM_Normal	-0.327433	0.00625936	0.0269453	Downregulated
MRC1	CONTROL_Mild - HCM_Severe	-0.44683	0.00392618	0.0187709	Downregulated
MRC1	CONTROL_Normal - HCM_Severe	-0.47348	0.00299559	0.0154647	Downregulated
MRC1	CONTROL_Mild - HCM_Moderate	-0.478524	0.00157572	0.00954814	Downregulated
MRC1	CONTROL_Normal - HCM_Moderate	-0.505174	0.00317231	0.015944	Downregulated
MRC1	CONTROL_Mild - HCM_Mild	-0.398902	0.010638	0.0405212	Downregulated
MRC1	CONTROL_Normal - HCM_Mild	-0.425552	0.00413806	0.0195346	Downregulated
MRE11	CONTROL_Mild - HCM_Severe	-0.434748	1.66734e-05	0.000262312	Downregulated
MRE11	CONTROL_Normal - HCM_Severe	-0.463166	0.000266421	0.00248577	Downregulated
MRE11	CONTROL_Mild - HCM_Moderate	-0.444823	8.17644e-06	0.00014667	Downregulated
MRE11	CONTROL_Normal - HCM_Moderate	-0.473241	0.000421186	0.00356925	Downregulated
MRE11	CONTROL_Mild - HCM_Mild	-0.289842	0.00160615	0.00967026	Downregulated
MRE11	CONTROL_Normal - HCM_Mild	-0.318261	0.00143106	0.00893772	Downregulated
MRE11	CONTROL_Mild - HCM_Normal	-0.294584	0.00101763	0.00696024	Downregulated
MRE11	CONTROL_Normal - HCM_Normal	-0.323002	0.00258479	0.0137961	Downregulated
MSH6	HCM_Mild - HCM_Severe	-0.181395	0.00854232	0.034185	Downregulated
MSH6	HCM_Normal - HCM_Severe	-0.171597	0.00458005	0.0211158	Downregulated
MSH6	CONTROL_Mild - HCM_Severe	-0.562576	1.12555e-07	3.70919e-06	Downregulated
MSH6	CONTROL_Normal - HCM_Severe	-0.420078	6.44791e-09	3.04874e-07	Downregulated
MSH6	CONTROL_Mild - HCM_Moderate	-0.458586	3.34541e-06	6.62985e-05	Downregulated
MSH6	CONTROL_Normal - HCM_Moderate	-0.316088	5.26286e-07	1.3388e-05	Downregulated
MSH6	CONTROL_Mild - HCM_Mild	-0.381181	0.000180967	0.00182858	Downregulated
MSH6	CONTROL_Normal - HCM_Mild	-0.238683	0.000559683	0.00446762	Downregulated
MSH6	CONTROL_Mild - HCM_Normal	-0.39098	5.30824e-05	0.000671246	Downregulated
MSH6	CONTROL_Normal - HCM_Normal	-0.248482	5.0361e-05	0.000645451	Downregulated
MTOR	CONTROL_Mild - HCM_Severe	-0.307601	0.000810798	0.0058635	Downregulated
MTOR	CONTROL_Normal - HCM_Severe	-0.329898	0.00153404	0.00935913	Downregulated
MTOR	HCM_Mild - HCM_Moderate	-0.187333	0.00642843	0.0274753	Downregulated
MTOR	CONTROL_Mild - HCM_Moderate	-0.323998	0.000320328	0.00287601	Downregulated
MTOR	CONTROL_Normal - HCM_Moderate	-0.346295	0.00203384	0.0115273	Downregulated
MYCT1	HCM_Mild - HCM_Severe	-0.268913	0.00685031	0.0288469	Downregulated
MYCT1	CONTROL_Mild - HCM_Severe	-0.339942	0.00316783	0.0159307	Downregulated
MYCT1	CONTROL_Normal - HCM_Severe	-0.337367	0.00752183	0.0309728	Downregulated
MYCT1	HCM_Mild - HCM_Moderate	-0.255682	0.00636498	0.0273323	Downregulated
MYCT1	CONTROL_Mild - HCM_Moderate	-0.326711	0.00337335	0.016674	Downregulated
MYCT1	CONTROL_Normal - HCM_Moderate	-0.324136	0.00996739	0.038417	Downregulated
NASP	HCM_Normal - HCM_Severe	-0.164348	0.00198042	0.0112907	Downregulated
NASP	CONTROL_Mild - HCM_Severe	-0.294254	0.000569896	0.00452794	Downregulated
NASP	CONTROL_Normal - HCM_Severe	-0.292061	1.13413e-06	2.59656e-05	Downregulated
NASP	CONTROL_Mild - HCM_Moderate	-0.21136	0.00837976	0.0336597	Downregulated
NASP	CONTROL_Normal - HCM_Moderate	-0.209167	6.75751e-05	0.000819949	Downregulated
NASP	CONTROL_Normal - HCM_Mild	-0.156213	0.00802115	0.0325182	Downregulated
NASP	CONTROL_Normal - HCM_Normal	-0.127714	0.0121314	0.0448166	Downregulated
NCOR1	CONTROL_Mild - HCM_Severe	-0.338384	0.00406408	0.0192894	Downregulated
NCOR1	CONTROL_Mild - HCM_Moderate	-0.350282	0.00288493	0.0150023	Downregulated
NCOR1	CONTROL_Mild - HCM_Mild	-0.341437	0.00393592	0.0188042	Downregulated
NCOR1	CONTROL_Mild - HCM_Normal	-0.295613	0.00866568	0.0345925	Downregulated
NECTIN1	CONTROL_Mild - HCM_Severe	-0.533432	1.53028e-07	4.77184e-06	Downregulated
NECTIN1	CONTROL_Normal - HCM_Severe	-0.52791	2.39426e-12	4.16601e-10	Downregulated
NECTIN1	CONTROL_Mild - HCM_Moderate	-0.473693	8.23055e-07	1.98905e-05	Downregulated
NECTIN1	CONTROL_Normal - HCM_Moderate	-0.468171	5.27649e-12	8.38357e-10	Downregulated
NECTIN1	CONTROL_Mild - HCM_Mild	-0.40689	4.08857e-05	0.000546956	Downregulated
NECTIN1	CONTROL_Normal - HCM_Mild	-0.401368	3.47533e-08	1.33785e-06	Downregulated
NECTIN1	CONTROL_Mild - HCM_Normal	-0.405224	1.62563e-05	0.000256679	Downregulated
NECTIN1	CONTROL_Normal - HCM_Normal	-0.399702	9.63347e-10	6.02958e-08	Downregulated
NF1	HCM_Mild - HCM_Severe	-0.288291	0.000493338	0.00403388	Downregulated
NF1	HCM_Normal - HCM_Severe	-0.237728	0.00243378	0.0131597	Downregulated
NF1	CONTROL_Mild - HCM_Severe	-0.351341	0.00017728	0.0017976	Downregulated
NF1	HCM_Mild - HCM_Moderate	-0.218889	0.00233299	0.0127596	Downregulated
NF1	HCM_Normal - HCM_Moderate	-0.168326	0.0103013	0.0394634	Downregulated
NF1	CONTROL_Mild - HCM_Moderate	-0.281939	0.00120232	0.00783791	Downregulated
NFKB1	CONTROL_Mild - HCM_Severe	-0.342983	0.000149418	0.00156808	Downregulated
NFKB1	CONTROL_Normal - HCM_Severe	-0.370597	1.5049e-08	6.47543e-07	Downregulated
NFKB1	CONTROL_Mild - HCM_Moderate	-0.36502	3.40612e-05	0.000470369	Downregulated
NFKB1	CONTROL_Normal - HCM_Moderate	-0.392634	2.36175e-10	1.94407e-08	Downregulated
NFKB1	CONTROL_Mild - HCM_Mild	-0.303193	0.000924208	0.00645832	Downregulated
NFKB1	CONTROL_Normal - HCM_Mild	-0.330807	7.95497e-07	1.92781e-05	Downregulated
NFKB1	CONTROL_Mild - HCM_Normal	-0.36896	3.15998e-05	0.000444852	Downregulated
NFKB1	CONTROL_Normal - HCM_Normal	-0.396574	2.72305e-10	2.17345e-08	Downregulated
NFKB2	CONTROL_Mild - HCM_Severe	-0.495513	4.81557e-06	9.1675e-05	Downregulated
NFKB2	CONTROL_Normal - HCM_Severe	-0.42448	2.10103e-08	8.54157e-07	Downregulated
NFKB2	CONTROL_Mild - HCM_Moderate	-0.403445	7.11633e-05	0.000853849	Downregulated
NFKB2	CONTROL_Normal - HCM_Moderate	-0.332411	6.07602e-07	1.52338e-05	Downregulated
NFKB2	CONTROL_Mild - HCM_Mild	-0.47565	1.59187e-05	0.00025256	Downregulated
NFKB2	CONTROL_Normal - HCM_Mild	-0.404617	2.64946e-07	7.59329e-06	Downregulated
NFKB2	CONTROL_Mild - HCM_Normal	-0.45907	1.01553e-05	0.000175081	Downregulated
NFKB2	CONTROL_Normal - HCM_Normal	-0.388037	2.60017e-08	1.03913e-06	Downregulated
NFKBIZ	CONTROL_Mild - HCM_Severe	-0.52692	1.91295e-07	5.73884e-06	Downregulated
NFKBIZ	CONTROL_Normal - HCM_Severe	-0.463078	1.35483e-10	1.26742e-08	Downregulated
NFKBIZ	CONTROL_Mild - HCM_Moderate	-0.466895	1.0534e-06	2.44389e-05	Downregulated
NFKBIZ	CONTROL_Normal - HCM_Moderate	-0.403053	4.70607e-10	3.44057e-08	Downregulated
NFKBIZ	CONTROL_Mild - HCM_Mild	-0.47418	2.92441e-06	5.87583e-05	Downregulated
NFKBIZ	CONTROL_Normal - HCM_Mild	-0.410338	1.91984e-08	7.95364e-07	Downregulated
NFKBIZ	CONTROL_Mild - HCM_Normal	-0.475059	8.36394e-07	2.01569e-05	Downregulated
NFKBIZ	CONTROL_Normal - HCM_Normal	-0.411216	4.06117e-10	3.04587e-08	Downregulated
NID2	CONTROL_Mild - HCM_Severe	-0.355671	0.00316658	0.0159307	Downregulated
NID2	CONTROL_Normal - HCM_Severe	-0.344419	0.0061522	0.0266554	Downregulated
NLRC5	CONTROL_Mild - HCM_Severe	-0.459275	0.000240463	0.00228637	Downregulated
NLRC5	CONTROL_Normal - HCM_Severe	-0.406662	0.00265317	0.0140401	Downregulated
NLRC5	CONTROL_Mild - HCM_Moderate	-0.477638	0.000128382	0.00139441	Downregulated
NLRC5	CONTROL_Normal - HCM_Moderate	-0.425025	0.00266421	0.0140732	Downregulated
NLRC5	CONTROL_Mild - HCM_Mild	-0.360055	0.00212883	0.0119182	Downregulated
NLRC5	CONTROL_Normal - HCM_Mild	-0.307442	0.00832262	0.0334906	Downregulated
NLRC5	CONTROL_Mild - HCM_Normal	-0.381567	0.0011484	0.00760935	Downregulated
NLRC5	CONTROL_Normal - HCM_Normal	-0.328954	0.00815449	0.0329432	Downregulated
NOTCH1	CONTROL_Normal - HCM_Severe	-0.194954	0.000736497	0.00549059	Downregulated
NOTCH1	CONTROL_Normal - HCM_Normal	-0.151049	0.00400011	0.0190481	Downregulated
NOTCH2	HCM_Normal - HCM_Severe	-0.281247	0.0120125	0.044455	Downregulated
NOTCH2	CONTROL_Mild - HCM_Severe	-0.360416	0.00917086	0.0361168	Downregulated
NOTCH2	HCM_Normal - HCM_Moderate	-0.282468	0.00840515	0.0337399	Downregulated
NOTCH2	CONTROL_Mild - HCM_Moderate	-0.361637	0.00758855	0.031131	Downregulated
NTF3	CONTROL_Mild - HCM_Severe	-0.538886	7.44162e-05	0.000877265	Downregulated
NTF3	CONTROL_Normal - HCM_Severe	-0.497217	0.00110478	0.0073652	Downregulated
NTF3	CONTROL_Mild - HCM_Moderate	-0.599888	1.33721e-05	0.000218679	Downregulated
NTF3	CONTROL_Normal - HCM_Moderate	-0.558219	0.000952949	0.00662193	Downregulated
NTF3	CONTROL_Mild - HCM_Mild	-0.611481	1.78525e-05	0.000278345	Downregulated
NTF3	CONTROL_Normal - HCM_Mild	-0.569811	0.000364074	0.00316744	Downregulated
NTF3	CONTROL_Mild - HCM_Normal	-0.542139	6.05792e-05	0.000751838	Downregulated
NTF3	CONTROL_Normal - HCM_Normal	-0.500469	0.00174869	0.0102725	Downregulated
NTRK2	HCM_Mild - HCM_Severe	-0.244598	0.00793985	0.0322487	Downregulated
NTRK2	CONTROL_Mild - HCM_Severe	-0.636372	1.68421e-06	3.67233e-05	Downregulated
NTRK2	CONTROL_Normal - HCM_Severe	-0.580535	0.000327566	0.00293109	Downregulated
NTRK2	CONTROL_Mild - HCM_Moderate	-0.553645	7.73128e-06	0.000139259	Downregulated
NTRK2	CONTROL_Normal - HCM_Moderate	-0.497808	0.00113779	0.00755057	Downregulated
NTRK2	CONTROL_Mild - HCM_Mild	-0.391774	0.000727145	0.00543474	Downregulated
NTRK2	CONTROL_Normal - HCM_Mild	-0.335937	0.00371563	0.0179789	Downregulated
NTRK2	CONTROL_Mild - HCM_Normal	-0.42774	0.000218105	0.00211776	Downregulated
NTRK2	CONTROL_Normal - HCM_Normal	-0.371903	0.00419184	0.0197063	Downregulated
NUMBL	HCM_Mild - HCM_Severe	-0.269921	9.29637e-05	0.00105951	Downregulated
NUMBL	HCM_Normal - HCM_Severe	-0.201514	0.000668481	0.00510384	Downregulated
NUMBL	CONTROL_Mild - HCM_Severe	-0.371446	0.000104632	0.00116407	Downregulated
NUMBL	CONTROL_Normal - HCM_Severe	-0.317598	1.53602e-06	3.38314e-05	Downregulated
NUMBL	HCM_Mild - HCM_Moderate	-0.235677	0.000197321	0.00196193	Downregulated
NUMBL	HCM_Normal - HCM_Moderate	-0.167269	0.00152799	0.00932877	Downregulated
NUMBL	CONTROL_Mild - HCM_Moderate	-0.337201	0.000223508	0.00214635	Downregulated
NUMBL	CONTROL_Normal - HCM_Moderate	-0.283353	2.18308e-06	4.57659e-05	Downregulated
NUP107	CONTROL_Mild - HCM_Severe	-0.38835	0.000887371	0.00627143	Downregulated
NUP107	CONTROL_Normal - HCM_Severe	-0.375972	0.0039268	0.0187709	Downregulated
NUP107	CONTROL_Mild - HCM_Moderate	-0.404881	0.000521874	0.00421961	Downregulated
NUP107	CONTROL_Normal - HCM_Moderate	-0.392504	0.00389459	0.0186843	Downregulated
NUP107	CONTROL_Mild - HCM_Mild	-0.353891	0.00191037	0.0109632	Downregulated
NUP107	CONTROL_Normal - HCM_Mild	-0.341514	0.0051578	0.0232192	Downregulated
NUP107	CONTROL_Mild - HCM_Normal	-0.317698	0.00366692	0.0178177	Downregulated
NUP107	CONTROL_Normal - HCM_Normal	-0.30532	0.0108125	0.0409804	Downregulated
OAS2	HCM_Mild - HCM_Severe	-0.348596	0.000766211	0.00563486	Downregulated
OAS2	HCM_Normal - HCM_Severe	-0.33896	0.00118132	0.00774645	Downregulated
OAS2	CONTROL_Mild - HCM_Severe	-0.462784	0.000119695	0.00131151	Downregulated
OAS2	CONTROL_Normal - HCM_Severe	-0.379876	0.00217844	0.0121412	Downregulated
OAS2	HCM_Mild - HCM_Moderate	-0.294581	0.00164856	0.00986413	Downregulated
OAS2	HCM_Normal - HCM_Moderate	-0.284946	0.0024157	0.0130781	Downregulated
OAS2	CONTROL_Mild - HCM_Moderate	-0.408769	0.000322529	0.0028898	Downregulated
OAS2	CONTROL_Normal - HCM_Moderate	-0.325862	0.00544912	0.0241651	Downregulated
PARP4	CONTROL_Mild - HCM_Severe	-0.327518	0.00481124	0.0219695	Downregulated
PARP4	CONTROL_Normal - HCM_Severe	-0.323714	0.00777849	0.0317118	Downregulated
PARP4	CONTROL_Mild - HCM_Moderate	-0.281241	0.0103491	0.039594	Downregulated
PARP9	HCM_Normal - HCM_Severe	-0.17451	0.00227427	0.0125467	Downregulated
PARP9	CONTROL_Mild - HCM_Severe	-0.474426	1.1193e-06	2.57407e-05	Downregulated
PARP9	CONTROL_Normal - HCM_Severe	-0.468181	5.1877e-11	5.69454e-09	Downregulated
PARP9	CONTROL_Mild - HCM_Moderate	-0.394861	1.54043e-05	0.00024764	Downregulated
PARP9	CONTROL_Normal - HCM_Moderate	-0.388616	7.28855e-10	4.7677e-08	Downregulated
PARP9	CONTROL_Mild - HCM_Mild	-0.391663	5.12096e-05	0.000655181	Downregulated
PARP9	CONTROL_Normal - HCM_Mild	-0.385417	5.24947e-08	1.92702e-06	Downregulated
PARP9	CONTROL_Mild - HCM_Normal	-0.299917	0.00072594	0.00543051	Downregulated
PARP9	CONTROL_Normal - HCM_Normal	-0.293672	8.92138e-07	2.12647e-05	Downregulated
PBX3	HCM_Mild - HCM_Severe	-0.246956	0.0118078	0.0439485	Downregulated
PBX3	HCM_Mild - HCM_Moderate	-0.231142	0.0117707	0.0438564	Downregulated
PDGFA	HCM_Mild - HCM_Severe	-0.20962	0.000828969	0.00595544	Downregulated
PDGFA	HCM_Normal - HCM_Severe	-0.270962	2.62998e-06	5.37109e-05	Downregulated
PDGFA	CONTROL_Mild - HCM_Severe	-0.325576	0.000217951	0.00211776	Downregulated
PDGFA	CONTROL_Normal - HCM_Severe	-0.316112	3.48538e-07	9.40873e-06	Downregulated
PDGFA	HCM_Mild - HCM_Moderate	-0.218698	0.000191504	0.00191725	Downregulated
PDGFA	HCM_Normal - HCM_Moderate	-0.280039	1.42587e-07	4.49459e-06	Downregulated
PDGFA	CONTROL_Mild - HCM_Moderate	-0.334653	8.74198e-05	0.00101272	Downregulated
PDGFA	CONTROL_Normal - HCM_Moderate	-0.325189	1.99576e-08	8.22894e-07	Downregulated
PDGFB	CONTROL_Mild - HCM_Severe	-0.289911	0.00744547	0.0307139	Downregulated
PDGFB	CONTROL_Normal - HCM_Severe	-0.28416	0.0130276	0.0473734	Downregulated
PDGFD	HCM_Mild - HCM_Severe	-0.296386	7.44078e-05	0.000877265	Downregulated
PDGFD	HCM_Normal - HCM_Severe	-0.30681	4.65077e-06	8.91226e-05	Downregulated
PDGFD	CONTROL_Mild - HCM_Severe	-0.444416	2.2887e-05	0.000343306	Downregulated
PDGFD	CONTROL_Normal - HCM_Severe	-0.449526	3.08421e-09	1.61642e-07	Downregulated
PDGFD	HCM_Mild - HCM_Moderate	-0.182515	0.0060072	0.0261183	Downregulated
PDGFD	HCM_Normal - HCM_Moderate	-0.192939	0.00077484	0.00568641	Downregulated
PDGFD	CONTROL_Mild - HCM_Moderate	-0.330545	0.000720289	0.00541004	Downregulated
PDGFD	CONTROL_Normal - HCM_Moderate	-0.335656	3.41539e-07	9.29181e-06	Downregulated
PDGFRB	CONTROL_Normal - HCM_Severe	-0.170823	0.00661384	0.028104	Downregulated
PDGFRB	CONTROL_Normal - HCM_Moderate	-0.146558	0.0100654	0.0386961	Downregulated
PIK3CA	CONTROL_Mild - HCM_Severe	-0.352939	0.00102821	0.00699533	Downregulated
PIK3CA	CONTROL_Normal - HCM_Severe	-0.268997	0.00968225	0.0376724	Downregulated
PIK3CA	HCM_Mild - HCM_Moderate	-0.206537	0.0105087	0.0400814	Downregulated
PIK3CA	HCM_Normal - HCM_Moderate	-0.22058	0.00762798	0.0312299	Downregulated
PIK3CA	CONTROL_Mild - HCM_Moderate	-0.463446	3.6958e-05	0.000501614	Downregulated
PIK3CA	CONTROL_Normal - HCM_Moderate	-0.379504	0.00313988	0.0158451	Downregulated
PIK3CA	CONTROL_Mild - HCM_Mild	-0.256909	0.0133915	0.0483629	Downregulated
PIK3R2	HCM_Normal - HCM_Severe	-0.270765	0.00442567	0.020568	Downregulated
PIK3R2	CONTROL_Mild - HCM_Severe	-0.408063	0.000674959	0.00513748	Downregulated
PIK3R2	CONTROL_Normal - HCM_Severe	-0.483349	0.000812803	0.0058635	Downregulated
PIK3R2	CONTROL_Mild - HCM_Moderate	-0.304294	0.00508421	0.0229661	Downregulated
PIK3R2	CONTROL_Normal - HCM_Moderate	-0.37958	0.0031153	0.0157852	Downregulated
PIK3R2	CONTROL_Normal - HCM_Mild	-0.270424	0.0131047	0.0475442	Downregulated
PKM	CONTROL_Mild - HCM_Severe	0.559314	0.011936	0.0443018	Upregulated
PKM	CONTROL_Normal - HCM_Severe	0.608952	0.00995116	0.0384095	Upregulated
PKM	CONTROL_Mild - HCM_Mild	0.545067	0.013381	0.0483629	Upregulated
PKM	CONTROL_Normal - HCM_Mild	0.594704	0.0106832	0.040658	Upregulated
PLA2G4C	HCM_Normal - HCM_Severe	-0.154395	0.00555699	0.024541	Downregulated
PLA2G4C	CONTROL_Mild - HCM_Severe	-0.243498	0.00592297	0.0258499	Downregulated
PLA2G4C	CONTROL_Normal - HCM_Severe	-0.186739	0.00165953	0.00990936	Downregulated
PLA2G4C	HCM_Mild - HCM_Moderate	-0.208877	0.00051077	0.00415015	Downregulated
PLA2G4C	HCM_Normal - HCM_Moderate	-0.213269	4.34385e-05	0.000573644	Downregulated
PLA2G4C	CONTROL_Mild - HCM_Moderate	-0.302372	0.00049867	0.00406982	Downregulated
PLA2G4C	CONTROL_Normal - HCM_Moderate	-0.245612	1.30455e-05	0.000214548	Downregulated
PLAU	CONTROL_Mild - HCM_Severe	-0.513078	0.00157989	0.00954814	Downregulated
PLAU	CONTROL_Normal - HCM_Severe	-0.514876	0.00334187	0.0165665	Downregulated
PLAU	CONTROL_Mild - HCM_Moderate	-0.558538	0.000746194	0.00553915	Downregulated
PLAU	CONTROL_Normal - HCM_Moderate	-0.560336	0.00247094	0.0133109	Downregulated
PLCB4	CONTROL_Mild - HCM_Moderate	-0.337783	0.00986224	0.0381679	Downregulated
PLCE1	HCM_Mild - HCM_Severe	-0.367564	1.32878e-06	2.97182e-05	Downregulated
PLCE1	HCM_Normal - HCM_Severe	-0.331722	6.77487e-07	1.68404e-05	Downregulated
PLCE1	CONTROL_Normal - HCM_Severe	-0.207844	0.00154848	0.00942082	Downregulated
PLCE1	HCM_Mild - HCM_Moderate	-0.345935	8.989e-07	2.13673e-05	Downregulated
PLCE1	HCM_Normal - HCM_Moderate	-0.310093	2.8689e-07	8.05144e-06	Downregulated
PLCE1	CONTROL_Normal - HCM_Moderate	-0.186215	0.00177597	0.0103977	Downregulated
PLD1	HCM_Mild - HCM_Severe	-0.212367	0.00115351	0.0076258	Downregulated
PLD1	HCM_Normal - HCM_Severe	-0.273985	4.84351e-06	9.20056e-05	Downregulated
PLD1	CONTROL_Mild - HCM_Severe	-0.361492	9.64253e-05	0.00108948	Downregulated
PLD1	CONTROL_Normal - HCM_Severe	-0.305022	1.77467e-06	3.82169e-05	Downregulated
PLD1	HCM_Mild - HCM_Moderate	-0.222779	0.000265859	0.00248439	Downregulated
PLD1	HCM_Normal - HCM_Moderate	-0.284397	2.68297e-07	7.59941e-06	Downregulated
PLD1	CONTROL_Mild - HCM_Moderate	-0.371904	3.51324e-05	0.0004821	Downregulated
PLD1	CONTROL_Normal - HCM_Moderate	-0.315435	1.16438e-07	3.8083e-06	Downregulated
POU2AF1	CONTROL_Mild - HCM_Severe	-0.36301	1.14232e-05	0.000191857	Downregulated
POU2AF1	CONTROL_Normal - HCM_Severe	-0.40254	6.84561e-11	7.26303e-09	Downregulated
POU2AF1	CONTROL_Mild - HCM_Moderate	-0.339493	1.79157e-05	0.000278831	Downregulated
POU2AF1	CONTROL_Normal - HCM_Moderate	-0.379023	2.28366e-11	3.05659e-09	Downregulated
POU2AF1	CONTROL_Mild - HCM_Mild	-0.278284	0.000687306	0.00521777	Downregulated
POU2AF1	CONTROL_Normal - HCM_Mild	-0.317814	1.68739e-07	5.18739e-06	Downregulated
POU2AF1	CONTROL_Mild - HCM_Normal	-0.336949	2.22878e-05	0.000336065	Downregulated
POU2AF1	CONTROL_Normal - HCM_Normal	-0.376479	4.4543e-11	5.32503e-09	Downregulated
PPARGC1B	CONTROL_Mild - HCM_Severe	-0.389734	0.00318831	0.0159885	Downregulated
PPARGC1B	CONTROL_Normal - HCM_Severe	-0.320264	0.0138804	0.0496952	Downregulated
PPARGC1B	CONTROL_Mild - HCM_Moderate	-0.428284	0.00148071	0.00912337	Downregulated
PPARGC1B	CONTROL_Normal - HCM_Moderate	-0.358814	0.00909908	0.0359676	Downregulated
PPARGC1B	CONTROL_Mild - HCM_Mild	-0.31572	0.0116896	0.0436104	Downregulated
PPARGC1B	CONTROL_Mild - HCM_Normal	-0.374198	0.00404435	0.0192063	Downregulated
PPP3CA	HCM_Mild - HCM_Severe	-0.24715	6.72462e-05	0.00081824	Downregulated
PPP3CA	HCM_Normal - HCM_Severe	-0.26773	1.73584e-06	3.75667e-05	Downregulated
PPP3CA	CONTROL_Mild - HCM_Severe	-0.466661	2.61512e-07	7.53362e-06	Downregulated
PPP3CA	CONTROL_Normal - HCM_Severe	-0.421392	9.23769e-11	9.56761e-09	Downregulated
PPP3CA	HCM_Mild - HCM_Moderate	-0.222817	9.41303e-05	0.0010691	Downregulated
PPP3CA	HCM_Normal - HCM_Moderate	-0.243397	1.35002e-06	3.01158e-05	Downregulated
PPP3CA	CONTROL_Mild - HCM_Moderate	-0.442328	3.5015e-07	9.40873e-06	Downregulated
PPP3CA	CONTROL_Normal - HCM_Moderate	-0.397059	3.0429e-11	3.89312e-09	Downregulated
PPP3CA	CONTROL_Mild - HCM_Mild	-0.219512	0.00958216	0.0373628	Downregulated
PPP3CA	CONTROL_Normal - HCM_Mild	-0.174242	0.00300927	0.0154915	Downregulated
PPP3CA	CONTROL_Mild - HCM_Normal	-0.198931	0.012301	0.0452126	Downregulated
PPP3CA	CONTROL_Normal - HCM_Normal	-0.153661	0.0025835	0.0137961	Downregulated
PPP3CC	CONTROL_Mild - HCM_Severe	-0.302161	0.011967	0.044379	Downregulated
PPP3CC	CONTROL_Normal - HCM_Severe	-0.31295	0.0122376	0.045094	Downregulated
PPP3CC	CONTROL_Mild - HCM_Moderate	-0.2948	0.0119892	0.0444233	Downregulated
PPP3CC	CONTROL_Normal - HCM_Moderate	-0.305588	0.0133913	0.0483629	Downregulated
PPP3R1	HCM_Mild - HCM_Severe	-0.362951	0.00079086	0.00577221	Downregulated
PPP3R1	HCM_Normal - HCM_Severe	-0.316034	0.00228134	0.0125659	Downregulated
PPP3R1	HCM_Mild - HCM_Moderate	-0.301545	0.001865	0.0107656	Downregulated
PPP3R1	HCM_Normal - HCM_Moderate	-0.254628	0.0053952	0.0239603	Downregulated
PRKACA	CONTROL_Mild - HCM_Severe	0.779637	5.55673e-07	1.40534e-05	Upregulated
PRKACA	CONTROL_Normal - HCM_Severe	0.770997	0.000186842	0.00187922	Upregulated
PRKACA	HCM_Normal - HCM_Moderate	-0.249179	0.0104852	0.0400267	Downregulated
PRKACA	CONTROL_Mild - HCM_Moderate	0.726375	1.02211e-06	2.39939e-05	Upregulated
PRKACA	CONTROL_Normal - HCM_Moderate	0.717735	0.000561277	0.00446762	Upregulated
PRKACA	CONTROL_Mild - HCM_Mild	0.955179	1.88656e-08	7.85316e-07	Upregulated
PRKACA	CONTROL_Normal - HCM_Mild	0.946538	2.6799e-05	0.00039251	Upregulated
PRKACA	CONTROL_Mild - HCM_Normal	0.975554	1.34603e-08	5.85525e-07	Upregulated
PRKACA	CONTROL_Normal - HCM_Normal	0.966914	0.000205419	0.00202395	Upregulated
PRKCE	HCM_Mild - HCM_Severe	-0.206356	0.00759723	0.0311436	Downregulated
PRKCE	HCM_Normal - HCM_Severe	-0.208387	0.00224004	0.012413	Downregulated
PRKCE	CONTROL_Mild - HCM_Severe	-0.484801	1.83491e-05	0.000283547	Downregulated
PRKCE	CONTROL_Normal - HCM_Severe	-0.440098	3.38555e-08	1.30908e-06	Downregulated
PRKCE	HCM_Mild - HCM_Moderate	-0.248618	0.000646368	0.00498971	Downregulated
PRKCE	HCM_Normal - HCM_Moderate	-0.250649	7.11217e-05	0.000853849	Downregulated
PRKCE	CONTROL_Mild - HCM_Moderate	-0.527063	2.03826e-06	4.3251e-05	Downregulated
PRKCE	CONTROL_Normal - HCM_Moderate	-0.48236	2.3033e-10	1.9268e-08	Downregulated
PRKCE	CONTROL_Mild - HCM_Mild	-0.278446	0.0113348	0.0425606	Downregulated
PRKCE	CONTROL_Normal - HCM_Mild	-0.233742	0.00225105	0.0124502	Downregulated
PRKCE	CONTROL_Mild - HCM_Normal	-0.276414	0.00767108	0.031362	Downregulated
PRKCE	CONTROL_Normal - HCM_Normal	-0.231711	0.000559964	0.00446762	Downregulated
PRKDC	CONTROL_Normal - HCM_Severe	-0.256362	3.01195e-05	0.000430279	Downregulated
PRKDC	CONTROL_Mild - HCM_Moderate	-0.220499	0.0091213	0.0360173	Downregulated
PRKDC	CONTROL_Normal - HCM_Moderate	-0.266127	3.04853e-06	6.11111e-05	Downregulated
PRKDC	CONTROL_Normal - HCM_Mild	-0.23208	0.000288619	0.00265151	Downregulated
PRKDC	CONTROL_Normal - HCM_Normal	-0.229591	4.72085e-05	0.000616688	Downregulated
PRUNE1	CONTROL_Mild - HCM_Severe	-0.355487	0.00039563	0.00339446	Downregulated
PRUNE1	CONTROL_Normal - HCM_Severe	-0.350354	0.00264657	0.0140141	Downregulated
PRUNE1	CONTROL_Mild - HCM_Moderate	-0.299037	0.0013797	0.00867924	Downregulated
PRUNE1	CONTROL_Normal - HCM_Moderate	-0.293904	0.00670705	0.0284502	Downregulated
PRUNE1	CONTROL_Mild - HCM_Normal	-0.250576	0.00584439	0.025596	Downregulated
PRUNE1	CONTROL_Normal - HCM_Normal	-0.245443	0.013805	0.0494458	Downregulated
PSEN1	CONTROL_Mild - HCM_Severe	-0.339855	0.000511375	0.00415015	Downregulated
PSEN1	CONTROL_Normal - HCM_Severe	-0.351901	0.00120037	0.00783791	Downregulated
PSEN1	CONTROL_Mild - HCM_Moderate	-0.424805	2.33861e-05	0.000347794	Downregulated
PSEN1	CONTROL_Normal - HCM_Moderate	-0.436852	0.000696681	0.00527198	Downregulated
PSEN1	CONTROL_Mild - HCM_Mild	-0.398639	0.000104197	0.00116071	Downregulated
PSEN1	CONTROL_Normal - HCM_Mild	-0.410685	0.000335411	0.00298372	Downregulated
PSEN1	CONTROL_Mild - HCM_Normal	-0.390517	8.59128e-05	0.000999253	Downregulated
PSEN1	CONTROL_Normal - HCM_Normal	-0.402564	0.00117684	0.00772717	Downregulated
PSEN2	HCM_Normal - HCM_Severe	-0.250239	0.00996339	0.038417	Downregulated
PSEN2	CONTROL_Mild - HCM_Severe	-0.476595	0.000216914	0.00211564	Downregulated
PSEN2	CONTROL_Normal - HCM_Severe	-0.528901	0.000631681	0.00491848	Downregulated
PSEN2	HCM_Normal - HCM_Moderate	-0.248447	0.00753932	0.0309728	Downregulated
PSEN2	CONTROL_Mild - HCM_Moderate	-0.474803	0.000153359	0.00159979	Downregulated
PSEN2	CONTROL_Normal - HCM_Moderate	-0.527109	0.00102803	0.00699533	Downregulated
PSEN2	CONTROL_Normal - HCM_Mild	-0.324084	0.00613276	0.0265845	Downregulated
PSMB7	HCM_Mild - HCM_Moderate	-0.282404	0.00446739	0.0207398	Downregulated
PSMB7	HCM_Normal - HCM_Moderate	-0.322898	0.000834449	0.00598986	Downregulated
PSMB9	CONTROL_Mild - HCM_Severe	-0.479971	0.000509248	0.00414449	Downregulated
PSMB9	CONTROL_Normal - HCM_Severe	-0.427059	0.00492945	0.0223949	Downregulated
PSMB9	CONTROL_Mild - HCM_Moderate	-0.482453	0.000418679	0.00355713	Downregulated
PSMB9	CONTROL_Normal - HCM_Moderate	-0.429542	0.00572178	0.0251412	Downregulated
PSMB9	CONTROL_Mild - HCM_Mild	-0.483201	0.000482953	0.00397136	Downregulated
PSMB9	CONTROL_Normal - HCM_Mild	-0.430289	0.00402294	0.0191255	Downregulated
PSMB9	CONTROL_Mild - HCM_Normal	-0.47063	0.000610619	0.00479025	Downregulated
PSMB9	CONTROL_Normal - HCM_Normal	-0.417719	0.00676706	0.0285793	Downregulated
PTGER4	CONTROL_Mild - HCM_Severe	-0.406372	0.00335938	0.0166326	Downregulated
PTGER4	CONTROL_Normal - HCM_Severe	-0.383972	0.00731569	0.0303512	Downregulated
PTGER4	CONTROL_Mild - HCM_Moderate	-0.424567	0.00232111	0.0127244	Downregulated
PTGER4	CONTROL_Normal - HCM_Moderate	-0.402168	0.00622893	0.0268276	Downregulated
PTGER4	CONTROL_Mild - HCM_Mild	-0.406264	0.00341286	0.0168417	Downregulated
PTGER4	CONTROL_Normal - HCM_Mild	-0.383864	0.00695415	0.0291853	Downregulated
PTGER4	CONTROL_Mild - HCM_Normal	-0.386022	0.00455705	0.0210437	Downregulated
PTGER4	CONTROL_Normal - HCM_Normal	-0.363623	0.00990066	0.0382486	Downregulated
PTPN11	CONTROL_Mild - HCM_Mild	0.676755	0.00436241	0.0202957	Upregulated
PTPN11	CONTROL_Normal - HCM_Mild	0.670952	0.00592467	0.0258499	Upregulated
PTPN11	CONTROL_Mild - HCM_Normal	0.684887	0.00427843	0.0200335	Upregulated
PTPN11	CONTROL_Normal - HCM_Normal	0.679084	0.00613053	0.0265845	Upregulated
PTPN5	CONTROL_Mild - HCM_Severe	-0.669635	0.00017386	0.00177117	Downregulated
PTPN5	CONTROL_Normal - HCM_Severe	-0.641355	0.00156271	0.00948752	Downregulated
PTPN5	CONTROL_Mild - HCM_Moderate	-0.743004	5.91033e-05	0.000737731	Downregulated
PTPN5	CONTROL_Normal - HCM_Moderate	-0.714724	0.00123295	0.00795744	Downregulated
PTPN5	CONTROL_Mild - HCM_Mild	-0.734779	7.2989e-05	0.000866308	Downregulated
PTPN5	CONTROL_Normal - HCM_Mild	-0.706499	0.000777617	0.00569947	Downregulated
PTPN5	CONTROL_Mild - HCM_Normal	-0.723538	9.41172e-05	0.0010691	Downregulated
PTPN5	CONTROL_Normal - HCM_Normal	-0.695258	0.00149647	0.00916854	Downregulated
PURA	CONTROL_Mild - HCM_Severe	-0.347584	0.00497011	0.0225443	Downregulated
PURA	CONTROL_Mild - HCM_Moderate	-0.417882	0.00122999	0.00795313	Downregulated
PURA	CONTROL_Normal - HCM_Moderate	-0.316838	0.0124491	0.0456222	Downregulated
PURA	CONTROL_Mild - HCM_Mild	-0.315631	0.00932253	0.0365342	Downregulated
PURA	CONTROL_Mild - HCM_Normal	-0.359873	0.00385999	0.0185741	Downregulated
PVR	CONTROL_Mild - HCM_Severe	-0.391884	0.00122103	0.00791574	Downregulated
PVR	CONTROL_Normal - HCM_Severe	-0.367181	0.00445756	0.0207052	Downregulated
PVR	CONTROL_Mild - HCM_Moderate	-0.391253	0.000934775	0.00652169	Downregulated
PVR	CONTROL_Normal - HCM_Moderate	-0.36655	0.00529427	0.0236327	Downregulated
PVR	CONTROL_Mild - HCM_Mild	-0.412986	0.000866018	0.00615552	Downregulated
PVR	CONTROL_Normal - HCM_Mild	-0.388282	0.00286667	0.0149431	Downregulated
PVR	CONTROL_Mild - HCM_Normal	-0.498408	0.000110181	0.00121801	Downregulated
PVR	CONTROL_Normal - HCM_Normal	-0.473705	0.00209145	0.0117847	Downregulated
RAC1	HCM_Mild - HCM_Severe	-0.385657	0.00722335	0.0300254	Downregulated
RAC1	HCM_Normal - HCM_Severe	-0.342242	0.0129623	0.0471848	Downregulated
RAC1	HCM_Mild - HCM_Moderate	-0.41221	0.00231851	0.0127182	Downregulated
RAC1	HCM_Normal - HCM_Moderate	-0.368795	0.00426543	0.0199834	Downregulated
RAD21	CONTROL_Normal - CONTROL_Mild	-0.183063	0.00469653	0.0215392	Downregulated
RAD50	CONTROL_Mild - HCM_Severe	-0.348003	0.000943237	0.00655968	Downregulated
RAD50	CONTROL_Normal - HCM_Severe	-0.354582	0.00296493	0.0153267	Downregulated
RAD50	CONTROL_Mild - HCM_Moderate	-0.379372	0.000313874	0.00283857	Downregulated
RAD50	CONTROL_Normal - HCM_Moderate	-0.385951	0.00272555	0.0143363	Downregulated
RAD50	CONTROL_Mild - HCM_Mild	-0.311842	0.00266204	0.0140703	Downregulated
RAD50	CONTROL_Normal - HCM_Mild	-0.318421	0.00396414	0.0188976	Downregulated
RAD50	CONTROL_Mild - HCM_Normal	-0.283194	0.00429553	0.0200704	Downregulated
RAD50	CONTROL_Normal - HCM_Normal	-0.289773	0.00900084	0.0357078	Downregulated
RAD51C	CONTROL_Mild - HCM_Severe	-0.353339	0.000635468	0.00492743	Downregulated
RAD51C	CONTROL_Normal - HCM_Severe	-0.428981	0.000940688	0.00655243	Downregulated
RAD51C	HCM_Mild - HCM_Moderate	-0.18609	0.0136625	0.0490738	Downregulated
RAD51C	CONTROL_Mild - HCM_Moderate	-0.395973	0.00012899	0.00139927	Downregulated
RAD51C	CONTROL_Normal - HCM_Moderate	-0.471616	0.00109055	0.00729827	Downregulated
RAD51C	CONTROL_Normal - HCM_Mild	-0.285525	0.00491094	0.0223341	Downregulated
RAD51C	CONTROL_Mild - HCM_Normal	-0.297271	0.00248623	0.0133744	Downregulated
RAD51C	CONTROL_Normal - HCM_Normal	-0.372913	0.00313139	0.0158206	Downregulated
RASGRF2	CONTROL_Mild - HCM_Severe	-0.389678	0.000760005	0.00560451	Downregulated
RASGRF2	CONTROL_Normal - HCM_Severe	-0.372616	0.00233416	0.0127596	Downregulated
RASGRF2	CONTROL_Mild - HCM_Moderate	-0.498452	3.05528e-05	0.000433621	Downregulated
RASGRF2	CONTROL_Normal - HCM_Moderate	-0.481389	0.00104284	0.00707702	Downregulated
RASGRF2	CONTROL_Mild - HCM_Mild	-0.321302	0.00481308	0.0219695	Downregulated
RASGRF2	CONTROL_Normal - HCM_Mild	-0.30424	0.00533665	0.0237366	Downregulated
RASGRF2	CONTROL_Mild - HCM_Normal	-0.380157	0.000786829	0.00575245	Downregulated
RASGRF2	CONTROL_Normal - HCM_Normal	-0.363094	0.00395656	0.0188796	Downregulated
RB1	CONTROL_Normal - HCM_Moderate	-0.380019	0.00964052	0.0375436	Downregulated
RB1	CONTROL_Normal - HCM_Normal	-0.354607	0.0135975	0.0488836	Downregulated
RBL2	CONTROL_Normal - HCM_Severe	-0.272793	0.00128937	0.00823606	Downregulated
RBL2	CONTROL_Normal - HCM_Moderate	-0.233815	0.0022785	0.0125621	Downregulated
REPS1	CONTROL_Mild - HCM_Severe	-0.218561	0.0125251	0.0458427	Downregulated
REPS1	CONTROL_Normal - HCM_Severe	-0.330439	0.00279144	0.0145947	Downregulated
REPS1	CONTROL_Mild - HCM_Moderate	-0.289098	0.00169275	0.0100457	Downregulated
REPS1	CONTROL_Normal - HCM_Moderate	-0.400975	0.0014873	0.00914356	Downregulated
REPS1	CONTROL_Mild - HCM_Mild	-0.233615	0.00913011	0.0360173	Downregulated
REPS1	CONTROL_Normal - HCM_Mild	-0.345492	0.00188293	0.0108559	Downregulated
REPS1	CONTROL_Mild - HCM_Normal	-0.255832	0.00452619	0.0209568	Downregulated
REPS1	CONTROL_Normal - HCM_Normal	-0.36771	0.0023254	0.0127319	Downregulated
RICTOR	CONTROL_Mild - HCM_Severe	-0.203262	0.00853847	0.034185	Downregulated
RICTOR	CONTROL_Mild - HCM_Moderate	-0.204527	0.00754028	0.0309728	Downregulated
RICTOR	CONTROL_Mild - HCM_Mild	-0.258348	0.00219945	0.0122192	Downregulated
RICTOR	CONTROL_Normal - HCM_Mild	-0.25069	0.00684572	0.0288415	Downregulated
RICTOR	CONTROL_Mild - HCM_Normal	-0.24748	0.00300028	0.0154727	Downregulated
RICTOR	CONTROL_Normal - HCM_Normal	-0.239823	0.0105477	0.0402125	Downregulated
RNLS	CONTROL_Mild - HCM_Severe	-0.320058	0.0036905	0.0178971	Downregulated
RNLS	CONTROL_Normal - HCM_Severe	-0.34154	0.00349221	0.0171264	Downregulated
RNLS	CONTROL_Mild - HCM_Moderate	-0.361689	0.000964262	0.00668453	Downregulated
RNLS	CONTROL_Normal - HCM_Moderate	-0.383171	0.00260809	0.0138694	Downregulated
RNLS	CONTROL_Mild - HCM_Mild	-0.452325	0.000163099	0.00168123	Downregulated
RNLS	CONTROL_Normal - HCM_Mild	-0.473807	0.000457319	0.00379222	Downregulated
RNLS	CONTROL_Mild - HCM_Normal	-0.409707	0.000335859	0.00298434	Downregulated
RNLS	CONTROL_Normal - HCM_Normal	-0.431189	0.00179182	0.0104483	Downregulated
ROBO4	CONTROL_Mild - HCM_Severe	-0.371068	0.000319948	0.00287557	Downregulated
ROBO4	CONTROL_Normal - HCM_Severe	-0.357336	7.82849e-07	1.90536e-05	Downregulated
ROBO4	CONTROL_Mild - HCM_Moderate	-0.264497	0.00615609	0.026659	Downregulated
ROBO4	CONTROL_Normal - HCM_Moderate	-0.250764	6.95485e-05	0.000840378	Downregulated
ROBO4	CONTROL_Normal - HCM_Mild	-0.215994	0.00251384	0.0134994	Downregulated
ROBO4	CONTROL_Mild - HCM_Normal	-0.317063	0.00127901	0.00818793	Downregulated
ROBO4	CONTROL_Normal - HCM_Normal	-0.303331	3.90467e-06	7.65105e-05	Downregulated
ROCK1	CONTROL_Normal - HCM_Moderate	-0.143768	0.0122692	0.045153	Downregulated
RORA	HCM_Mild - HCM_Severe	-0.275255	0.00218978	0.0121872	Downregulated
RORA	HCM_Normal - HCM_Severe	-0.237247	0.00562496	0.0247703	Downregulated
RORA	CONTROL_Mild - HCM_Severe	-0.407459	0.000145817	0.0015377	Downregulated
RORA	CONTROL_Normal - HCM_Severe	-0.36287	0.00228209	0.0125659	Downregulated
RORA	HCM_Mild - HCM_Moderate	-0.23138	0.00428956	0.0200641	Downregulated
RORA	HCM_Normal - HCM_Moderate	-0.193372	0.0111715	0.0420746	Downregulated
RORA	CONTROL_Mild - HCM_Moderate	-0.363584	0.000337973	0.00299122	Downregulated
RORA	CONTROL_Normal - HCM_Moderate	-0.318995	0.004989	0.0226064	Downregulated
RUNX1T1	CONTROL_Mild - HCM_Severe	-0.393423	0.00130335	0.00830099	Downregulated
RUNX1T1	CONTROL_Normal - HCM_Severe	-0.281719	0.0133194	0.0482024	Downregulated
RUNX1T1	CONTROL_Mild - HCM_Moderate	-0.377368	0.00143416	0.00894437	Downregulated
SERPINH1	CONTROL_Normal - HCM_Severe	-0.29653	0.00484991	0.0221144	Downregulated
SETD2	HCM_Mild - HCM_Moderate	-0.275408	0.0087071	0.0347007	Downregulated
SETD2	HCM_Normal - HCM_Moderate	-0.286596	0.0062112	0.0267777	Downregulated
SFRP1	HCM_Moderate - HCM_Severe	0.204335	0.00783297	0.0318729	Upregulated
SHC1	HCM_Normal - HCM_Severe	-0.135897	0.00435835	0.0202877	Downregulated
SHC1	CONTROL_Mild - HCM_Severe	-0.351792	1.0834e-05	0.000183794	Downregulated
SHC1	CONTROL_Normal - HCM_Severe	-0.235643	9.26149e-06	0.000162778	Downregulated
SHC1	HCM_Normal - HCM_Moderate	-0.106693	0.0119034	0.0442372	Downregulated
SHC1	CONTROL_Mild - HCM_Moderate	-0.322588	2.34408e-05	0.000348012	Downregulated
SHC1	CONTROL_Normal - HCM_Moderate	-0.206438	1.71034e-05	0.000268107	Downregulated
SHC1	CONTROL_Mild - HCM_Mild	-0.223588	0.00413819	0.0195346	Downregulated
SHC1	CONTROL_Mild - HCM_Normal	-0.215895	0.00327734	0.0163304	Downregulated
SIN3A	CONTROL_Mild - HCM_Severe	-0.41846	5.15954e-05	0.000658182	Downregulated
SIN3A	CONTROL_Normal - HCM_Severe	-0.431109	7.52581e-09	3.42799e-07	Downregulated
SIN3A	CONTROL_Mild - HCM_Moderate	-0.416217	3.03612e-05	0.000432264	Downregulated
SIN3A	CONTROL_Normal - HCM_Moderate	-0.428866	6.54612e-10	4.35072e-08	Downregulated
SIN3A	CONTROL_Mild - HCM_Mild	-0.318871	0.00194786	0.0111416	Downregulated
SIN3A	CONTROL_Normal - HCM_Mild	-0.33152	7.96314e-06	0.000143139	Downregulated
SIN3A	CONTROL_Mild - HCM_Normal	-0.328634	0.00075283	0.00557415	Downregulated
SIN3A	CONTROL_Normal - HCM_Normal	-0.341283	2.78522e-07	7.84187e-06	Downregulated
SMAD3	CONTROL_Mild - HCM_Severe	-0.451881	0.0011722	0.00772	Downregulated
SMAD3	CONTROL_Normal - HCM_Severe	-0.50787	0.0020643	0.0116847	Downregulated
SMAD3	CONTROL_Mild - HCM_Moderate	-0.474235	0.000651159	0.00501335	Downregulated
SMAD3	CONTROL_Normal - HCM_Moderate	-0.530225	0.00208484	0.0117627	Downregulated
SMAD3	CONTROL_Normal - HCM_Mild	-0.361584	0.00849365	0.0340372	Downregulated
SMAD4	HCM_Mild - HCM_Severe	-0.260913	0.00622849	0.0268276	Downregulated
SMAD4	HCM_Normal - HCM_Severe	-0.262017	0.00521395	0.0233821	Downregulated
SMAD4	HCM_Mild - HCM_Moderate	-0.220597	0.0111599	0.042049	Downregulated
SMAD4	HCM_Normal - HCM_Moderate	-0.221702	0.00909096	0.035967	Downregulated
SMAD5	HCM_Mild - HCM_Severe	-0.272779	0.00303748	0.0155814	Downregulated
SMAD5	HCM_Normal - HCM_Severe	-0.264685	0.00348798	0.0171153	Downregulated
SMAD5	HCM_Mild - HCM_Moderate	-0.277968	0.00174847	0.0102725	Downregulated
SMAD5	HCM_Normal - HCM_Moderate	-0.269874	0.00218808	0.0121871	Downregulated
SMAP1	CONTROL_Mild - HCM_Severe	-0.406178	0.000844305	0.00605062	Downregulated
SMAP1	CONTROL_Normal - HCM_Severe	-0.376499	0.00864259	0.0345227	Downregulated
SMAP1	CONTROL_Mild - HCM_Moderate	-0.381546	0.00108971	0.00729827	Downregulated
SMARCA4	HCM_Mild - HCM_Severe	-0.226748	0.00638983	0.0273985	Downregulated
SMARCA4	HCM_Normal - HCM_Severe	-0.214034	0.00978243	0.0379303	Downregulated
SMARCA4	CONTROL_Mild - HCM_Severe	-0.314416	0.0012091	0.00786185	Downregulated
SMARCA4	CONTROL_Normal - HCM_Severe	-0.265366	0.0103234	0.0395305	Downregulated
SMARCA4	HCM_Mild - HCM_Moderate	-0.26134	0.0020839	0.0117627	Downregulated
SMARCA4	HCM_Normal - HCM_Moderate	-0.248625	0.00434319	0.0202604	Downregulated
SMARCA4	CONTROL_Mild - HCM_Moderate	-0.349008	0.000334768	0.00298372	Downregulated
SMARCA4	CONTROL_Normal - HCM_Moderate	-0.299958	0.00897699	0.0356295	Downregulated
SOCS2	HCM_Mild - HCM_Severe	-0.287576	0.00813203	0.0328911	Downregulated
SOCS2	HCM_Normal - HCM_Severe	-0.267449	0.0103671	0.0396455	Downregulated
SOCS2	CONTROL_Normal - HCM_Severe	-0.343247	0.0134755	0.0486055	Downregulated
SOCS2	HCM_Mild - HCM_Moderate	-0.250384	0.0120874	0.0446729	Downregulated
SOS1	HCM_Mild - HCM_Severe	-0.228734	0.00100751	0.00690509	Downregulated
SOS1	HCM_Normal - HCM_Severe	-0.221011	0.000314667	0.00284279	Downregulated
SOS1	CONTROL_Mild - HCM_Severe	-0.282483	0.00312442	0.0157946	Downregulated
SOS1	CONTROL_Normal - HCM_Severe	-0.261495	6.7741e-05	0.000820818	Downregulated
SOS1	HCM_Mild - HCM_Moderate	-0.213105	0.000911361	0.00638907	Downregulated
SOS1	HCM_Normal - HCM_Moderate	-0.205382	0.000202606	0.00200532	Downregulated
SOS1	CONTROL_Mild - HCM_Moderate	-0.266854	0.00362137	0.0176603	Downregulated
SOS1	CONTROL_Normal - HCM_Moderate	-0.245866	4.06065e-05	0.00054518	Downregulated
SP1	CONTROL_Mild - HCM_Severe	-0.329504	0.00342922	0.0168873	Downregulated
SP1	HCM_Normal - HCM_Moderate	-0.209376	0.012544	0.0458926	Downregulated
SP1	CONTROL_Mild - HCM_Moderate	-0.336181	0.0022906	0.0126048	Downregulated
SPOP	HCM_Mild - HCM_Severe	-0.167392	0.00758952	0.031131	Downregulated
SPOP	HCM_Normal - HCM_Severe	-0.156189	0.00449273	0.0208352	Downregulated
SPOP	CONTROL_Normal - HCM_Severe	-0.219524	0.000227147	0.00217162	Downregulated
SPOP	HCM_Mild - HCM_Moderate	-0.17821	0.00230014	0.0126493	Downregulated
SPOP	HCM_Normal - HCM_Moderate	-0.167007	0.000848324	0.00606678	Downregulated
SPOP	CONTROL_Mild - HCM_Moderate	-0.209704	0.0118105	0.0439485	Downregulated
SPOP	CONTROL_Normal - HCM_Moderate	-0.230342	2.92094e-05	0.000419342	Downregulated
SPRY2	HCM_Mild - HCM_Severe	-0.451888	0.000457682	0.00379222	Downregulated
SPRY2	HCM_Normal - HCM_Severe	-0.480824	0.000365808	0.00317301	Downregulated
SPRY2	HCM_Mild - HCM_Moderate	-0.36752	0.00127505	0.00817459	Downregulated
SPRY2	HCM_Normal - HCM_Moderate	-0.396457	0.000916902	0.00641758	Downregulated
SREBF1	CONTROL_Mild - HCM_Severe	-0.469044	0.0001379	0.00147494	Downregulated
SREBF1	CONTROL_Normal - HCM_Severe	-0.393752	0.00240276	0.0130243	Downregulated
SREBF1	CONTROL_Mild - HCM_Moderate	-0.511012	3.52262e-05	0.000482626	Downregulated
SREBF1	CONTROL_Normal - HCM_Moderate	-0.43572	0.00203252	0.0115273	Downregulated
SREBF1	CONTROL_Mild - HCM_Mild	-0.4357	0.000351729	0.00308472	Downregulated
SREBF1	CONTROL_Normal - HCM_Mild	-0.360408	0.00301642	0.0155008	Downregulated
SREBF1	CONTROL_Mild - HCM_Normal	-0.399052	0.000620961	0.00485824	Downregulated
SREBF1	CONTROL_Normal - HCM_Normal	-0.32376	0.00758322	0.031131	Downregulated
SRP54	CONTROL_Mild - HCM_Severe	-0.346569	0.00022624	0.00216533	Downregulated
SRP54	CONTROL_Normal - HCM_Severe	-0.233715	0.00805093	0.0326089	Downregulated
SRP54	CONTROL_Mild - HCM_Moderate	-0.272094	0.00165013	0.00986675	Downregulated
SRP54	CONTROL_Mild - HCM_Mild	-0.235996	0.00739406	0.0305743	Downregulated
SRP54	CONTROL_Mild - HCM_Normal	-0.220672	0.00880793	0.0350064	Downregulated
ST6GAL1	CONTROL_Normal - HCM_Severe	-0.341774	0.0106685	0.0406198	Downregulated
STAG2	HCM_Mild - HCM_Severe	-0.186921	0.00268294	0.0141623	Downregulated
STAG2	HCM_Normal - HCM_Severe	-0.178132	0.00324153	0.0161797	Downregulated
STAG2	CONTROL_Mild - HCM_Severe	-0.245506	0.00149543	0.00916854	Downregulated
STAG2	CONTROL_Normal - HCM_Severe	-0.307533	0.000421336	0.00356925	Downregulated
STAG2	HCM_Mild - HCM_Moderate	-0.160158	0.0048704	0.0221962	Downregulated
STAG2	HCM_Normal - HCM_Moderate	-0.151369	0.00551423	0.024377	Downregulated
STAG2	CONTROL_Mild - HCM_Moderate	-0.218743	0.00295787	0.015316	Downregulated
STAG2	CONTROL_Normal - HCM_Moderate	-0.28077	0.00115156	0.00762298	Downregulated
STAT6	HCM_Normal - HCM_Severe	-0.28541	0.0109797	0.0414057	Downregulated
STK11	CONTROL_Mild - HCM_Severe	-0.223527	0.00482485	0.0220116	Downregulated
STK11	CONTROL_Normal - HCM_Severe	-0.227207	0.00417375	0.0196491	Downregulated
STK11	CONTROL_Mild - HCM_Mild	-0.268643	0.00120828	0.00786185	Downregulated
STK11	CONTROL_Normal - HCM_Mild	-0.272322	0.00123075	0.00795313	Downregulated
STK11	CONTROL_Mild - HCM_Normal	-0.215005	0.00524492	0.0234485	Downregulated
STK11	CONTROL_Normal - HCM_Normal	-0.218685	0.0073227	0.0303559	Downregulated
TANK	CONTROL_Mild - HCM_Severe	-0.358224	0.00996808	0.038417	Downregulated
TANK	CONTROL_Mild - HCM_Moderate	-0.357736	0.00866802	0.0345925	Downregulated
TAP1	CONTROL_Mild - HCM_Severe	-0.326566	0.000507751	0.00413617	Downregulated
TAP1	CONTROL_Normal - HCM_Severe	-0.396852	0.00121036	0.00786416	Downregulated
TAP1	CONTROL_Mild - HCM_Moderate	-0.320702	0.000430137	0.00362615	Downregulated
TAP1	CONTROL_Normal - HCM_Moderate	-0.390988	0.00216349	0.0120656	Downregulated
TAP1	CONTROL_Mild - HCM_Mild	-0.354567	0.00025526	0.00239564	Downregulated
TAP1	CONTROL_Normal - HCM_Mild	-0.424853	0.000532975	0.00427757	Downregulated
TAP1	CONTROL_Mild - HCM_Normal	-0.358304	0.00016654	0.00171062	Downregulated
TAP1	CONTROL_Normal - HCM_Normal	-0.428589	0.00179326	0.0104497	Downregulated
TAP2	CONTROL_Mild - HCM_Severe	-0.407127	5.23917e-05	0.000665413	Downregulated
TAP2	CONTROL_Normal - HCM_Severe	-0.39216	4.08431e-08	1.54494e-06	Downregulated
TAP2	CONTROL_Mild - HCM_Moderate	-0.393021	4.87882e-05	0.000630695	Downregulated
TAP2	CONTROL_Normal - HCM_Moderate	-0.378054	9.46016e-09	4.24244e-07	Downregulated
TAP2	CONTROL_Mild - HCM_Mild	-0.485608	4.51638e-06	8.67383e-05	Downregulated
TAP2	CONTROL_Normal - HCM_Mild	-0.470641	1.87514e-09	1.04575e-07	Downregulated
TAP2	CONTROL_Mild - HCM_Normal	-0.468074	2.82275e-06	5.71114e-05	Downregulated
TAP2	CONTROL_Normal - HCM_Normal	-0.453107	9.48118e-11	9.59143e-09	Downregulated
TAPBPL	CONTROL_Mild - HCM_Severe	-0.46883	0.000592092	0.0046533	Downregulated
TAPBPL	CONTROL_Normal - HCM_Severe	-0.358299	0.00620845	0.0267777	Downregulated
TAPBPL	CONTROL_Mild - HCM_Moderate	-0.491561	0.000264916	0.00247824	Downregulated
TAPBPL	CONTROL_Normal - HCM_Moderate	-0.38103	0.0051707	0.0232481	Downregulated
TAPBPL	CONTROL_Mild - HCM_Mild	-0.467753	0.000700101	0.00528722	Downregulated
TAPBPL	CONTROL_Normal - HCM_Mild	-0.357222	0.00576603	0.02531	Downregulated
TAPBPL	CONTROL_Mild - HCM_Normal	-0.513245	0.000205946	0.00202684	Downregulated
TAPBPL	CONTROL_Normal - HCM_Normal	-0.402714	0.00454926	0.0210189	Downregulated
TBK1	CONTROL_Mild - HCM_Severe	-0.273434	0.0010749	0.00723807	Downregulated
TBK1	CONTROL_Normal - HCM_Severe	-0.347023	0.000425935	0.00360069	Downregulated
TBK1	CONTROL_Mild - HCM_Moderate	-0.290354	0.000384521	0.00331221	Downregulated
TBK1	CONTROL_Normal - HCM_Moderate	-0.363942	0.000670841	0.00511509	Downregulated
TBK1	CONTROL_Mild - HCM_Mild	-0.375762	3.19669e-05	0.000448568	Downregulated
TBK1	CONTROL_Normal - HCM_Mild	-0.44935	4.2523e-05	0.000563948	Downregulated
TBK1	CONTROL_Mild - HCM_Normal	-0.362874	2.82662e-05	0.00040782	Downregulated
TBK1	CONTROL_Normal - HCM_Normal	-0.436463	0.000374773	0.00323786	Downregulated
TBP	CONTROL_Mild - HCM_Severe	-0.327944	0.000211276	0.00206618	Downregulated
TBP	CONTROL_Normal - HCM_Severe	-0.425731	2.13103e-10	1.79999e-08	Downregulated
TBP	CONTROL_Mild - HCM_Moderate	-0.367976	2.23685e-05	0.000336688	Downregulated
TBP	CONTROL_Normal - HCM_Moderate	-0.465762	5.91645e-13	1.31982e-10	Downregulated
TBP	CONTROL_Mild - HCM_Mild	-0.275832	0.00199638	0.0113519	Downregulated
TBP	CONTROL_Normal - HCM_Mild	-0.373618	3.53516e-08	1.35488e-06	Downregulated
TBP	CONTROL_Mild - HCM_Normal	-0.271884	0.00124405	0.00800532	Downregulated
TBP	CONTROL_Normal - HCM_Normal	-0.36967	1.17484e-09	7.19793e-08	Downregulated
TBXAS1	CONTROL_Mild - HCM_Severe	-0.580839	1.78667e-07	5.45404e-06	Downregulated
TBXAS1	CONTROL_Normal - HCM_Severe	-0.514772	9.62393e-11	9.62393e-09	Downregulated
TBXAS1	CONTROL_Mild - HCM_Moderate	-0.583898	6.36945e-08	2.30892e-06	Downregulated
TBXAS1	CONTROL_Normal - HCM_Moderate	-0.517831	3.9734e-12	6.52237e-10	Downregulated
TBXAS1	CONTROL_Mild - HCM_Mild	-0.618464	8.13947e-08	2.82125e-06	Downregulated
TBXAS1	CONTROL_Normal - HCM_Mild	-0.552397	7.3408e-11	7.69457e-09	Downregulated
TBXAS1	CONTROL_Mild - HCM_Normal	-0.606217	3.00369e-08	1.18129e-06	Downregulated
TBXAS1	CONTROL_Normal - HCM_Normal	-0.54015	1.61361e-12	2.92466e-10	Downregulated
TCF3	CONTROL_Mild - HCM_Severe	-0.5174	0.00602769	0.0261943	Downregulated
TCF3	CONTROL_Mild - HCM_Moderate	-0.442286	0.0112365	0.0422676	Downregulated
TCF7L1	CONTROL_Mild - HCM_Severe	-0.446736	9.01069e-08	3.05031e-06	Downregulated
TCF7L1	CONTROL_Normal - HCM_Severe	-0.427261	3.41699e-12	5.71688e-10	Downregulated
TCF7L1	CONTROL_Mild - HCM_Moderate	-0.365917	2.54539e-06	5.21056e-05	Downregulated
TCF7L1	CONTROL_Normal - HCM_Moderate	-0.346442	1.19469e-10	1.16785e-08	Downregulated
TCF7L1	CONTROL_Mild - HCM_Mild	-0.437492	2.69037e-07	7.59941e-06	Downregulated
TCF7L1	CONTROL_Normal - HCM_Mild	-0.418018	4.78908e-11	5.55534e-09	Downregulated
TCF7L1	CONTROL_Mild - HCM_Normal	-0.442408	5.10686e-08	1.89373e-06	Downregulated
TCF7L1	CONTROL_Normal - HCM_Normal	-0.422933	3.14025e-13	7.58893e-11	Downregulated
TCL1B	CONTROL_Mild - HCM_Severe	-0.631271	8.51464e-07	2.04634e-05	Downregulated
TCL1B	CONTROL_Normal - HCM_Severe	-0.544342	1.7168e-09	9.76221e-08	Downregulated
TCL1B	CONTROL_Mild - HCM_Moderate	-0.608966	7.84043e-07	1.90536e-05	Downregulated
TCL1B	CONTROL_Normal - HCM_Moderate	-0.522037	3.78779e-10	2.89068e-08	Downregulated
TCL1B	CONTROL_Mild - HCM_Mild	-0.612834	2.63964e-06	5.3782e-05	Downregulated
TCL1B	CONTROL_Normal - HCM_Mild	-0.525905	2.06372e-08	8.42928e-07	Downregulated
TCL1B	CONTROL_Mild - HCM_Normal	-0.55454	5.30424e-06	9.94546e-05	Downregulated
TCL1B	CONTROL_Normal - HCM_Normal	-0.467611	1.10299e-08	4.92102e-07	Downregulated
TET2	CONTROL_Mild - HCM_Severe	-0.344779	0.0101049	0.0388308	Downregulated
TET2	CONTROL_Mild - HCM_Moderate	-0.374455	0.00506591	0.0229072	Downregulated
TET2	CONTROL_Mild - HCM_Mild	-0.352712	0.00948292	0.037046	Downregulated
TET2	CONTROL_Mild - HCM_Normal	-0.373821	0.0057434	0.0252234	Downregulated
TFDP1	CONTROL_Mild - HCM_Severe	-0.332992	0.0121734	0.0449145	Downregulated
TFDP1	CONTROL_Mild - HCM_Moderate	-0.388492	0.00498591	0.0226042	Downregulated
TFE3	CONTROL_Mild - HCM_Severe	-0.461392	0.000219131	0.00212214	Downregulated
TFE3	CONTROL_Normal - HCM_Severe	-0.448461	0.00135167	0.00855239	Downregulated
TFE3	CONTROL_Mild - HCM_Moderate	-0.451954	0.000182708	0.00184403	Downregulated
TFE3	CONTROL_Normal - HCM_Moderate	-0.439024	0.00234601	0.0127964	Downregulated
TFE3	CONTROL_Mild - HCM_Mild	-0.508218	8.63234e-05	0.00100269	Downregulated
TFE3	CONTROL_Normal - HCM_Mild	-0.495287	0.000515113	0.00417659	Downregulated
TFE3	CONTROL_Mild - HCM_Normal	-0.550651	1.93365e-05	0.000296175	Downregulated
TFE3	CONTROL_Normal - HCM_Normal	-0.537721	0.00123088	0.00795313	Downregulated
TGFB1	HCM_Normal - HCM_Severe	-0.200538	0.011917	0.0442502	Downregulated
TGFB1	CONTROL_Mild - HCM_Severe	-0.482681	2.85237e-05	0.000410854	Downregulated
TGFB1	CONTROL_Normal - HCM_Severe	-0.54238	0.000173566	0.00177117	Downregulated
TGFB1	CONTROL_Mild - HCM_Moderate	-0.333165	0.0013675	0.00863998	Downregulated
TGFB1	CONTROL_Normal - HCM_Moderate	-0.392865	0.00166347	0.00991246	Downregulated
TGFB1	CONTROL_Mild - HCM_Mild	-0.284785	0.00823953	0.0332486	Downregulated
TGFB1	CONTROL_Normal - HCM_Mild	-0.344484	0.00144301	0.00896351	Downregulated
TGFB1	CONTROL_Mild - HCM_Normal	-0.282143	0.00599962	0.0261114	Downregulated
TGFB1	CONTROL_Normal - HCM_Normal	-0.341843	0.00349568	0.0171338	Downregulated
TGFB2	HCM_Mild - HCM_Severe	0.447738	2.6038e-08	1.03913e-06	Upregulated
TGFB2	HCM_Normal - HCM_Severe	0.436393	1.50521e-09	8.69543e-08	Upregulated
TGFB2	CONTROL_Mild - HCM_Severe	-0.320749	0.00147132	0.00908479	Downregulated
TGFB2	CONTROL_Normal - HCM_Severe	-0.282445	4.34115e-05	0.000573644	Downregulated
TGFB2	HCM_Mild - HCM_Moderate	0.389198	1.06991e-07	3.55274e-06	Upregulated
TGFB2	HCM_Normal - HCM_Moderate	0.377853	3.94865e-09	2.00896e-07	Upregulated
TGFB2	CONTROL_Mild - HCM_Moderate	-0.379289	0.000127928	0.00139122	Downregulated
TGFB2	CONTROL_Normal - HCM_Moderate	-0.340986	2.30317e-07	6.7924e-06	Downregulated
TGFB2	CONTROL_Mild - HCM_Mild	-0.768487	1.84079e-10	1.60149e-08	Downregulated
TGFB2	CONTROL_Normal - HCM_Mild	-0.730183	3.30152e-15	1.7952e-12	Downregulated
TGFB2	CONTROL_Mild - HCM_Normal	-0.757142	4.46291e-11	5.32503e-09	Downregulated
TGFB2	CONTROL_Normal - HCM_Normal	-0.718839	2.30068e-17	2.16317e-14	Downregulated
TGFB3	CONTROL_Mild - HCM_Severe	-0.403185	3.48202e-05	0.000479329	Downregulated
TGFB3	CONTROL_Normal - HCM_Severe	-0.344063	3.44813e-07	9.34539e-06	Downregulated
TGFB3	HCM_Normal - HCM_Moderate	-0.147036	0.00518599	0.0232928	Downregulated
TGFB3	CONTROL_Mild - HCM_Moderate	-0.442768	3.60196e-06	7.1059e-05	Downregulated
TGFB3	CONTROL_Normal - HCM_Moderate	-0.383646	2.47514e-09	1.32873e-07	Downregulated
TGFB3	CONTROL_Mild - HCM_Mild	-0.366036	0.000204667	0.00202285	Downregulated
TGFB3	CONTROL_Normal - HCM_Mild	-0.306914	1.01628e-05	0.000175081	Downregulated
TGFB3	CONTROL_Mild - HCM_Normal	-0.295732	0.00118529	0.00776507	Downregulated
TGFB3	CONTROL_Normal - HCM_Normal	-0.23661	6.55581e-05	0.000802188	Downregulated
TGFBR1	CONTROL_Mild - HCM_Severe	-0.3246	0.000614361	0.00481526	Downregulated
TGFBR1	CONTROL_Normal - HCM_Severe	-0.412093	0.000289957	0.002661	Downregulated
TGFBR1	CONTROL_Mild - HCM_Moderate	-0.263679	0.00300246	0.0154748	Downregulated
TGFBR1	CONTROL_Normal - HCM_Moderate	-0.351173	0.00115866	0.00764824	Downregulated
TGFBR1	CONTROL_Normal - HCM_Mild	-0.291064	0.0015574	0.00946184	Downregulated
TGFBR1	CONTROL_Normal - HCM_Normal	-0.300052	0.00275442	0.0144445	Downregulated
THBS4	HCM_Mild - HCM_Severe	-0.557473	0.0069524	0.0291853	Downregulated
THBS4	HCM_Normal - HCM_Severe	-0.821828	1.57073e-05	0.00025074	Downregulated
THBS4	CONTROL_Normal - HCM_Severe	0.566674	0.00309473	0.0157175	Upregulated
THBS4	HCM_Mild - HCM_Moderate	-0.530622	0.00547047	0.0242327	Downregulated
THBS4	HCM_Normal - HCM_Moderate	-0.794978	4.25884e-06	8.27052e-05	Downregulated
THBS4	CONTROL_Normal - HCM_Moderate	0.593525	0.000755025	0.00558565	Upregulated
THBS4	CONTROL_Mild - HCM_Mild	1.15259	0.000155412	0.0016154	Upregulated
THBS4	CONTROL_Normal - HCM_Mild	1.12415	3.73225e-07	9.89252e-06	Upregulated
THBS4	CONTROL_Mild - HCM_Normal	1.41694	1.99957e-06	4.27427e-05	Upregulated
THBS4	CONTROL_Normal - HCM_Normal	1.3885	3.7772e-11	4.69452e-09	Upregulated
THEM4	CONTROL_Mild - HCM_Severe	-0.415807	0.00013817	0.00147494	Downregulated
THEM4	CONTROL_Normal - HCM_Severe	-0.330922	0.00472376	0.0216299	Downregulated
THEM4	CONTROL_Mild - HCM_Moderate	-0.368239	0.00034167	0.0030178	Downregulated
THEM4	CONTROL_Normal - HCM_Moderate	-0.283354	0.0103717	0.0396458	Downregulated
THEM4	CONTROL_Mild - HCM_Mild	-0.398486	0.000235365	0.00224034	Downregulated
THEM4	CONTROL_Normal - HCM_Mild	-0.313601	0.00471319	0.0216042	Downregulated
THEM4	CONTROL_Mild - HCM_Normal	-0.36943	0.000406515	0.00347074	Downregulated
THEM4	CONTROL_Normal - HCM_Normal	-0.284545	0.0112175	0.0422294	Downregulated
THY1	CONTROL_Mild - HCM_Severe	-0.570918	9.17215e-05	0.00105135	Downregulated
THY1	CONTROL_Normal - HCM_Severe	-0.522359	0.00173068	0.010215	Downregulated
THY1	CONTROL_Mild - HCM_Moderate	-0.558555	8.16089e-05	0.000955582	Downregulated
THY1	CONTROL_Normal - HCM_Moderate	-0.509996	0.00276065	0.0144685	Downregulated
THY1	CONTROL_Mild - HCM_Mild	-0.633913	3.00297e-05	0.000429702	Downregulated
THY1	CONTROL_Normal - HCM_Mild	-0.585353	0.000680039	0.00516711	Downregulated
THY1	CONTROL_Mild - HCM_Normal	-0.656793	1.57806e-05	0.000251071	Downregulated
THY1	CONTROL_Normal - HCM_Normal	-0.608234	0.00159413	0.00961784	Downregulated
TICAM1	CONTROL_Mild - HCM_Severe	-0.600752	1.47484e-09	8.69543e-08	Downregulated
TICAM1	CONTROL_Normal - HCM_Severe	-0.527377	2.47028e-13	6.71607e-11	Downregulated
TICAM1	CONTROL_Mild - HCM_Moderate	-0.603217	4.29835e-10	3.19621e-08	Downregulated
TICAM1	CONTROL_Normal - HCM_Moderate	-0.529842	6.59321e-15	2.86805e-12	Downregulated
TICAM1	CONTROL_Mild - HCM_Mild	-0.570251	1.21093e-08	5.34774e-07	Downregulated
TICAM1	CONTROL_Normal - HCM_Mild	-0.496877	1.37728e-11	1.96432e-09	Downregulated
TICAM1	CONTROL_Mild - HCM_Normal	-0.613084	3.19812e-10	2.50664e-08	Downregulated
TICAM1	CONTROL_Normal - HCM_Normal	-0.539709	5.77247e-15	2.64318e-12	Downregulated
TIE1	CONTROL_Mild - HCM_Severe	-0.291021	0.00317765	0.0159531	Downregulated
TIE1	CONTROL_Normal - HCM_Severe	-0.263737	9.43675e-05	0.0010704	Downregulated
TIE1	CONTROL_Mild - HCM_Moderate	-0.260268	0.00577977	0.0253448	Downregulated
TIE1	CONTROL_Normal - HCM_Moderate	-0.232984	0.000138979	0.00147994	Downregulated
TIE1	CONTROL_Normal - HCM_Mild	-0.211389	0.00245406	0.0132528	Downregulated
TIE1	CONTROL_Mild - HCM_Normal	-0.298497	0.00183348	0.0106059	Downregulated
TIE1	CONTROL_Normal - HCM_Normal	-0.271213	1.79589e-05	0.000279004	Downregulated
TIRAP	CONTROL_Mild - HCM_Severe	-0.511375	3.08457e-05	0.000436353	Downregulated
TIRAP	CONTROL_Normal - HCM_Severe	-0.528771	0.000496359	0.00405477	Downregulated
TIRAP	CONTROL_Mild - HCM_Moderate	-0.494244	3.02632e-05	0.000431623	Downregulated
TIRAP	CONTROL_Normal - HCM_Moderate	-0.51164	0.00109498	0.0073148	Downregulated
TIRAP	CONTROL_Mild - HCM_Mild	-0.640385	1.3902e-06	3.09329e-05	Downregulated
TIRAP	CONTROL_Normal - HCM_Mild	-0.657781	7.59639e-05	0.000893969	Downregulated
TIRAP	CONTROL_Mild - HCM_Normal	-0.560899	7.02841e-06	0.000127656	Downregulated
TIRAP	CONTROL_Normal - HCM_Normal	-0.578295	0.000800477	0.005818	Downregulated
TLR2	CONTROL_Mild - HCM_Severe	-0.532191	9.6235e-05	0.00108874	Downregulated
TLR2	CONTROL_Normal - HCM_Severe	-0.532461	0.00148812	0.00914356	Downregulated
TLR2	CONTROL_Mild - HCM_Moderate	-0.584948	2.01451e-05	0.000307478	Downregulated
TLR2	CONTROL_Normal - HCM_Moderate	-0.585218	0.00179037	0.0104473	Downregulated
TLR2	CONTROL_Mild - HCM_Mild	-0.644077	1.00392e-05	0.000174651	Downregulated
TLR2	CONTROL_Normal - HCM_Mild	-0.644346	0.000355764	0.00310531	Downregulated
TLR2	CONTROL_Mild - HCM_Normal	-0.627904	1.09602e-05	0.000185153	Downregulated
TLR2	CONTROL_Normal - HCM_Normal	-0.628173	0.00161816	0.0097168	Downregulated
TLR4	CONTROL_Mild - HCM_Severe	-0.392038	0.00127847	0.00818793	Downregulated
TLR4	CONTROL_Normal - HCM_Severe	-0.397973	0.00467189	0.0214601	Downregulated
TLR4	CONTROL_Mild - HCM_Moderate	-0.485969	0.000139316	0.00148172	Downregulated
TLR4	CONTROL_Normal - HCM_Moderate	-0.491905	0.00279734	0.0146167	Downregulated
TLR4	CONTROL_Mild - HCM_Mild	-0.578826	3.04075e-05	0.000432264	Downregulated
TLR4	CONTROL_Normal - HCM_Mild	-0.584762	0.000621856	0.00486087	Downregulated
TLR4	CONTROL_Mild - HCM_Normal	-0.558849	4.38343e-05	0.000577815	Downregulated
TLR4	CONTROL_Normal - HCM_Normal	-0.564784	0.0018951	0.0109043	Downregulated
TLR5	CONTROL_Mild - HCM_Severe	-0.571293	4.09274e-05	0.000546956	Downregulated
TLR5	CONTROL_Normal - HCM_Severe	-0.543494	0.00117536	0.00772356	Downregulated
TLR5	CONTROL_Mild - HCM_Moderate	-0.515393	9.3042e-05	0.00105951	Downregulated
TLR5	CONTROL_Normal - HCM_Moderate	-0.487595	0.00281404	0.0146951	Downregulated
TLR5	CONTROL_Mild - HCM_Mild	-0.507999	0.00017986	0.00182164	Downregulated
TLR5	CONTROL_Normal - HCM_Mild	-0.4802	0.00144343	0.00896351	Downregulated
TLR5	CONTROL_Mild - HCM_Normal	-0.546854	6.12138e-05	0.000756477	Downregulated
TLR5	CONTROL_Normal - HCM_Normal	-0.519056	0.00253305	0.0135657	Downregulated
TLR6	CONTROL_Mild - HCM_Severe	-0.614308	2.49616e-05	0.000368703	Downregulated
TLR6	CONTROL_Normal - HCM_Severe	-0.572777	0.00130685	0.00831717	Downregulated
TLR6	CONTROL_Mild - HCM_Moderate	-0.605116	2.17974e-05	0.000330955	Downregulated
TLR6	CONTROL_Normal - HCM_Moderate	-0.563585	0.00214031	0.0119517	Downregulated
TLR6	CONTROL_Mild - HCM_Mild	-0.580299	5.02489e-05	0.000645451	Downregulated
TLR6	CONTROL_Normal - HCM_Mild	-0.538768	0.00116782	0.00770284	Downregulated
TLR6	CONTROL_Mild - HCM_Normal	-0.608391	2.79611e-05	0.000404089	Downregulated
TLR6	CONTROL_Normal - HCM_Normal	-0.56686	0.00234962	0.0128081	Downregulated
TLR7	HCM_Mild - HCM_Severe	0.231867	0.00407426	0.0193166	Upregulated
TLR7	HCM_Normal - HCM_Severe	0.235182	0.000977929	0.00676849	Upregulated
TLR7	CONTROL_Mild - HCM_Severe	-0.479969	3.92781e-05	0.000528978	Downregulated
TLR7	CONTROL_Normal - HCM_Severe	-0.469099	1.80404e-08	7.58218e-07	Downregulated
TLR7	HCM_Mild - HCM_Moderate	0.193283	0.00900999	0.0357279	Upregulated
TLR7	HCM_Normal - HCM_Moderate	0.196598	0.0020029	0.0113816	Upregulated
TLR7	CONTROL_Mild - HCM_Moderate	-0.518553	5.59393e-06	0.000104212	Downregulated
TLR7	CONTROL_Normal - HCM_Moderate	-0.507683	1.56774e-10	1.40612e-08	Downregulated
TLR7	CONTROL_Mild - HCM_Mild	-0.711836	3.00703e-08	1.18129e-06	Downregulated
TLR7	CONTROL_Normal - HCM_Mild	-0.700966	8.375e-13	1.73482e-10	Downregulated
TLR7	CONTROL_Mild - HCM_Normal	-0.715151	5.62391e-09	2.71822e-07	Downregulated
TLR7	CONTROL_Normal - HCM_Normal	-0.704281	4.35203e-15	2.10348e-12	Downregulated
TLR8	CONTROL_Mild - HCM_Severe	-0.539147	4.14409e-05	0.000552969	Downregulated
TLR8	CONTROL_Normal - HCM_Severe	-0.53405	0.000425623	0.00360069	Downregulated
TLR8	CONTROL_Mild - HCM_Moderate	-0.533623	2.9136e-05	0.00041898	Downregulated
TLR8	CONTROL_Normal - HCM_Moderate	-0.528526	0.000812125	0.0058635	Downregulated
TLR8	CONTROL_Mild - HCM_Mild	-0.516381	9.25357e-05	0.0010579	Downregulated
TLR8	CONTROL_Normal - HCM_Mild	-0.511284	0.00033519	0.00298372	Downregulated
TLR8	CONTROL_Mild - HCM_Normal	-0.522373	4.81678e-05	0.000625142	Downregulated
TLR8	CONTROL_Normal - HCM_Normal	-0.517276	0.00106677	0.00721129	Downregulated
TLR9	CONTROL_Mild - HCM_Severe	-0.503458	1.08375e-05	0.000183794	Downregulated
TLR9	CONTROL_Normal - HCM_Severe	-0.547251	0.000160846	0.00166392	Downregulated
TLR9	CONTROL_Mild - HCM_Moderate	-0.464445	2.05821e-05	0.000313598	Downregulated
TLR9	CONTROL_Normal - HCM_Moderate	-0.508238	0.000434258	0.00365544	Downregulated
TLR9	CONTROL_Mild - HCM_Mild	-0.434842	8.81493e-05	0.00101711	Downregulated
TLR9	CONTROL_Normal - HCM_Mild	-0.478635	0.000211368	0.00206618	Downregulated
TLR9	CONTROL_Mild - HCM_Normal	-0.450489	3.92422e-05	0.000528978	Downregulated
TLR9	CONTROL_Normal - HCM_Normal	-0.494282	0.000582199	0.00459631	Downregulated
TMEFF2	CONTROL_Mild - HCM_Severe	-0.565476	6.83518e-06	0.000124929	Downregulated
TMEFF2	CONTROL_Normal - HCM_Severe	-0.526889	0.000527692	0.00425085	Downregulated
TMEFF2	CONTROL_Mild - HCM_Moderate	-0.592068	1.88893e-06	4.04772e-05	Downregulated
TMEFF2	CONTROL_Normal - HCM_Moderate	-0.553481	0.000943181	0.00655968	Downregulated
TMEFF2	CONTROL_Mild - HCM_Mild	-0.707904	2.07059e-07	6.14816e-06	Downregulated
TMEFF2	CONTROL_Normal - HCM_Mild	-0.669317	6.57957e-05	0.000802415	Downregulated
TMEFF2	CONTROL_Mild - HCM_Normal	-0.671563	3.34673e-07	9.21411e-06	Downregulated
TMEFF2	CONTROL_Normal - HCM_Normal	-0.632975	0.000697931	0.00527541	Downregulated
TMEM163	CONTROL_Mild - HCM_Severe	-0.613773	0.000123023	0.00134291	Downregulated
TMEM163	CONTROL_Normal - HCM_Severe	-0.583761	0.00233954	0.0127716	Downregulated
TMEM163	CONTROL_Mild - HCM_Moderate	-0.61948	9.89781e-05	0.00110968	Downregulated
TMEM163	CONTROL_Normal - HCM_Moderate	-0.589469	0.00302609	0.0155413	Downregulated
TMEM163	CONTROL_Mild - HCM_Mild	-0.770616	1.40249e-05	0.000228923	Downregulated
TMEM163	CONTROL_Normal - HCM_Mild	-0.740604	0.000640512	0.0049577	Downregulated
TMEM163	CONTROL_Mild - HCM_Normal	-0.813866	1.21196e-05	0.000201223	Downregulated
TMEM163	CONTROL_Normal - HCM_Normal	-0.783854	0.00123136	0.00795313	Downregulated
STING1	CONTROL_Mild - HCM_Mild	-0.386509	0.0090994	0.0359676	Downregulated
STING1	CONTROL_Normal - HCM_Mild	-0.404458	0.00986775	0.0381722	Downregulated
STING1	CONTROL_Mild - HCM_Normal	-0.380601	0.00925362	0.0363297	Downregulated
STING1	CONTROL_Normal - HCM_Normal	-0.39855	0.0120576	0.0446007	Downregulated
TMPRSS2	CONTROL_Mild - HCM_Severe	-0.564636	0.000140134	0.0014886	Downregulated
TMPRSS2	CONTROL_Normal - HCM_Severe	-0.539326	0.00393808	0.0188042	Downregulated
TMPRSS2	CONTROL_Mild - HCM_Moderate	-0.602122	6.35176e-05	0.000780513	Downregulated
TMPRSS2	CONTROL_Normal - HCM_Moderate	-0.576812	0.00462859	0.0212949	Downregulated
TMPRSS2	CONTROL_Mild - HCM_Mild	-0.613097	6.31605e-05	0.000778323	Downregulated
TMPRSS2	CONTROL_Normal - HCM_Mild	-0.587787	0.00203157	0.0115273	Downregulated
TMPRSS2	CONTROL_Mild - HCM_Normal	-0.602103	8.51833e-05	0.000994758	Downregulated
TMPRSS2	CONTROL_Normal - HCM_Normal	-0.576793	0.00505663	0.0228771	Downregulated
TNC	HCM_Normal - HCM_Severe	-0.166755	0.00946647	0.0369983	Downregulated
TNC	CONTROL_Mild - HCM_Severe	-0.521696	2.17496e-06	4.57057e-05	Downregulated
TNC	CONTROL_Normal - HCM_Severe	-0.454068	4.7569e-09	2.37845e-07	Downregulated
TNC	HCM_Normal - HCM_Moderate	-0.165556	0.0043519	0.0202793	Downregulated
TNC	CONTROL_Mild - HCM_Moderate	-0.520497	1.03773e-06	2.41397e-05	Downregulated
TNC	CONTROL_Normal - HCM_Moderate	-0.452869	3.68049e-10	2.83365e-08	Downregulated
TNC	CONTROL_Mild - HCM_Mild	-0.437335	6.74055e-05	0.000819033	Downregulated
TNC	CONTROL_Normal - HCM_Mild	-0.369707	2.01608e-06	4.299e-05	Downregulated
TNC	CONTROL_Mild - HCM_Normal	-0.354942	0.000462057	0.0038212	Downregulated
TNC	CONTROL_Normal - HCM_Normal	-0.287313	1.44101e-05	0.000233153	Downregulated
TNFAIP3	CONTROL_Mild - HCM_Severe	-0.421099	0.000691438	0.00523999	Downregulated
TNFAIP3	CONTROL_Normal - HCM_Severe	-0.521695	0.000587525	0.00462588	Downregulated
TNFAIP3	CONTROL_Mild - HCM_Moderate	-0.343541	0.00308012	0.0156983	Downregulated
TNFAIP3	CONTROL_Normal - HCM_Moderate	-0.444138	0.00194011	0.0111046	Downregulated
TNFAIP3	CONTROL_Normal - HCM_Mild	-0.322326	0.00562903	0.0247712	Downregulated
TNFAIP3	CONTROL_Normal - HCM_Normal	-0.337297	0.0068751	0.0289093	Downregulated
TNFAIP6	CONTROL_Mild - HCM_Severe	-0.481089	0.000217972	0.00211776	Downregulated
TNFAIP6	CONTROL_Normal - HCM_Severe	-0.408858	0.00423399	0.019861	Downregulated
TNFAIP6	CONTROL_Mild - HCM_Moderate	-0.554901	2.75266e-05	0.000398471	Downregulated
TNFAIP6	CONTROL_Normal - HCM_Moderate	-0.482669	0.00348468	0.0171087	Downregulated
TNFAIP6	CONTROL_Mild - HCM_Mild	-0.5821	2.67477e-05	0.000392419	Downregulated
TNFAIP6	CONTROL_Normal - HCM_Mild	-0.509868	0.00108122	0.0072638	Downregulated
TNFAIP6	CONTROL_Mild - HCM_Normal	-0.548367	4.18553e-05	0.000556791	Downregulated
TNFAIP6	CONTROL_Normal - HCM_Normal	-0.476135	0.00416573	0.0196433	Downregulated
TNFRSF10A	CONTROL_Mild - HCM_Severe	-0.610056	0.000392409	0.00337076	Downregulated
TNFRSF10A	CONTROL_Normal - HCM_Severe	-0.491664	2.65651e-05	0.000390399	Downregulated
TNFRSF10A	CONTROL_Mild - HCM_Moderate	-0.592119	0.000346922	0.00305488	Downregulated
TNFRSF10A	CONTROL_Normal - HCM_Moderate	-0.473727	1.0067e-05	0.000174651	Downregulated
TNFRSF10A	CONTROL_Mild - HCM_Mild	-0.777312	1.92147e-05	0.000294828	Downregulated
TNFRSF10A	CONTROL_Normal - HCM_Mild	-0.65892	3.65626e-07	9.75751e-06	Downregulated
TNFRSF10A	CONTROL_Mild - HCM_Normal	-0.781089	6.12925e-06	0.000113215	Downregulated
TNFRSF10A	CONTROL_Normal - HCM_Normal	-0.662697	1.1583e-08	5.14145e-07	Downregulated
TNFRSF10B	CONTROL_Mild - HCM_Severe	-0.510925	7.19704e-05	0.000860086	Downregulated
TNFRSF10B	CONTROL_Normal - HCM_Severe	-0.484685	0.00177269	0.0103924	Downregulated
TNFRSF10B	CONTROL_Mild - HCM_Moderate	-0.520307	4.71198e-05	0.000616454	Downregulated
TNFRSF10B	CONTROL_Normal - HCM_Moderate	-0.494066	0.00233486	0.0127596	Downregulated
TNFRSF10B	CONTROL_Mild - HCM_Mild	-0.70039	2.08018e-06	4.4033e-05	Downregulated
TNFRSF10B	CONTROL_Normal - HCM_Mild	-0.67415	0.000268985	0.00250286	Downregulated
TNFRSF10B	CONTROL_Mild - HCM_Normal	-0.686252	3.51175e-06	6.94369e-05	Downregulated
TNFRSF10B	CONTROL_Normal - HCM_Normal	-0.660012	0.000905977	0.00636914	Downregulated
TNFRSF11A	CONTROL_Mild - HCM_Severe	-0.556457	2.89846e-06	5.83719e-05	Downregulated
TNFRSF11A	CONTROL_Normal - HCM_Severe	-0.542925	0.00018049	0.00182589	Downregulated
TNFRSF11A	CONTROL_Mild - HCM_Moderate	-0.622798	2.55133e-07	7.37427e-06	Downregulated
TNFRSF11A	CONTROL_Normal - HCM_Moderate	-0.609266	0.000225988	0.0021653	Downregulated
TNFRSF11A	CONTROL_Mild - HCM_Mild	-0.638624	3.68337e-07	9.79979e-06	Downregulated
TNFRSF11A	CONTROL_Normal - HCM_Mild	-0.625093	3.67695e-05	0.000499836	Downregulated
TNFRSF11A	CONTROL_Mild - HCM_Normal	-0.707976	4.05082e-08	1.53896e-06	Downregulated
TNFRSF11A	CONTROL_Normal - HCM_Normal	-0.694444	0.000154663	0.00160953	Downregulated
TNFRSF11B	CONTROL_Mild - HCM_Severe	-0.340392	0.000149787	0.00157006	Downregulated
TNFRSF11B	CONTROL_Normal - HCM_Severe	-0.32644	2.45759e-07	7.12701e-06	Downregulated
TNFRSF11B	CONTROL_Mild - HCM_Moderate	-0.425192	2.13559e-06	4.49871e-05	Downregulated
TNFRSF11B	CONTROL_Normal - HCM_Moderate	-0.41124	4.75979e-11	5.55534e-09	Downregulated
TNFRSF11B	CONTROL_Mild - HCM_Mild	-0.385943	3.67583e-05	0.000499836	Downregulated
TNFRSF11B	CONTROL_Normal - HCM_Mild	-0.371991	5.11524e-08	1.89373e-06	Downregulated
TNFRSF11B	CONTROL_Mild - HCM_Normal	-0.40879	4.96377e-06	9.36763e-05	Downregulated
TNFRSF11B	CONTROL_Normal - HCM_Normal	-0.394838	2.49517e-10	2.02878e-08	Downregulated
TNFRSF14	CONTROL_Mild - HCM_Severe	-0.557214	3.33267e-05	0.000463166	Downregulated
TNFRSF14	CONTROL_Normal - HCM_Severe	-0.514066	0.00103795	0.00704928	Downregulated
TNFRSF14	CONTROL_Mild - HCM_Moderate	-0.486771	0.000115856	0.00127267	Downregulated
TNFRSF14	CONTROL_Normal - HCM_Moderate	-0.443624	0.00328866	0.016368	Downregulated
TNFRSF14	CONTROL_Mild - HCM_Mild	-0.52029	0.000101087	0.00113041	Downregulated
TNFRSF14	CONTROL_Normal - HCM_Mild	-0.477143	0.000919708	0.00643204	Downregulated
TNFRSF14	CONTROL_Mild - HCM_Normal	-0.515233	7.13305e-05	0.000853849	Downregulated
TNFRSF14	CONTROL_Normal - HCM_Normal	-0.472085	0.003065	0.0156671	Downregulated
TNFRSF1A	HCM_Mild - HCM_Severe	-0.193197	0.00607436	0.0263576	Downregulated
TNFRSF1A	HCM_Normal - HCM_Severe	-0.238783	0.00173811	0.0102449	Downregulated
TNFRSF1A	CONTROL_Mild - HCM_Severe	-0.262403	0.00220171	0.0122239	Downregulated
TNFRSF1A	CONTROL_Normal - HCM_Severe	-0.301379	0.0016564	0.00989744	Downregulated
TNFRSF1A	HCM_Mild - HCM_Moderate	-0.173469	0.00773158	0.0315579	Downregulated
TNFRSF1A	HCM_Normal - HCM_Moderate	-0.219055	0.00213226	0.0119297	Downregulated
TNFRSF1A	CONTROL_Mild - HCM_Moderate	-0.242675	0.00309665	0.0157181	Downregulated
TNFRSF1A	CONTROL_Normal - HCM_Moderate	-0.281651	0.00311807	0.01579	Downregulated
TOLLIP	HCM_Mild - HCM_Severe	-0.280659	9.49429e-05	0.00107552	Downregulated
TOLLIP	HCM_Normal - HCM_Severe	-0.244367	9.83413e-05	0.00110396	Downregulated
TOLLIP	CONTROL_Mild - HCM_Severe	-0.26147	0.00654063	0.0278665	Downregulated
TOLLIP	CONTROL_Normal - HCM_Severe	-0.248977	0.000159012	0.00165084	Downregulated
TOLLIP	HCM_Mild - HCM_Moderate	-0.29295	1.43428e-05	0.000233021	Downregulated
TOLLIP	HCM_Normal - HCM_Moderate	-0.256658	8.36055e-06	0.000148746	Downregulated
TOLLIP	CONTROL_Mild - HCM_Moderate	-0.273761	0.00322236	0.0161327	Downregulated
TOLLIP	CONTROL_Normal - HCM_Moderate	-0.261268	1.8843e-05	0.000290663	Downregulated
TP53	HCM_Mild - HCM_Severe	-0.347733	1.12135e-06	2.57407e-05	Downregulated
TP53	HCM_Normal - HCM_Severe	-0.320098	3.74097e-07	9.89252e-06	Downregulated
TP53	CONTROL_Mild - HCM_Severe	-0.382976	6.07371e-05	0.000752725	Downregulated
TP53	CONTROL_Normal - HCM_Severe	-0.399943	7.04476e-09	3.26008e-07	Downregulated
TP53	HCM_Mild - HCM_Moderate	-0.438916	6.04207e-10	4.17191e-08	Downregulated
TP53	HCM_Normal - HCM_Moderate	-0.411281	3.25168e-11	4.09995e-09	Downregulated
TP53	CONTROL_Mild - HCM_Moderate	-0.474159	7.11815e-07	1.75931e-05	Downregulated
TP53	CONTROL_Normal - HCM_Moderate	-0.491126	8.83131e-13	1.7868e-10	Downregulated
TXNIP	CONTROL_Mild - HCM_Severe	1.66282	0.00989147	0.03823	Upregulated
TXNIP	CONTROL_Normal - HCM_Severe	1.67661	0.0109781	0.0414057	Upregulated
TXNIP	CONTROL_Mild - HCM_Moderate	1.56014	0.0130873	0.0475207	Upregulated
TYK2	CONTROL_Mild - HCM_Severe	-0.413647	2.31131e-05	0.000346099	Downregulated
TYK2	CONTROL_Normal - HCM_Severe	-0.3939	1.48576e-08	6.4309e-07	Downregulated
TYK2	CONTROL_Mild - HCM_Moderate	-0.435	4.9464e-06	9.35515e-05	Downregulated
TYK2	CONTROL_Normal - HCM_Moderate	-0.415253	2.68836e-10	2.16562e-08	Downregulated
TYK2	CONTROL_Mild - HCM_Mild	-0.401806	5.5785e-05	0.000701343	Downregulated
TYK2	CONTROL_Normal - HCM_Mild	-0.382059	1.32275e-07	4.24645e-06	Downregulated
TYK2	CONTROL_Mild - HCM_Normal	-0.414358	1.2824e-05	0.000211304	Downregulated
TYK2	CONTROL_Normal - HCM_Normal	-0.394611	1.71085e-09	9.76221e-08	Downregulated
U2AF1	HCM_Mild - HCM_Severe	-0.20262	0.00356227	0.0173916	Downregulated
U2AF1	HCM_Normal - HCM_Severe	-0.202368	0.00341774	0.0168467	Downregulated
U2AF1	HCM_Mild - HCM_Moderate	-0.224922	0.00107628	0.00724176	Downregulated
U2AF1	HCM_Normal - HCM_Moderate	-0.22467	0.00134468	0.00852675	Downregulated
VCAN	HCM_Moderate - HCM_Severe	-0.16569	0.0116851	0.0436104	Downregulated
VCAN	HCM_Mild - HCM_Severe	-0.504239	7.09529e-09	3.26608e-07	Downregulated
VCAN	HCM_Normal - HCM_Severe	-0.481729	6.21209e-10	4.18955e-08	Downregulated
VCAN	CONTROL_Mild - HCM_Severe	-0.422374	0.000126863	0.00138136	Downregulated
VCAN	CONTROL_Normal - HCM_Severe	-0.468955	5.53303e-09	2.68924e-07	Downregulated
VCAN	HCM_Mild - HCM_Moderate	-0.338549	6.88455e-06	0.000125567	Downregulated
VCAN	HCM_Normal - HCM_Moderate	-0.316039	1.15184e-06	2.62331e-05	Downregulated
VCAN	CONTROL_Mild - HCM_Moderate	-0.256684	0.0116856	0.0436104	Downregulated
VCAN	CONTROL_Normal - HCM_Moderate	-0.303265	8.51658e-06	0.000150654	Downregulated
VEGFB	CONTROL_Mild - HCM_Severe	0.450715	0.000245422	0.00232589	Upregulated
VEGFB	CONTROL_Normal - HCM_Severe	0.37074	0.0035307	0.0172471	Upregulated
VEGFB	CONTROL_Mild - HCM_Moderate	0.417242	0.00039248	0.00337076	Upregulated
VEGFB	CONTROL_Normal - HCM_Moderate	0.337268	0.00594903	0.0259432	Upregulated
VEGFB	CONTROL_Mild - HCM_Mild	0.606404	1.14597e-05	0.000192099	Upregulated
VEGFB	CONTROL_Normal - HCM_Mild	0.526429	0.000486832	0.00399442	Upregulated
VEGFB	CONTROL_Mild - HCM_Normal	0.548252	3.6754e-05	0.000499836	Upregulated
VEGFB	CONTROL_Normal - HCM_Normal	0.468278	0.00164252	0.00983475	Upregulated
YTHDF2	CONTROL_Mild - HCM_Severe	-0.35458	3.74493e-05	0.000507491	Downregulated
YTHDF2	CONTROL_Normal - HCM_Severe	-0.282928	1.50654e-06	3.32662e-05	Downregulated
YTHDF2	CONTROL_Mild - HCM_Moderate	-0.351204	2.32078e-05	0.000346724	Downregulated
YTHDF2	CONTROL_Normal - HCM_Moderate	-0.279552	2.65861e-07	7.59329e-06	Downregulated
YTHDF2	CONTROL_Mild - HCM_Mild	-0.267047	0.00177852	0.0103986	Downregulated
YTHDF2	CONTROL_Normal - HCM_Mild	-0.195395	0.000924954	0.00645834	Downregulated
YTHDF2	CONTROL_Mild - HCM_Normal	-0.248205	0.00197798	0.0112842	Downregulated
YTHDF2	CONTROL_Normal - HCM_Normal	-0.176553	0.000586317	0.00462462	Downregulated
ZEB1	HCM_Moderate - HCM_Severe	-0.136947	0.0078663	0.0319649	Downregulated
ZEB1	HCM_Mild - HCM_Severe	-0.368466	3.77527e-08	1.44056e-06	Downregulated
ZEB1	HCM_Normal - HCM_Severe	-0.357656	2.55078e-09	1.35316e-07	Downregulated
ZEB1	CONTROL_Mild - HCM_Severe	0.240686	0.00397461	0.0189371	Upregulated
ZEB1	CONTROL_Normal - HCM_Severe	0.298982	6.38643e-07	1.59661e-05	Upregulated
ZEB1	HCM_Mild - HCM_Moderate	-0.231519	5.97165e-05	0.000742191	Downregulated
ZEB1	HCM_Normal - HCM_Moderate	-0.220709	9.34217e-06	0.000163535	Downregulated
ZEB1	CONTROL_Mild - HCM_Moderate	0.377633	8.51974e-06	0.000150654	Upregulated
ZEB1	CONTROL_Normal - HCM_Moderate	0.435929	1.88588e-12	3.3484e-10	Upregulated
ZEB1	CONTROL_Mild - HCM_Mild	0.609152	8.36006e-10	5.34798e-08	Upregulated
ZEB1	CONTROL_Normal - HCM_Mild	0.667448	1.02682e-16	7.44448e-14	Upregulated
ZEB1	CONTROL_Mild - HCM_Normal	0.598342	2.36863e-10	1.94407e-08	Upregulated
ZEB1	CONTROL_Normal - HCM_Normal	0.656638	5.7603e-19	1.25286e-15	Upregulated
ZEB2	HCM_Mild - HCM_Severe	-0.266879	0.010935	0.0413267	Downregulated
ZEB2	HCM_Normal - HCM_Severe	-0.332075	0.0029248	0.0151824	Downregulated
ZEB2	HCM_Normal - HCM_Moderate	-0.281641	0.0051799	0.0232774	Downregulated
AKT1	HCM_Mild - HCM_Severe	-0.381235	1.48602e-07	4.6673e-06	Downregulated
AKT1	HCM_Normal - HCM_Severe	-0.449641	5.23636e-11	5.69454e-09	Downregulated
AKT1	CONTROL_Mild - HCM_Severe	0.328901	0.000436029	0.00366199	Upregulated
AKT1	CONTROL_Normal - HCM_Severe	0.246532	8.99582e-05	0.00103387	Upregulated
AKT1	HCM_Mild - HCM_Moderate	-0.337262	3.75349e-07	9.89555e-06	Downregulated
AKT1	HCM_Normal - HCM_Moderate	-0.405667	4.46813e-11	5.32503e-09	Downregulated
AKT1	CONTROL_Mild - HCM_Moderate	0.372875	4.73712e-05	0.00061696	Upregulated
AKT1	CONTROL_Normal - HCM_Moderate	0.290506	1.08399e-06	2.50818e-05	Upregulated
AKT1	CONTROL_Mild - HCM_Mild	0.710136	1.48329e-10	1.37283e-08	Upregulated
AKT1	CONTROL_Normal - HCM_Mild	0.627767	3.61137e-14	1.25676e-11	Upregulated
AKT1	CONTROL_Mild - HCM_Normal	0.778542	1.13982e-12	2.15574e-10	Upregulated
AKT1	CONTROL_Normal - HCM_Normal	0.696173	2.47478e-18	4.30612e-15	Upregulated
B2M	CONTROL_Mild - HCM_Severe	1.68697	0.000434451	0.00365544	Upregulated
B2M	CONTROL_Normal - HCM_Severe	1.7218	0.000825408	0.00593475	Upregulated
B2M	CONTROL_Mild - HCM_Moderate	1.71882	0.000437698	0.00366751	Upregulated
B2M	CONTROL_Normal - HCM_Moderate	1.75365	0.000906322	0.00636914	Upregulated
B2M	CONTROL_Mild - HCM_Mild	1.41763	0.00109554	0.0073148	Upregulated
B2M	CONTROL_Normal - HCM_Mild	1.45246	0.00166472	0.00991314	Upregulated
B2M	CONTROL_Mild - HCM_Normal	1.32032	0.00180078	0.0104842	Upregulated
B2M	CONTROL_Normal - HCM_Normal	1.35515	0.00268433	0.0141623	Upregulated
CCND1	CONTROL_Mild - HCM_Severe	0.568054	0.00863964	0.0345227	Upregulated
CCND1	CONTROL_Normal - HCM_Severe	0.634267	0.0063579	0.0273154	Upregulated
CCND1	CONTROL_Mild - HCM_Moderate	0.559537	0.00907664	0.0359266	Upregulated
CCND1	CONTROL_Normal - HCM_Moderate	0.62575	0.00701138	0.0293351	Upregulated
CCND1	CONTROL_Mild - HCM_Mild	0.769974	0.00161607	0.00971652	Upregulated
CCND1	CONTROL_Normal - HCM_Mild	0.836186	0.0016024	0.00965437	Upregulated
CCND1	CONTROL_Mild - HCM_Normal	0.770765	0.0017296	0.010215	Upregulated
CCND1	CONTROL_Normal - HCM_Normal	0.836978	0.00186603	0.0107656	Upregulated
CD276	HCM_Normal - HCM_Severe	-0.165042	0.00253383	0.0135657	Downregulated
CD276	CONTROL_Mild - HCM_Severe	-0.261702	0.00259638	0.0138241	Downregulated
CD276	CONTROL_Normal - HCM_Severe	-0.2821	3.96089e-06	7.7264e-05	Downregulated
CD276	HCM_Normal - HCM_Moderate	-0.151956	0.0019956	0.0113519	Downregulated
CD276	CONTROL_Mild - HCM_Moderate	-0.248616	0.00287567	0.0149631	Downregulated
CD276	CONTROL_Normal - HCM_Moderate	-0.269014	1.57987e-06	3.45348e-05	Downregulated
CD276	CONTROL_Normal - HCM_Mild	-0.153446	0.0113033	0.0424788	Downregulated
CD47	CONTROL_Mild - HCM_Severe	-0.264938	0.00175529	0.0103043	Downregulated
CD47	CONTROL_Mild - HCM_Moderate	-0.229326	0.00401735	0.0191198	Downregulated
CD74	CONTROL_Mild - HCM_Moderate	0.91139	0.0135233	0.0487174	Upregulated
CD74	CONTROL_Mild - HCM_Mild	1.00907	0.00856191	0.0342476	Upregulated
CD74	CONTROL_Normal - HCM_Mild	1.01406	0.0101777	0.0390757	Upregulated
CTNNB1	CONTROL_Mild - HCM_Severe	0.644045	0.00136022	0.00860025	Upregulated
CTNNB1	CONTROL_Normal - HCM_Severe	0.736035	0.0014846	0.00914085	Upregulated
CTNNB1	CONTROL_Mild - HCM_Moderate	0.643472	0.00143521	0.00894437	Upregulated
CTNNB1	CONTROL_Normal - HCM_Moderate	0.735462	0.00174562	0.0102683	Upregulated
CTNNB1	CONTROL_Mild - HCM_Mild	0.528056	0.00378797	0.0182781	Upregulated
CTNNB1	CONTROL_Normal - HCM_Mild	0.620046	0.00287567	0.0149631	Upregulated
CTNNB1	CONTROL_Mild - HCM_Normal	0.549577	0.00332052	0.0164795	Upregulated
CTNNB1	CONTROL_Normal - HCM_Normal	0.641567	0.00299695	0.0154647	Upregulated
HLA-E	CONTROL_Mild - HCM_Severe	0.85473	5.51638e-07	1.3992e-05	Upregulated
HLA-E	CONTROL_Normal - HCM_Severe	0.854888	0.000135855	0.00146098	Upregulated
HLA-E	CONTROL_Mild - HCM_Moderate	0.922808	1.1032e-07	3.64936e-06	Upregulated
HLA-E	CONTROL_Normal - HCM_Moderate	0.922966	0.000201193	0.0019936	Upregulated
HLA-E	CONTROL_Mild - HCM_Mild	0.975292	6.99897e-08	2.48535e-06	Upregulated
HLA-E	CONTROL_Normal - HCM_Mild	0.975451	3.16663e-05	0.000445067	Upregulated
HLA-E	CONTROL_Mild - HCM_Normal	0.8884	3.15867e-07	8.72396e-06	Upregulated
HLA-E	CONTROL_Normal - HCM_Normal	0.888558	0.000279799	0.00258963	Upregulated
IL6	HCM_Mild - HCM_Moderate	-0.322493	0.0130304	0.0473734	Downregulated
IL6	HCM_Normal - HCM_Moderate	-0.334542	0.0092535	0.0363297	Downregulated
IL6	CONTROL_Normal - HCM_Moderate	-0.452218	0.00991905	0.0383026	Downregulated
ITGAV	CONTROL_Mild - HCM_Severe	0.950959	0.000848652	0.00606678	Upregulated
ITGAV	CONTROL_Mild - HCM_Moderate	0.935745	0.000983264	0.0067946	Upregulated
ITGAV	CONTROL_Mild - HCM_Mild	1.25285	0.000192393	0.00192173	Upregulated
ITGAV	CONTROL_Normal - HCM_Mild	1.08054	0.00751538	0.0309728	Upregulated
ITGAV	CONTROL_Mild - HCM_Normal	1.33245	0.000268194	0.00249816	Upregulated
ITGAV	CONTROL_Normal - HCM_Normal	1.16014	0.012087	0.0446729	Upregulated
LY6E	CONTROL_Mild - HCM_Severe	-0.305593	0.00831454	0.033485	Downregulated
LY6E	HCM_Mild - HCM_Moderate	-0.231296	0.0112373	0.0422676	Downregulated
LY6E	HCM_Normal - HCM_Moderate	-0.220999	0.0127922	0.0466633	Downregulated
LY6E	CONTROL_Mild - HCM_Moderate	-0.372313	0.00144529	0.00896862	Downregulated
PTEN	HCM_Mild - HCM_Severe	-0.229086	2.24235e-05	0.000336934	Downregulated
PTEN	HCM_Normal - HCM_Severe	-0.23484	1.25507e-06	2.82148e-05	Downregulated
PTEN	HCM_Mild - HCM_Moderate	-0.277768	1.15855e-07	3.80353e-06	Downregulated
PTEN	HCM_Normal - HCM_Moderate	-0.283522	1.12307e-09	6.92959e-08	Downregulated
PTEN	CONTROL_Mild - HCM_Mild	0.308316	5.55736e-05	0.000699697	Upregulated
PTEN	CONTROL_Normal - HCM_Mild	0.251214	3.16025e-06	6.29157e-05	Upregulated
PTEN	CONTROL_Mild - HCM_Normal	0.314071	1.56751e-05	0.000250686	Upregulated
PTEN	CONTROL_Normal - HCM_Normal	0.256968	1.02907e-07	3.43025e-06	Upregulated
RPS6	CONTROL_Mild - HCM_Severe	1.53473	2.58143e-05	0.000380008	Upregulated
RPS6	CONTROL_Normal - HCM_Severe	1.50828	0.00015282	0.00159608	Upregulated
RPS6	CONTROL_Mild - HCM_Moderate	1.58559	2.3362e-05	0.000347794	Upregulated
RPS6	CONTROL_Normal - HCM_Moderate	1.55915	0.000169896	0.00174099	Upregulated
RPS6	CONTROL_Mild - HCM_Mild	1.68989	1.05253e-05	0.000179576	Upregulated
RPS6	CONTROL_Normal - HCM_Mild	1.66344	7.23264e-05	0.000863154	Upregulated
RPS6	CONTROL_Mild - HCM_Normal	1.6416	1.90417e-05	0.000293209	Upregulated
RPS6	CONTROL_Normal - HCM_Normal	1.61515	0.000137712	0.00147494	Upregulated
STAT1	HCM_Mild - HCM_Severe	-0.430073	1.44448e-05	0.000233153	Downregulated
STAT1	HCM_Normal - HCM_Severe	-0.390133	0.00012954	0.00140173	Downregulated
STAT1	CONTROL_Mild - HCM_Severe	-0.398096	2.46292e-05	0.000364411	Downregulated
STAT1	CONTROL_Normal - HCM_Severe	-0.285589	0.0030839	0.0157084	Downregulated
STAT1	HCM_Mild - HCM_Moderate	-0.376319	3.28712e-05	0.000457567	Downregulated
STAT1	HCM_Normal - HCM_Moderate	-0.336379	0.000294896	0.00270063	Downregulated
STAT1	CONTROL_Mild - HCM_Moderate	-0.344342	9.9762e-05	0.00111703	Downregulated
STAT1	CONTROL_Normal - HCM_Moderate	-0.231835	0.00977455	0.0379303	Downregulated
VEGFA	CONTROL_Mild - HCM_Severe	0.587116	0.000485408	0.00398777	Upregulated
VEGFA	CONTROL_Normal - HCM_Severe	0.55906	0.00190527	0.0109484	Upregulated
VEGFA	CONTROL_Mild - HCM_Moderate	0.543474	0.000768	0.00564325	Upregulated
VEGFA	CONTROL_Normal - HCM_Moderate	0.515418	0.00308806	0.0157112	Upregulated
VEGFA	CONTROL_Mild - HCM_Mild	0.473658	0.00263817	0.0139913	Upregulated
VEGFA	CONTROL_Normal - HCM_Mild	0.445602	0.00548266	0.0242744	Upregulated
VEGFA	CONTROL_Mild - HCM_Normal	0.472106	0.00247821	0.0133418	Upregulated
VEGFA	CONTROL_Normal - HCM_Normal	0.44405	0.00650045	0.0277089	Upregulated
VSIR	CONTROL_Mild - HCM_Severe	-0.440021	0.00636927	0.0273373	Downregulated
GPI	CONTROL_Mild - HCM_Severe	0.987593	0.000145481	0.00153703	Upregulated
GPI	CONTROL_Normal - HCM_Severe	0.929195	0.000572466	0.00454006	Upregulated
GPI	CONTROL_Mild - HCM_Moderate	0.954999	0.000195583	0.00194911	Upregulated
GPI	CONTROL_Normal - HCM_Moderate	0.896601	0.000802067	0.00582469	Upregulated
GPI	CONTROL_Mild - HCM_Mild	0.898156	0.000266578	0.00248577	Upregulated
GPI	CONTROL_Normal - HCM_Mild	0.839758	0.000885676	0.00626454	Upregulated
GPI	CONTROL_Mild - HCM_Normal	0.92558	0.000252224	0.00237484	Upregulated
GPI	CONTROL_Normal - HCM_Normal	0.867182	0.000940282	0.00655243	Upregulated
POLR2A	CONTROL_Normal - HCM_Mild	-0.315659	0.0134907	0.0486202	Downregulated
RAB7A	CONTROL_Mild - HCM_Severe	0.387367	0.0014581	0.00902878	Upregulated
RAB7A	CONTROL_Normal - HCM_Severe	0.418673	0.0017752	0.0103977	Upregulated
RAB7A	CONTROL_Mild - HCM_Moderate	0.304726	0.00587765	0.0256834	Upregulated
RAB7A	CONTROL_Normal - HCM_Moderate	0.336032	0.00540479	0.0239907	Upregulated
RAB7A	CONTROL_Mild - HCM_Mild	0.281716	0.0100292	0.0385905	Upregulated
RAB7A	CONTROL_Normal - HCM_Mild	0.313022	0.00706771	0.0295195	Upregulated
RAB7A	CONTROL_Mild - HCM_Normal	0.29739	0.00722769	0.0300291	Upregulated
RAB7A	CONTROL_Normal - HCM_Normal	0.328696	0.00619319	0.0267531	Upregulated
SDHA	CONTROL_Mild - HCM_Severe	1.05002	0.000298256	0.00272772	Upregulated
SDHA	CONTROL_Normal - HCM_Severe	1.0577	0.000666679	0.00510384	Upregulated
SDHA	CONTROL_Mild - HCM_Moderate	1.04768	0.00032781	0.00293109	Upregulated
SDHA	CONTROL_Normal - HCM_Moderate	1.05536	0.000795304	0.00578534	Upregulated
SDHA	CONTROL_Mild - HCM_Mild	0.987759	0.000413286	0.00352163	Upregulated
SDHA	CONTROL_Normal - HCM_Mild	0.995438	0.000817495	0.00589247	Upregulated
SDHA	CONTROL_Mild - HCM_Normal	0.98987	0.000472663	0.00389779	Upregulated
SDHA	CONTROL_Normal - HCM_Normal	0.997549	0.00101297	0.00693382	Upregulated
TBC1D10B	CONTROL_Mild - HCM_Severe	-0.348514	0.00106924	0.00722236	Downregulated
TBC1D10B	CONTROL_Normal - HCM_Severe	-0.420997	0.000988656	0.00680484	Downregulated
TBC1D10B	HCM_Mild - HCM_Moderate	-0.198447	0.0117651	0.0438543	Downregulated
TBC1D10B	HCM_Normal - HCM_Moderate	-0.200417	0.00998223	0.0384442	Downregulated
TBC1D10B	CONTROL_Mild - HCM_Moderate	-0.424632	0.000126579	0.00138	Downregulated
TBC1D10B	CONTROL_Normal - HCM_Moderate	-0.497115	0.000573902	0.00454731	Downregulated
TBC1D10B	CONTROL_Normal - HCM_Mild	-0.298668	0.00495457	0.0224973	Downregulated
TBC1D10B	CONTROL_Normal - HCM_Normal	-0.296698	0.00660177	0.0280858	Downregulated
UBB	CONTROL_Mild - HCM_Severe	1.39036	0.00209983	0.011809	Upregulated
UBB	CONTROL_Normal - HCM_Severe	1.22676	0.00478186	0.0218728	Upregulated
UBB	CONTROL_Mild - HCM_Moderate	1.39903	0.002307	0.012679	Upregulated
UBB	CONTROL_Normal - HCM_Moderate	1.23543	0.0052306	0.0234206	Upregulated
UBB	CONTROL_Mild - HCM_Mild	1.25471	0.00300466	0.0154769	Upregulated
UBB	CONTROL_Normal - HCM_Mild	1.09111	0.00683325	0.028803	Upregulated
UBB	CONTROL_Mild - HCM_Normal	1.2845	0.00305284	0.0156417	Upregulated
UBB	CONTROL_Normal - HCM_Normal	1.12089	0.00688638	0.0289428	Upregulated
C1QA	HCM_Mild - HCM_Severe	-0.379813	0.00377055	0.0182041	Downregulated
C1QA	HCM_Normal - HCM_Severe	-0.396568	0.00317779	0.0159531	Downregulated
C1QA	CONTROL_Mild - HCM_Severe	-0.524439	0.000733853	0.00547558	Downregulated
C1QA	CONTROL_Normal - HCM_Severe	-0.595801	0.00141807	0.00888208	Downregulated
C1QA	HCM_Mild - HCM_Moderate	-0.281254	0.0137514	0.0492943	Downregulated
C1QA	HCM_Normal - HCM_Moderate	-0.298008	0.00988085	0.0382059	Downregulated
C1QA	CONTROL_Mild - HCM_Moderate	-0.42588	0.00313629	0.0158362	Downregulated
C1QA	CONTROL_Normal - HCM_Moderate	-0.497241	0.00402079	0.0191255	Downregulated
CCL13	CONTROL_Mild - HCM_Severe	-0.535773	0.00137457	0.0086532	Downregulated
CCL13	CONTROL_Normal - HCM_Severe	-0.583089	0.00310471	0.0157499	Downregulated
CCL13	CONTROL_Mild - HCM_Moderate	-0.522959	0.00133017	0.00844089	Downregulated
CCL13	CONTROL_Normal - HCM_Moderate	-0.570275	0.00417058	0.0196491	Downregulated
CCL13	CONTROL_Mild - HCM_Mild	-0.419268	0.00840782	0.0337399	Downregulated
CCL13	CONTROL_Normal - HCM_Mild	-0.466584	0.00695296	0.0291853	Downregulated
CCL13	CONTROL_Mild - HCM_Normal	-0.378019	0.0131003	0.0475442	Downregulated
CCL13	CONTROL_Normal - HCM_Normal	-0.425335	0.0132768	0.0480684	Downregulated
CD58	HCM_Mild - HCM_Severe	-0.277403	0.00013816	0.00147494	Downregulated
CD58	HCM_Normal - HCM_Severe	-0.242043	0.00013889	0.00147994	Downregulated
CD58	CONTROL_Mild - HCM_Severe	-0.320922	0.00120011	0.00783791	Downregulated
CD58	CONTROL_Normal - HCM_Severe	-0.31425	5.36898e-06	0.000100452	Downregulated
CD58	HCM_Mild - HCM_Moderate	-0.268632	7.04583e-05	0.000847838	Downregulated
CD58	HCM_Normal - HCM_Moderate	-0.233272	5.03748e-05	0.000645451	Downregulated
CD58	CONTROL_Mild - HCM_Moderate	-0.312151	0.00105553	0.00714642	Downregulated
CD58	CONTROL_Normal - HCM_Moderate	-0.305478	1.50526e-06	3.32662e-05	Downregulated
CD99	HCM_Normal - HCM_Severe	-0.237158	0.0139385	0.0498211	Downregulated
CD99	HCM_Normal - HCM_Moderate	-0.239927	0.00952473	0.0371759	Downregulated
CD99	CONTROL_Mild - HCM_Mild	0.454208	0.00124924	0.0080328	Upregulated
CD99	CONTROL_Normal - HCM_Mild	0.377303	0.00733973	0.0304067	Upregulated
CD99	CONTROL_Mild - HCM_Normal	0.49092	0.000779943	0.0057117	Upregulated
CD99	CONTROL_Normal - HCM_Normal	0.414015	0.00628796	0.0270416	Upregulated
HNF1A	CONTROL_Mild - HCM_Severe	-0.763946	1.76011e-07	5.3919e-06	Downregulated
HNF1A	CONTROL_Normal - HCM_Severe	-0.691465	4.98975e-11	5.59521e-09	Downregulated
HNF1A	CONTROL_Mild - HCM_Moderate	-0.742643	1.35372e-07	4.29829e-06	Downregulated
HNF1A	CONTROL_Normal - HCM_Moderate	-0.670162	6.56466e-12	1.01987e-09	Downregulated
HNF1A	CONTROL_Mild - HCM_Mild	-0.748619	4.99497e-07	1.28569e-05	Downregulated
HNF1A	CONTROL_Normal - HCM_Mild	-0.676138	5.87707e-10	4.09044e-08	Downregulated
HNF1A	CONTROL_Mild - HCM_Normal	-0.730476	2.22885e-07	6.59559e-06	Downregulated
HNF1A	CONTROL_Normal - HCM_Normal	-0.657994	1.88671e-11	2.64748e-09	Downregulated
IRAK1	HCM_Mild - HCM_Severe	-0.291914	0.00407159	0.0193145	Downregulated
IRAK1	HCM_Normal - HCM_Severe	-0.289347	0.00487624	0.0221995	Downregulated
IRAK1	CONTROL_Mild - HCM_Severe	-0.492239	0.000112478	0.00124025	Downregulated
IRAK1	CONTROL_Normal - HCM_Severe	-0.556676	0.000903868	0.00636218	Downregulated
IRAK1	CONTROL_Mild - HCM_Moderate	-0.383996	0.000849522	0.00606802	Downregulated
IRAK1	CONTROL_Normal - HCM_Moderate	-0.448432	0.00307305	0.0156807	Downregulated
ITGA6	HCM_Normal - HCM_Severe	-0.193856	0.0122525	0.0451177	Downregulated
ITGA6	CONTROL_Mild - HCM_Severe	-0.278907	0.0118719	0.0441392	Downregulated
ITGA6	HCM_Normal - HCM_Moderate	-0.176668	0.0135876	0.0488683	Downregulated
KEAP1	CONTROL_Mild - HCM_Severe	-0.50014	5.07015e-07	1.30119e-05	Downregulated
KEAP1	CONTROL_Normal - HCM_Severe	-0.436542	6.11338e-10	4.18126e-08	Downregulated
KEAP1	CONTROL_Mild - HCM_Moderate	-0.481919	4.76977e-07	1.23503e-05	Downregulated
KEAP1	CONTROL_Normal - HCM_Moderate	-0.418321	1.30775e-10	1.25026e-08	Downregulated
KEAP1	CONTROL_Mild - HCM_Mild	-0.493934	1.1613e-06	2.63794e-05	Downregulated
KEAP1	CONTROL_Normal - HCM_Mild	-0.430336	4.80482e-09	2.38868e-07	Downregulated
KEAP1	CONTROL_Mild - HCM_Normal	-0.467515	1.00577e-06	2.37133e-05	Downregulated
KEAP1	CONTROL_Normal - HCM_Normal	-0.403917	5.55597e-10	3.96204e-08	Downregulated
LTBR	HCM_Mild - HCM_Severe	-0.451856	0.00301246	0.0154988	Downregulated
LTBR	HCM_Normal - HCM_Severe	-0.444495	0.00352725	0.0172471	Downregulated
LTBR	CONTROL_Mild - HCM_Severe	-0.603765	0.00430406	0.0200887	Downregulated
LTBR	CONTROL_Normal - HCM_Severe	-0.677627	0.00808711	0.0327246	Downregulated
LTBR	HCM_Mild - HCM_Moderate	-0.349778	0.00830356	0.033485	Downregulated
LTBR	HCM_Normal - HCM_Moderate	-0.342417	0.00929216	0.0364316	Downregulated
LTBR	CONTROL_Mild - HCM_Moderate	-0.501688	0.00963991	0.0375436	Downregulated
PCNA	CONTROL_Mild - HCM_Severe	-0.365998	0.00162679	0.00974981	Downregulated
PCNA	CONTROL_Normal - HCM_Severe	-0.427354	0.00171423	0.0101386	Downregulated
PCNA	CONTROL_Mild - HCM_Moderate	-0.364568	0.00134633	0.00853102	Downregulated
PCNA	CONTROL_Normal - HCM_Moderate	-0.425923	0.00207471	0.0117279	Downregulated
PCNA	CONTROL_Normal - HCM_Mild	-0.318263	0.0063775	0.0273591	Downregulated
PCNA	CONTROL_Normal - HCM_Normal	-0.301845	0.00979554	0.0379605	Downregulated
PLA2G5	CONTROL_Mild - HCM_Severe	-0.298004	0.00107095	0.00722827	Downregulated
PLA2G5	CONTROL_Mild - HCM_Moderate	-0.388727	0.000142824	0.00151349	Downregulated
PNOC	CONTROL_Mild - HCM_Severe	-0.504523	0.000335118	0.00298372	Downregulated
PNOC	CONTROL_Normal - HCM_Severe	-0.560496	0.000561174	0.00446762	Downregulated
PNOC	CONTROL_Mild - HCM_Moderate	-0.542156	9.13707e-05	0.00104871	Downregulated
PNOC	CONTROL_Normal - HCM_Moderate	-0.598129	0.000764898	0.00563335	Downregulated
PNOC	CONTROL_Mild - HCM_Mild	-0.408938	0.00318852	0.0159885	Downregulated
PNOC	CONTROL_Normal - HCM_Mild	-0.464912	0.00107312	0.00723734	Downregulated
PNOC	CONTROL_Mild - HCM_Normal	-0.419355	0.00166271	0.00991246	Downregulated
PNOC	CONTROL_Normal - HCM_Normal	-0.475328	0.00243282	0.0131597	Downregulated
RELA	CONTROL_Mild - HCM_Severe	-0.317018	0.000317109	0.00285891	Downregulated
RELA	CONTROL_Normal - HCM_Severe	-0.232274	8.55267e-05	0.00099743	Downregulated
RELA	CONTROL_Mild - HCM_Moderate	-0.281432	0.000795317	0.00578534	Downregulated
RELA	CONTROL_Normal - HCM_Moderate	-0.196688	0.000221608	0.00213306	Downregulated
RELA	CONTROL_Mild - HCM_Mild	-0.243024	0.00590076	0.0257714	Downregulated
RELA	CONTROL_Normal - HCM_Mild	-0.15828	0.00875921	0.0348446	Downregulated
RELA	CONTROL_Mild - HCM_Normal	-0.233649	0.00491701	0.02235	Downregulated
RELA	CONTROL_Normal - HCM_Normal	-0.148905	0.00467001	0.0214601	Downregulated
SOX9	HCM_Mild - HCM_Severe	-0.252472	0.00141284	0.0088621	Downregulated
SOX9	HCM_Normal - HCM_Severe	-0.248885	0.000367384	0.00318034	Downregulated
SOX9	CONTROL_Mild - HCM_Severe	-0.366301	0.000888627	0.00627521	Downregulated
SOX9	CONTROL_Normal - HCM_Severe	-0.361606	2.73648e-06	5.5495e-05	Downregulated
SOX9	HCM_Mild - HCM_Moderate	-0.245763	0.000807739	0.00585611	Downregulated
SOX9	HCM_Normal - HCM_Moderate	-0.242176	0.000130009	0.00140332	Downregulated
SOX9	CONTROL_Mild - HCM_Moderate	-0.359591	0.000701709	0.00529376	Downregulated
SOX9	CONTROL_Normal - HCM_Moderate	-0.354897	5.92799e-07	1.49056e-05	Downregulated
C1R	HCM_Mild - HCM_Severe	-0.730461	0.000250638	0.00236246	Downregulated
C1R	HCM_Normal - HCM_Severe	-0.799597	0.000288571	0.00265151	Downregulated
C1R	CONTROL_Mild - HCM_Severe	-0.569953	0.00184462	0.0106633	Downregulated
C1R	CONTROL_Normal - HCM_Severe	-0.554053	0.00715447	0.0298389	Downregulated
C1R	HCM_Mild - HCM_Moderate	-0.573459	0.000823002	0.00592235	Downregulated
C1R	HCM_Normal - HCM_Moderate	-0.642595	0.00081112	0.0058635	Downregulated
C1R	CONTROL_Mild - HCM_Moderate	-0.412951	0.0121639	0.0448985	Downregulated
CCL3/L1	HCM_Mild - HCM_Severe	0.394609	0.011659	0.0435899	Upregulated
CCL3/L1	HCM_Normal - HCM_Severe	0.406795	0.0073238	0.0303559	Upregulated
CCL3/L1	HCM_Mild - HCM_Moderate	0.439471	0.00295934	0.015316	Upregulated
CCL3/L1	HCM_Normal - HCM_Moderate	0.451657	0.00156822	0.00951431	Upregulated
CTSL	HCM_Normal - HCM_Severe	-0.136799	0.00110577	0.00736616	Downregulated
CTSL	CONTROL_Mild - HCM_Severe	-0.198442	0.00270404	0.0142577	Downregulated
CTSL	CONTROL_Normal - HCM_Severe	-0.260002	7.58591e-08	2.66119e-06	Downregulated
CTSL	HCM_Normal - HCM_Moderate	-0.096294	0.00918224	0.0361168	Downregulated
CTSL	CONTROL_Mild - HCM_Moderate	-0.157937	0.0118693	0.0441392	Downregulated
CTSL	CONTROL_Normal - HCM_Moderate	-0.219497	3.87663e-07	1.01893e-05	Downregulated
CTSL	CONTROL_Normal - HCM_Mild	-0.195858	5.14238e-05	0.000656956	Downregulated
CTSL	CONTROL_Normal - HCM_Normal	-0.123203	0.00237244	0.0129163	Downregulated
CXADR	HCM_Mild - HCM_Severe	-0.236551	0.0131458	0.0476535	Downregulated
CXADR	CONTROL_Mild - HCM_Severe	-0.520693	5.59676e-05	0.000702623	Downregulated
CXADR	CONTROL_Normal - HCM_Severe	-0.398771	0.0027539	0.0144445	Downregulated
CXADR	CONTROL_Mild - HCM_Moderate	-0.496108	6.78588e-05	0.000821101	Downregulated
CXADR	CONTROL_Normal - HCM_Moderate	-0.374186	0.00459567	0.0211547	Downregulated
CXADR	CONTROL_Mild - HCM_Mild	-0.284142	0.0134882	0.0486202	Downregulated
CXADR	CONTROL_Mild - HCM_Normal	-0.335753	0.00331465	0.0164597	Downregulated
FN1	HCM_Mild - HCM_Severe	-0.882011	0.00157877	0.00954814	Downregulated
FN1	HCM_Normal - HCM_Severe	-0.934162	0.00136968	0.00864745	Downregulated
FN1	HCM_Mild - HCM_Moderate	-0.657667	0.00616576	0.026663	Downregulated
FN1	HCM_Normal - HCM_Moderate	-0.709818	0.00447869	0.0207811	Downregulated
FN1	CONTROL_Mild - HCM_Mild	1.12771	0.000502223	0.00409497	Upregulated
FN1	CONTROL_Normal - HCM_Mild	1.12411	0.00197502	0.0112747	Upregulated
FN1	CONTROL_Mild - HCM_Normal	1.17986	0.000319351	0.00287316	Upregulated
FN1	CONTROL_Normal - HCM_Normal	1.17626	0.00273399	0.0143634	Upregulated
KDM5C	HCM_Mild - HCM_Severe	-0.35805	2.66257e-06	5.41223e-05	Downregulated
KDM5C	HCM_Normal - HCM_Severe	-0.333156	7.57053e-07	1.86055e-05	Downregulated
KDM5C	CONTROL_Mild - HCM_Severe	-0.539249	5.22726e-07	1.33364e-05	Downregulated
KDM5C	CONTROL_Normal - HCM_Severe	-0.447915	2.48946e-09	1.32873e-07	Downregulated
KDM5C	HCM_Mild - HCM_Moderate	-0.306162	1.05269e-05	0.000179576	Downregulated
KDM5C	HCM_Normal - HCM_Moderate	-0.281268	2.52919e-06	5.20188e-05	Downregulated
KDM5C	CONTROL_Mild - HCM_Moderate	-0.487362	1.79286e-06	3.85133e-05	Downregulated
KDM5C	CONTROL_Normal - HCM_Moderate	-0.396028	5.10967e-09	2.51153e-07	Downregulated
MAF	CONTROL_Mild - HCM_Severe	-0.488195	0.00640112	0.0274199	Downregulated
MAF	CONTROL_Normal - HCM_Severe	-0.538239	0.0105045	0.0400814	Downregulated
MAF	CONTROL_Mild - HCM_Moderate	-0.494732	0.00527615	0.0235639	Downregulated
MAF	CONTROL_Normal - HCM_Moderate	-0.544776	0.0114615	0.0429807	Downregulated
MAPK11	CONTROL_Mild - HCM_Severe	-0.513879	1.01543e-05	0.000175081	Downregulated
MAPK11	CONTROL_Normal - HCM_Severe	-0.49196	0.00109331	0.00731115	Downregulated
MAPK11	CONTROL_Mild - HCM_Moderate	-0.555927	2.54471e-06	5.21056e-05	Downregulated
MAPK11	CONTROL_Normal - HCM_Moderate	-0.534008	0.00147119	0.00908479	Downregulated
MAPK11	CONTROL_Mild - HCM_Mild	-0.513104	1.10806e-05	0.000186824	Downregulated
MAPK11	CONTROL_Normal - HCM_Mild	-0.491185	0.000652494	0.00501475	Downregulated
MAPK11	CONTROL_Mild - HCM_Normal	-0.489235	1.8031e-05	0.000279626	Downregulated
MAPK11	CONTROL_Normal - HCM_Normal	-0.467316	0.00261235	0.0138836	Downregulated
MMP3	HCM_Normal - HCM_Severe	-0.200582	0.00330465	0.0164218	Downregulated
MMP3	CONTROL_Mild - HCM_Severe	-0.75209	1.49932e-09	8.69543e-08	Downregulated
MMP3	CONTROL_Normal - HCM_Severe	-0.675919	1.10773e-13	3.32318e-11	Downregulated
MMP3	HCM_Normal - HCM_Moderate	-0.206754	0.000854062	0.00609044	Downregulated
MMP3	CONTROL_Mild - HCM_Moderate	-0.758263	3.89161e-10	2.94409e-08	Downregulated
MMP3	CONTROL_Normal - HCM_Moderate	-0.682091	2.36366e-15	1.37092e-12	Downregulated
MMP3	CONTROL_Mild - HCM_Mild	-0.629152	2.39626e-07	7.01936e-06	Downregulated
MMP3	CONTROL_Normal - HCM_Mild	-0.55298	4.80719e-10	3.48521e-08	Downregulated
MMP3	CONTROL_Mild - HCM_Normal	-0.551509	1.03021e-06	2.4083e-05	Downregulated
MMP3	CONTROL_Normal - HCM_Normal	-0.475337	6.15174e-10	4.18126e-08	Downregulated
NSD1	CONTROL_Mild - HCM_Severe	-0.527267	0.000419849	0.00356359	Downregulated
NSD1	CONTROL_Normal - HCM_Severe	-0.464499	0.00265471	0.0140401	Downregulated
NSD1	CONTROL_Mild - HCM_Moderate	-0.569436	0.00011635	0.00127648	Downregulated
NSD1	CONTROL_Normal - HCM_Moderate	-0.506668	0.00259143	0.0138146	Downregulated
NSD1	CONTROL_Mild - HCM_Mild	-0.448697	0.00240146	0.0130243	Downregulated
NSD1	CONTROL_Normal - HCM_Mild	-0.385928	0.00534774	0.0237738	Downregulated
NSD1	CONTROL_Mild - HCM_Normal	-0.419226	0.00287432	0.0149631	Downregulated
NSD1	CONTROL_Normal - HCM_Normal	-0.356457	0.0114344	0.0428976	Downregulated
RPL7A	CONTROL_Mild - HCM_Severe	1.1892	9.69494e-05	0.00109308	Upregulated
RPL7A	CONTROL_Normal - HCM_Severe	1.07105	0.000544318	0.00436056	Upregulated
RPL7A	CONTROL_Mild - HCM_Moderate	1.18681	0.000110422	0.00121913	Upregulated
RPL7A	CONTROL_Normal - HCM_Moderate	1.06865	0.000662243	0.00507622	Upregulated
RPL7A	CONTROL_Mild - HCM_Mild	1.2507	6.09366e-05	0.000754122	Upregulated
RPL7A	CONTROL_Normal - HCM_Mild	1.13255	0.000355861	0.00310531	Upregulated
RPL7A	CONTROL_Mild - HCM_Normal	1.2741	7.04394e-05	0.000847838	Upregulated
RPL7A	CONTROL_Normal - HCM_Normal	1.15594	0.000440884	0.00368167	Upregulated
RPS27A	CONTROL_Mild - HCM_Severe	0.895019	9.33786e-08	3.14881e-06	Upregulated
RPS27A	CONTROL_Normal - HCM_Severe	0.889752	0.000209464	0.0020545	Upregulated
RPS27A	CONTROL_Mild - HCM_Moderate	0.834912	1.85372e-07	5.61928e-06	Upregulated
RPS27A	CONTROL_Normal - HCM_Moderate	0.829644	0.000574709	0.00454956	Upregulated
RPS27A	CONTROL_Mild - HCM_Mild	0.951917	3.18448e-08	1.24238e-06	Upregulated
RPS27A	CONTROL_Normal - HCM_Mild	0.94665	7.60388e-05	0.000893969	Upregulated
RPS27A	CONTROL_Mild - HCM_Normal	0.939112	7.04524e-08	2.49161e-06	Upregulated
RPS27A	CONTROL_Normal - HCM_Normal	0.933844	0.000439102	0.00367326	Upregulated
TPM1	CONTROL_Mild - HCM_Severe	3.07804	3.44021e-05	0.000474323	Upregulated
TPM1	CONTROL_Normal - HCM_Severe	3.18182	0.000578415	0.00457212	Upregulated
TPM1	CONTROL_Mild - HCM_Moderate	3.04871	4.57633e-05	0.000601421	Upregulated
TPM1	CONTROL_Normal - HCM_Moderate	3.15249	0.000879668	0.0062271	Upregulated
TPM1	CONTROL_Mild - HCM_Mild	3.01415	2.95393e-05	0.00042338	Upregulated
TPM1	CONTROL_Normal - HCM_Mild	3.11792	0.000452935	0.00377085	Upregulated
TPM1	CONTROL_Mild - HCM_Normal	3.06134	4.92443e-05	0.000633766	Upregulated
TPM1	CONTROL_Normal - HCM_Normal	3.16512	0.000848334	0.00606678	Upregulated
CST2	CONTROL_Normal - HCM_Moderate	-0.484266	0.0074296	0.0306775	Downregulated
E2F4	CONTROL_Normal - HCM_Severe	-0.244133	0.000278243	0.00257797	Downregulated
E2F4	CONTROL_Mild - HCM_Moderate	-0.250214	0.00805102	0.0326089	Downregulated
E2F4	CONTROL_Normal - HCM_Moderate	-0.283667	6.96178e-06	0.00012671	Downregulated
E2F4	CONTROL_Normal - HCM_Mild	-0.214408	0.00223441	0.0123897	Downregulated
E2F4	CONTROL_Normal - HCM_Normal	-0.220806	0.000353387	0.00309303	Downregulated
HSPA1A	HCM_Mild - HCM_Severe	0.645455	0.00936654	0.0366572	Upregulated
HSPA1A	CONTROL_Mild - HCM_Severe	0.796243	0.00685662	0.0288542	Upregulated
HSPA1A	CONTROL_Normal - HCM_Severe	0.710219	0.0139329	0.0498211	Upregulated
KRT10	CONTROL_Mild - HCM_Moderate	-0.256064	0.00333344	0.0165342	Downregulated
MAGEA12	HCM_Mild - HCM_Severe	-0.246789	0.0125613	0.0459287	Downregulated
MAGEA12	HCM_Normal - HCM_Severe	-0.261435	0.00278156	0.0145638	Downregulated
MAGEA12	CONTROL_Mild - HCM_Severe	-0.669686	5.25599e-06	9.87627e-05	Downregulated
MAGEA12	CONTROL_Normal - HCM_Severe	-0.629252	2.1966e-09	1.20191e-07	Downregulated
MAGEA12	HCM_Normal - HCM_Moderate	-0.20789	0.00753134	0.0309728	Downregulated
MAGEA12	CONTROL_Mild - HCM_Moderate	-0.616141	1.12258e-05	0.000188906	Downregulated
MAGEA12	CONTROL_Normal - HCM_Moderate	-0.575707	1.81708e-09	1.02653e-07	Downregulated
MAGEA12	CONTROL_Mild - HCM_Mild	-0.422897	0.00306336	0.0156671	Downregulated
MAGEA12	CONTROL_Normal - HCM_Mild	-0.382464	0.000145438	0.00153703	Downregulated
MAGEA12	CONTROL_Mild - HCM_Normal	-0.408251	0.00239998	0.0130243	Downregulated
MAGEA12	CONTROL_Normal - HCM_Normal	-0.367817	3.23791e-05	0.000452891	Downregulated
RHOB	CONTROL_Normal - HCM_Severe	1.21479	0.01026	0.0393224	Upregulated
RHOB	CONTROL_Mild - HCM_Moderate	1.07108	0.0132622	0.0480369	Upregulated
RHOB	CONTROL_Normal - HCM_Moderate	1.2491	0.00969443	0.037703	Upregulated
S100A9	HCM_Mild - HCM_Severe	-0.300456	0.00259329	0.0138161	Downregulated
S100A9	HCM_Normal - HCM_Severe	-0.306055	0.000526941	0.00425085	Downregulated
S100A9	CONTROL_Mild - HCM_Severe	-0.67246	4.48957e-06	8.64144e-05	Downregulated
S100A9	CONTROL_Normal - HCM_Severe	-0.808075	9.58521e-13	1.89526e-10	Downregulated
S100A9	HCM_Mild - HCM_Moderate	-0.243839	0.00752283	0.0309728	Downregulated
S100A9	HCM_Normal - HCM_Moderate	-0.249437	0.00148924	0.00914356	Downregulated
S100A9	CONTROL_Mild - HCM_Moderate	-0.615842	1.04712e-05	0.000179576	Downregulated
S100A9	CONTROL_Normal - HCM_Moderate	-0.751457	4.33469e-13	1.01924e-10	Downregulated
S100A9	CONTROL_Mild - HCM_Mild	-0.372003	0.00831325	0.033485	Downregulated
S100A9	CONTROL_Normal - HCM_Mild	-0.507619	1.25155e-06	2.82086e-05	Downregulated
S100A9	CONTROL_Mild - HCM_Normal	-0.366405	0.00582002	0.0255084	Downregulated
S100A9	CONTROL_Normal - HCM_Normal	-0.502021	7.39611e-08	2.60511e-06	Downregulated
AXIN2	CONTROL_Mild - HCM_Severe	-0.587192	0.00453117	0.0209685	Downregulated
AXIN2	CONTROL_Mild - HCM_Moderate	-0.669195	0.00107923	0.00725605	Downregulated
AXIN2	CONTROL_Normal - HCM_Moderate	-0.473623	0.0134654	0.0485895	Downregulated
AXIN2	CONTROL_Mild - HCM_Mild	-0.84144	0.000174259	0.00177316	Downregulated
AXIN2	CONTROL_Normal - HCM_Mild	-0.645867	0.00243807	0.0131747	Downregulated
AXIN2	CONTROL_Mild - HCM_Normal	-0.859029	8.68032e-05	0.00100692	Downregulated
AXIN2	CONTROL_Normal - HCM_Normal	-0.663456	0.00413736	0.0195346	Downregulated
CCL15	HCM_Mild - HCM_Severe	0.386249	0.00620569	0.0267777	Upregulated
CCL15	CONTROL_Mild - HCM_Moderate	-0.447727	0.00411969	0.0195002	Downregulated
CCL15	CONTROL_Mild - HCM_Mild	-0.655787	0.000218865	0.00212214	Downregulated
CCL15	CONTROL_Normal - HCM_Mild	-0.412121	0.0111334	0.0419671	Downregulated
CCL15	CONTROL_Mild - HCM_Normal	-0.595498	0.000454167	0.00377749	Downregulated
CD46	HCM_Mild - HCM_Severe	-0.18954	0.00717823	0.029895	Downregulated
CD46	CONTROL_Normal - HCM_Severe	-0.272108	5.8996e-05	0.000737449	Downregulated
CD46	CONTROL_Normal - HCM_Moderate	-0.227849	0.000183751	0.00185241	Downregulated
CD46	CONTROL_Normal - HCM_Normal	-0.196834	0.00120782	0.00786185	Downregulated
CDK6	CONTROL_Mild - HCM_Severe	-0.454051	0.00481247	0.0219695	Downregulated
CDK6	CONTROL_Normal - HCM_Severe	-0.315311	0.00328124	0.0163405	Downregulated
CDK6	CONTROL_Mild - HCM_Moderate	-0.401174	0.00914045	0.0360317	Downregulated
CDK6	CONTROL_Normal - HCM_Moderate	-0.262435	0.0067296	0.0285003	Downregulated
CDK6	CONTROL_Mild - HCM_Normal	-0.39836	0.0100192	0.0385694	Downregulated
CDK6	CONTROL_Normal - HCM_Normal	-0.25962	0.00815629	0.0329432	Downregulated
ENDOG	HCM_Mild - HCM_Severe	-0.450077	0.00181185	0.0105352	Downregulated
ENDOG	HCM_Normal - HCM_Severe	-0.358478	0.00414673	0.0195643	Downregulated
ENDOG	CONTROL_Mild - HCM_Severe	-0.56017	0.00478649	0.0218825	Downregulated
ENDOG	CONTROL_Normal - HCM_Severe	-0.47112	0.000460787	0.00381432	Downregulated
ENDOG	HCM_Mild - HCM_Moderate	-0.334146	0.0108434	0.0410165	Downregulated
ENDOG	CONTROL_Normal - HCM_Moderate	-0.355189	0.0031214	0.0157946	Downregulated
EP300	HCM_Mild - HCM_Severe	-0.27244	0.000197548	0.00196195	Downregulated
EP300	HCM_Normal - HCM_Severe	-0.250592	9.72641e-05	0.00109469	Downregulated
EP300	CONTROL_Mild - HCM_Severe	-0.418798	4.70605e-05	0.000616454	Downregulated
EP300	CONTROL_Normal - HCM_Severe	-0.344798	1.09047e-06	2.51647e-05	Downregulated
EP300	HCM_Mild - HCM_Moderate	-0.284499	3.40225e-05	0.000470369	Downregulated
EP300	HCM_Normal - HCM_Moderate	-0.262651	8.55042e-06	0.00015089	Downregulated
EP300	CONTROL_Mild - HCM_Moderate	-0.430856	1.59664e-05	0.00025256	Downregulated
EP300	CONTROL_Normal - HCM_Moderate	-0.356857	6.47216e-08	2.32677e-06	Downregulated
HLA-B	CONTROL_Mild - HCM_Severe	0.677875	0.00698038	0.0292671	Upregulated
HSP90B1	HCM_Mild - HCM_Severe	0.251275	0.012216	0.0450527	Upregulated
HSP90B1	CONTROL_Mild - HCM_Severe	0.770295	4.46648e-07	1.15995e-05	Upregulated
HSP90B1	CONTROL_Normal - HCM_Severe	0.762713	1.16229e-11	1.68788e-09	Upregulated
HSP90B1	CONTROL_Mild - HCM_Moderate	0.731649	5.67841e-07	1.43195e-05	Upregulated
HSP90B1	CONTROL_Normal - HCM_Moderate	0.724066	2.80618e-12	4.78701e-10	Upregulated
HSP90B1	CONTROL_Mild - HCM_Mild	0.51902	0.000426288	0.00360069	Upregulated
HSP90B1	CONTROL_Normal - HCM_Mild	0.511438	1.55166e-06	3.40713e-05	Upregulated
HSP90B1	CONTROL_Mild - HCM_Normal	0.595655	2.7058e-05	0.000394313	Upregulated
HSP90B1	CONTROL_Normal - HCM_Normal	0.588073	2.22394e-09	1.20927e-07	Upregulated
ID1	CONTROL_Mild - HCM_Severe	-0.771256	0.0104439	0.0398867	Downregulated
ID1	CONTROL_Normal - HCM_Severe	-0.84382	0.0103872	0.0396876	Downregulated
ID1	CONTROL_Mild - HCM_Moderate	-0.803753	0.00918279	0.0361168	Downregulated
ID1	CONTROL_Normal - HCM_Moderate	-0.876318	0.00997074	0.038417	Downregulated
ID1	CONTROL_Mild - HCM_Mild	-0.914651	0.00495891	0.0225052	Downregulated
ID1	CONTROL_Normal - HCM_Mild	-0.987216	0.0056065	0.0247302	Downregulated
ID1	CONTROL_Mild - HCM_Normal	-0.95809	0.00449807	0.0208488	Downregulated
ID1	CONTROL_Normal - HCM_Normal	-1.03065	0.00560116	0.0247235	Downregulated
[truncated: 438 more rows]
