# Supplementary material for: Spatial Transcriptomic Analysis of Focal and Normal Areas of Myocyte Disarray in Human Hypertrophic Cardiomyopathy
Source: Int J Mol Sci. 2023 Aug 10;24(16):12625. doi: 10.3390/ijms241612625 (PMC10454036; doi:10.3390/ijms241612625)
Supplement: Supplementary file 1 [file ijms-24-12625-s001.zip › supplemental_table_S3_overlapping_cell_marker_genes.xlsx]

## Sheet: Sheet 1
Macrophage	Cardiomyocyte	Fibroblast	Pericyte	Endothelial	Lymphatic Endothelial	Dendritic cell	T-Lymphocyte	Smooth Muscle	Neuron
F13A1	FGF12	C7	PDGFRB	ID1	HLA-E	CD74	B2M	ACTA2	CD9
MRC1	CACNA1C	RORA	PLA2G5	FLT1	APP	FOS	HLA-B	MCAM
CD163	CDH2	PDGFD	NOTCH3	PIK3R3	TGFBR2	TLR2	FYN	PDGFRB
TBXAS1	CACNB2	CFD	ACTA2	B2M	DOCK9	TBXAS1		NOTCH3
ZEB2	EFNA5	COL6A3	MFGE8	ENG	PECAM1	GRB2		FLNA
TLR2	NCAM1	C1S	PTEN	IFI27	CD9	HLA-DRA		PLA2G5
ATG7	PPARGC1A	COL1A2	PLCE1	RASGRF2	CD59	ZEB2		PLCE1
GRB2	PRKAA2	VCAN	FGF1	HLA-B	IL6ST	TET2
CD74	RRAD	SPRY1	ITGB1	PECAM1	ITGA9	ATG7
PPP3R1	ATP2A2	ZEB1	ACTB	A2M	EFNA5	JUNB
		FN1		ITGA1		VCAN
		LRP1		ITGA6		DUSP1
				HLA-A		MAP2K1
				HLA-C
				DOCK9
				HLA-E
				CD9
				HES1
				CD74
